# Supplementary material for: Parkinson’s disease, temporomandibular disorder pain and bruxism and its clinical consequences: a protocol of a single-centre observational outpatient study
Source: PubMed Central journal article supplement — BMJ Open. 2022 Apr 18;12(4):e052329. doi: 10.1136/bmjopen-2021-052329 (PMC9016408; doi:10.1136/bmjopen-2021-052329), 2022-04-18
Supplement: bmjopen-2021-052329.draft_revisions.pdf [file bmjopen-2021-052329.draft_revisions.pdf]

# BMJ Open

BMJ Open is committed to open peer review. As part of this commitment we make the peer review history of every article we publish publicly available.

When an article is published we post the peer reviewers' comments and the authors' responses online. We also post the versions of the paper that were used during peer review. These are the versions that the peer review comments apply to.

The versions of the paper that follow are the versions that were submitted during the peer review process. They are not the versions of record or the final published versions. They should not be cited or distributed as the published version of this manuscript.

BMJ Open is an open access journal and the full, final, typeset and author-corrected version of record of the manuscript is available on our site with no access controls, subscription charges or pay-per-view fees (<http://bmjopen.bmj.com>).

If you have any questions on BMJ Open's open peer review process please email [info.bmjopen@bmj.com](mailto:info.bmjopen@bmj.com)

# BMJ Open

## Parkinson's disease, temporomandibular disorder pain, and bruxism and its clinical consequences. A protocol of a clinical study

|                               |                                                                                                                                                                                                                                                                                                     |
|-------------------------------|-----------------------------------------------------------------------------------------------------------------------------------------------------------------------------------------------------------------------------------------------------------------------------------------------------|
| Journal:                      | <i>BMJ Open</i>                                                                                                                                                                                                                                                                                     |
| Manuscript ID                 | bmjopen-2021-052329                                                                                                                                                                                                                                                                                 |
| Article Type:                 | Protocol                                                                                                                                                                                                                                                                                            |
| Date Submitted by the Author: | 23-Apr-2021                                                                                                                                                                                                                                                                                         |
| Complete List of Authors:     | Verhoeff, Merel; ACTA, Orofacial Pain and Dysfunction<br>Koutris, Michail; ACTA, Orofacial Pain and Dysfunction<br>Berendse, Henk; Amsterdam University Medical Centres<br>Dijk van, Karin; Epilepsy Netherlands Foundation Sleep-Wake Centre<br>Lobbezoo, F.; ACTA, Orofacial Pain and Dysfunction |
| Keywords:                     | Parkinson-s disease < NEUROLOGY, EPIDEMIOLOGY, Motor neurone disease < NEUROLOGY, ORAL MEDICINE                                                                                                                                                                                                     |
|                               |                                                                                                                                                                                                                                                                                                     |

SCHOLARONE™  
Manuscripts

# Parkinson's disease, temporomandibular disorder pain, and bruxism and its clinical consequences. A protocol of a clinical study

---

M.C. Verhoeff, DDS, MSc<sup>1</sup> – M.C.Verhoeff@acta.nl

M. Koutris, DDS, PhD<sup>1</sup> – M.Koutris@acta.nl

H.W. Berendse, MD, PhD<sup>2</sup> – H.Berendse@amsterdamumc.nl

K.D. van Dijk, MD, PhD<sup>2,3</sup> – [Kvdijk@sein.nl](mailto:Kvdijk@sein.nl)

F. Lobbezoo, DDS, PhD<sup>1</sup> – F.Lobbezoo@acta.nl

<sup>1</sup>Department Orofacial Pain and Dysfunction, Academic Centre for Dentistry Amsterdam (ACTA), University of Amsterdam and Vrije Universiteit Amsterdam, Gustav Mahlerlaan 3004, 1081 LA Amsterdam, The Netherlands

<sup>2</sup>Amsterdam University Medical Centres, Vrije Universiteit Amsterdam, Neurology, Amsterdam Neuroscience, De Boelelaan 1117, 1081 HV Amsterdam, The Netherlands

<sup>3</sup>Sleep Wake Centre, Stichting Epilepsie Instellingen Nederland (SEIN), Achterweg 2, 2103 SW Heemstede, The Netherlands

## Corresponding author:

M.C. Verhoeff

Gustav Mahlerlaan 3004

1081 LA Amsterdam

M.C.Verhoeff@acta.nl

## Abstract

**Introduction:** A recent questionnaire-based study suggested that bruxism and painful temporomandibular disorders (TMD pain) may be more prevalent in Parkinson's disease (PD) patients compared to controls. The presence of both bruxism and TMD pain could negatively influence patients' satisfaction and quality of life. The present study is designed to clinically and more objectively investigate the prevalence of bruxism and TMD pain in PD patients. The secondary aim of the study is to identify factors associated with the presence of bruxism and TMD pain in PD patients, such as disease severity and dopaminergic medication usage.

Furthermore, the presence of tooth wear in PD patients will be studied as this can be a major consequence of bruxism. Finally, deviations in saliva composition that may contribute to tooth wear will be studied.

**Methods and analysis:** This is a single-centre observational clinical study at the Amsterdam University Medical Centres, location VUmc. All patients with a clinical diagnosis of PD will be eligible for inclusion. Participants will fill in a set of questionnaires. Subsequently, patients will be examined clinically for, amongst others, TMD pain, presence and severity of tooth wear, and deviations in saliva composition. Sleep-time registrations will take place for 5 nights with the GrindCare<sup>®</sup> GC4 (i.e., a portable, single-channel electromyographic recorder) to assess sleep bruxism and simultaneously by the use of the BruxApp for 5 days to assess awake bruxism. We will partly use data collected during standard clinical care, to minimize the patient burden.

**Ethics and dissemination:** The scientific and ethical aspects of this study protocol have been approved by the Medical Ethics Review Committee of the Amsterdam UMC, location VUmc; NL. 2019.143). Informed consent will be obtained from all participants.

**Trial registration:** NL8307

**Keywords:** Parkinson's Disease; Bruxism; Temporomandibular Disorders; Protocol; Tooth wear; Saliva

## Strengths and limitations of this study:

- This clinical study will provide accurate data on the prevalence of bruxism and painful temporomandibular disorders in Parkinson patients attending the outpatient clinic for movement disorders of Amsterdam UMC, location VUmc, and their possible associated factors like medication usage and disease severity.
- Novel information about tooth wear and saliva composition and quantity in patients with Parkinson's disease will be collected.

- Since polysomnographic recordings for the assessment of definite sleep bruxism are not feasible in this study, a portable, single-channel electromyographic recorder is used instead.
- Electromyographic recordings will be performed for several nights in a row, thus taking into account the fluctuating nature of sleep bruxism.
- Because of the design of this study, no causal relationships can be established between the outcome variables and predictors.

## Introduction

Parkinson's disease (PD) is a neurodegenerative movement disorder characterized by motor symptoms, in particular rigidity, bradykinesia, and tremor<sup>1,2</sup>. Patients with PD do not solely experience motor symptoms, but also non-motor symptoms like pain, anxiety, depression, sleep problems, and cognitive dysfunction<sup>3,4</sup>. Due to global ageing, the prevalence of PD is estimated to increase significantly in the near future. Ageing is associated with oral health-related issues, which therefore may occur more frequently<sup>5</sup>. Dentists regularly see patients with movement disorders in the orofacial area. The most common oral movement disorder in the dental office is bruxism, which is not necessarily associated with systemic diseases. Bruxism is currently defined as "a repetitive jaw-muscle activity characterized by clenching or grinding of the teeth and/or by bracing or thrusting of the mandible"<sup>6</sup>. It can occur during sleep, indicated as sleep bruxism, or during wakefulness, indicated as awake bruxism<sup>6</sup>. Not only bruxism itself, but also its possible consequences, such as mechanical tooth wear and temporomandibular disorders (TMD), have hardly been studied in patients with PD. TMD is a collective term embracing disorders of the temporomandibular joint, masticatory muscles, and adjacent anatomical structures<sup>7</sup>. TMD can present as painful and non-painful conditions. Patients with TMD can report, for example, pain (including headache), limitations in the movement of the mandible, and joint noises<sup>7</sup>. Both tooth wear and TMD may affect the oral health-related quality of life<sup>8</sup>.

In a population with PD patients, oral health was recently studied<sup>9</sup>. It was shown that the oral health in PD patients is deteriorated as compared to their peers without PD. Besides, medication use can influence salivation production, and in turn the oral environment<sup>10</sup>. Also, gastrointestinal problems are more frequently shown in patients with PD. In turn, this could influence the presence of tooth wear due to reflux<sup>11,12</sup>.

While oral health care in PD has not been studied widely<sup>9</sup>, oral (dys-)function in PD has been studied even less, even though PD, bruxism, and TMD have been suggested to share several common characteristics (see Figure 1). Similar to PD, bruxism is a condition that is considered to be regulated centrally and not peripherally<sup>13</sup>.

Also, in the pathophysiology of both PD and bruxism, the brain dopamine system plays an important role<sup>14-16</sup>. Besides, sleep disturbances<sup>17</sup> that are present both in PD<sup>18</sup> and in sleep bruxism, are associated with arousal activity<sup>17,18</sup>. As a result of such arousal activity, sleep bruxism may occur more frequently in people with sleep disturbances than in those without<sup>19</sup>. Also, in the prodromal phase of PD, a higher rhythmic masticatory muscle activity (RMMA) on polysomnography in NREM sleep has been observed, compared to controls<sup>20</sup>. This is a characteristic that is also seen in sleep bruxism patients<sup>21</sup>. Furthermore, bruxism is considered as a risk factor for TMD<sup>22</sup>. TMD itself shares some characteristics with PD. For example, musculoskeletal pain (of which

1  
2  
3 TMD pain is a subtype) is frequently reported by patients with PD<sup>3,23</sup>. Finally, suggestions have been put  
4 forward that alterations in the dopaminergic system are also present in patients with pain in the orofacial  
5 region<sup>24</sup>, although this remains to be confirmed in patients with TMD pain.  
6  
7

8  
9 Recently, a questionnaire-based pilot study in 368 patients with PD and 340 controls suggested a higher  
10 prevalence of bruxism and TMD pain in patients with PD<sup>25</sup>. Also, PD patients reported a higher mean TMD-pain  
11 intensity than controls<sup>25</sup>. However, since this was a questionnaire-based study, extrapolation of these findings  
12 requires further verification through clinical data. To overcome some of the limitations of the previous pilot  
13 study, the present protocol was designed. The planned study will acquire more objective clinical/instrumental  
14 measures for awake and sleep bruxism and TMD pain, which can give more valid information on outcomes like  
15 the prevalence of bruxism in this population. Also, additional factors, such as the severity of PD and cognitive  
16 function, will be included as possible predictors for the presence of bruxism and/or TMD pain in PD patients.  
17 Knowledge of the factors that can influence bruxism and/or TMD pain in patients with PD will help dentists  
18 and other oral health care providers to provide individualised care to prevent and/or alleviate symptoms of  
19 bruxism and/or TMD pain and their consequences in this vulnerable group of patients.  
20  
21  
22  
23  
24  
25  
26

27 Based on the above-summarized evidence, the primary aim of this study is to investigate the prevalence of  
28 bruxism and TMD pain in PD patients, through objective measurements. Based on our pilot-study outcomes<sup>25</sup>,  
29 we hypothesise that the prevalence of bruxism and TMD pain in the current population will be higher than in  
30 their peers without PD, described in the literature<sup>26,27</sup>.  
31  
32  
33  
34

35 In addition, the secondary aims and their corresponding hypotheses are the following:

- 36 1. To identify which factors are associated with the presence of bruxism and TMD pain in PD patients. We  
37 hypothesise that factors like medication usage<sup>14</sup>, disease severity<sup>13,15</sup>, psychosocial factors<sup>28-30</sup>, and  
38 lifestyle factors<sup>28,29,31</sup> are influencing the studied associations.  
39
- 40 2. To investigate whether the salivary flow, the pH, and the buffer capacity of saliva in patients with PD are  
41 related to the severity of tooth wear. Our hypothesis is that in patients with PD, the saliva composition  
42 and salivary flow deviate from normal standards and that this is associated with the severity of tooth  
43 wear<sup>12</sup>.  
44
- 45 3. To investigate with Dopamine Transporter Single Photon Emission Computed Tomography (DAT-SPECT)  
46 whether there is a relationship between the degree of presynaptic dopaminergic loss and the presence of  
47 bruxism in these patients. The hypothesis is that there is a difference in striatal dopaminergic deficit  
48 between PD patients with and without bruxism, in which patients without bruxism show a smaller deficit.  
49  
50  
51  
52  
53  
54  
55  
56  
57  
58  
59  
60

## Methods and analysis

The design of this study is a single-centre observational clinical study that will take place at the Department of Neurology of the Amsterdam University Medical Centres (Amsterdam UMC), location VUmc. The data collection will take place for two years.

### Participants and eligibility

Patients already clinically diagnosed with PD or planned for an intake appointment with presumable PD at the outpatient clinic for movement disorders of the VUmc, will be eligible to participate in the study. Yearly, about 100-120 new consultations for PD are seen in the outpatient clinic. In addition, patients already receiving treatment at the VUmc are eligible for participation as well. The inclusion and exclusion criteria are listed in Table 1.

### Study procedure

In Figure 2, the study procedure is visualized. If patients agree to participate in the study, they will be asked to sign an informed consent. This study will be performed in parallel to the routine clinical care (see Table 2) at the Amsterdam UMC, location VUmc. When questionnaires/screenings were filled in  $\geq 1$  year ago, participants will be asked to repeat this. Specifically, for this study, additional information will be obtained in the form of a set of questionnaires that participants can fill in at home and a clinical examination at the hospital (see Table 3). The neurologist will determine whether additional brain imaging (viz., MRI or DAT-SPECT) is necessary, mainly in cases of clinical doubt. The estimated percentage of additional brain imaging in newly referred patients is 40%.

### Main study parameters

The main study parameters or endpoints are “presence of bruxism (sleep and/or awake)” as well as “diagnosis of TMD pain”. For the assessment of sleep bruxism, patients will be asked to sleep 5 complete registration nights with a portable, single-channel electromyographic recorder, viz., the GrindCare® GC4 (Sunstar Suisse SA, Etoy, Switzerland)<sup>32</sup>. For the assessment of awake bruxism, patients will use, for 5 complete registration days, the BruxApp<sup>33</sup>, which is a mobile application for the recording of bruxism activity based on ecological momentary assessment<sup>6</sup>. According to international consensus, a classification of the probability that bruxism is present can be made as follows: possible, probable, and definite bruxism presence<sup>6</sup>. In this research, all probabilities of bruxism presence can be determined, however, the highest probability will be used (viz., both probable and definite). When patients cannot use the GrindCare® GC4 and/or BruxApp, and more certainty towards a definite presence is thus impossible, probable bruxism presence will be determined with the use of data from the clinical examination, based on the presence of positive symptoms of bruxism (viz., clenching marks in the soft tissues of the cheek, tongue, or lip, mechanical tooth wear (attrition), and/or hypertrophy of the masseter muscle)<sup>6</sup>.

1  
2  
3 The TMD-pain diagnosis will be established according to the Diagnostic Criteria for TMD (DC/TMD)<sup>34</sup>, with the  
4 use of standardized questionnaires and clinical examination procedures. Based on the collected data, the  
5 following diagnoses can be set: myalgia (local myalgia, myofascial pain, myofascial pain with referral),  
6 arthralgia, headache attributed to TMD, and non-painful joint disorders (disc displacement with reduction, disc  
7 displacement with reduction with intermitted locking, disc displacement without reduction with limited mouth  
8 opening, disc displacement without reduction without limited mouth opening, degenerative joint disease,  
9 subluxation). The main focus of this research protocol will be the TMD-pain diagnosis, for the establishment of  
10 which the diagnostic flow chart of the DC/TMD will be used<sup>34</sup>.  
11  
12  
13  
14  
15

### 16 **Secondary study parameters**

17 To identify which factors are associated with the presence of bruxism and TMD pain in PD patients, several  
18 variables will be evaluated (see Tables 2 and 3), using different clinical/instrumental measures (see appendix  
19 1). Most of these variables have already been reported as risk factors for bruxism<sup>29</sup> and/or TMD<sup>35</sup> in the  
20 general population<sup>28-30</sup>. However, the variables dopaminergic medication usage and disease stage/severity of  
21 PD have not been studied yet in the association with bruxism or TMD pain. Finally, if DAT-SPECT imaging is  
22 available, we will compare the measured presynaptic striatal dopaminergic deficit between participants with  
23 and without bruxism<sup>36</sup>.  
24  
25  
26  
27  
28  
29

### 30 **Sample size**

31 According the pilot study, the prevalence of awake bruxism, sleep bruxism, and TMD pain in patients with PD is  
32 46%, 24%, and 29.5%, respectively<sup>21</sup>. Taking the cautious approach, we calculated the sample size for all  
33 conditions and chose the largest sample size. Aiming for a precision of 5% with a level of confidence of 95%,  
34 382 participants are needed<sup>37</sup>. See appendix 2 for the sample size calculation. Furthermore, the approach to  
35 calculate the sample size for the most important secondary aim (viz., to identify which factors are associated  
36 with the presence of bruxism and TMD pain in PD patients) is also shown in appendix 2. The numbers are  
37 obtained when reaching the sample size for the primary aim.  
38  
39  
40  
41  
42  
43

### 44 **Statistical approach**

45 With the use of descriptive tests, demographic data will be summarised. In Figure 3, it is shown how the  
46 dataset is analysed to give an answer on which factor is associated with the presence/absence of probable  
47 bruxism/TMD pain or with the frequency of definite bruxism. The forward selection procedure will be used for  
48 the (strongest) independent variables (see Table 4) until all variables in this regression model show a P-value  
49 <0.05 (See Step 2, Figure 3). Finally, to analyse if there is an association between tooth wear and composition  
50 of saliva, Spearman's correlation coefficient will be used. For the DAT-SPECT, a semi-quantitative analysis will  
51 be used. Ratios for specific versus non-specific binding will be calculated for the regions of interest and  
52 analysed using the independent sample t-test<sup>36,38</sup>.  
53  
54  
55  
56  
57  
58

### 59 **Patient and public involvement**

1  
2  
3 Neither patients nor the community were involved in the design or performance of this study. However,  
4 feedback from participants of the earlier pilot study<sup>21</sup> was used to design this study. The burden for the  
5 participants will be kept as minimal as possible. On request, the outcomes of this study will be disseminated to  
6 the participants.  
7  
8  
9

## 10 Discussion

11 The primary aim of this study is to objectively measure the prevalence of bruxism and TMD pain in a  
12 population of patients with Parkinson's Disease (PD). Furthermore, the three secondary aims are described as  
13 follows: (i) to identify which factors are associated with the presence of bruxism and TMD pain in PD patients,  
14 (ii) to investigate whether the salivary flow, the pH, and the buffer capacity of saliva in patients with PD are  
15 related to the severity of tooth wear, and finally (iii) to investigate with DAT-SPECT whether there is a  
16 relationship between the degree of presynaptic dopaminergic loss and the presence of bruxism in these  
17 patients.  
18  
19  
20  
21  
22  
23

24 To the best of our knowledge, this is the first study that attempts to objectively measure the prevalence of  
25 awake bruxism, sleep bruxism, and TMD pain in a population of patients with PD. Previous studies investigated  
26 the prevalence of awake bruxism in this population, however only few participants were included or only  
27 questionnaires were used<sup>21,39</sup>. Furthermore, in the present study, the use of the GrindCare® GC4 and the  
28 BruxApp can give more certainty towards a definite establishment of sleep and awake bruxism, respectively<sup>6</sup>.  
29 In addition, the clinical examination according to the DC/TMD<sup>34</sup> enables setting a valid TMD-pain diagnosis,  
30 making a distinction between several TMD complaints, and comparing the outcomes with other (inter-  
31 national research.  
32  
33  
34  
35  
36  
37

38 Because PD patients are vulnerable and burdened with frequent visits to multiple caregivers (e.g., their  
39 neurologist, physiotherapist, and speech therapist), it is important to burden the participants as minimally as  
40 possible. Therefore, during the process of designing this study and collecting the data, a multidisciplinary  
41 approach was established between neurologists and dentists to enable an as efficient as possible usage of the  
42 patient's time and energy.  
43  
44  
45  
46

47 The targeted number of inclusions will be a challenge. However, the calculated sample size is an estimation,  
48 because no clinical prevalences are known as yet. Like in otherwise healthy individuals, clenching and grinding  
49 are not always recognized by the patients themselves<sup>40,41</sup>, thus the prevalence of sleep bruxism in the pilot  
50 study could have been underestimated. This means that the calculated sample size in this study might be  
51 higher than eventually required. Therefore, an interim analysis will be performed after 130 included  
52 participants or 6 months.  
53  
54  
55  
56

57 This study has no longitudinal character and therefore, no causal relations can be observed between the (in-  
58 dependent variables. Also, polysomnography is the golden standard to detect sleep bruxism while in the  
59  
60



1  
2  
3 present study, a portable electromyographic recorder will be used<sup>6</sup>. However, since this device will be used for  
4 several nights in a row, the fluctuating character of sleep bruxism can be taken into account and is therefore  
5 considered a good proxy for definite sleep bruxism<sup>32</sup>. It should be noted, however, that the portable recorder  
6 will fail to enable a distinction between jaw-muscle activities related to sleep bruxism and those related to  
7 other orofacial movement disorders like oral dyskinesia and oro-mandibular dystonia<sup>43</sup>. This is an important  
8 issue, because such movement disorders can be present in patients with PD related to their medication usage.  
9 Fortunately, in the questionnaire and clinical examination of the MDS-UPDRS<sup>44</sup> (Table 2), the presence of oral  
10 dyskinesia and oro-mandibular dystonia is included. Hence, it is possible to correct for their presence in the  
11 data analysis.  
12  
13  
14  
15  
16  
17

18 In conclusion, this study will give more detailed information about the prevalence of bruxism and TMD pain in  
19 patients with PD, as well as about possible associated factors like medication usage and severity of the disease.  
20 Finally, more clinically relevant information will become available for dentists and other oral health care  
21 professionals about the amount of tooth wear and the composition of saliva in patients with PD.  
22  
23  
24

### 25 **Ethics and dissemination:**

26 This study protocol has been approved by the Medical Ethics Review Committee of Amsterdam UMC, location  
27 VUmc; NL. 2019.143). Informed consent will be obtained from all participants. A data monitor will meet  
28 annually to primarily concentrate on the safety of patients, and will be monitoring the collected data and  
29 informed consents.  
30  
31  
32  
33

34 Due to the sensitive nature of personal information, all data will be blinded and stored in secure  
35 environments. Only the executive researcher and the head of the department can reach the unblinded  
36 informed consents and the key for unblinding. These are stored separately. Digital data will be stored  
37 pseudonymized in a secure database using Castor EDC (CDISC, Amsterdam, Netherlands). Detailed methods for  
38 data management and storage can be obtained by contacting the corresponding author.  
39  
40  
41  
42

### 43 **Authors contribution**

44 All authors were involved in designing this study. MV obtained the approval of the Medical Ethics Review  
45 Committee and drafted the manuscript. Finally, all authors gave feedback on the draft and approved the final  
46 manuscript.  
47  
48  
49

### 50 **Funding statement:**

51 This work was partly supported by the foundation for Oral Health and Parkinson's Disease (Stichting Mondzorg  
52 & Parkinson), the Dutch association for scientific dentistry (Nederlandse Wetenschappelijke Vereniging voor  
53 Tandheelkunde (NWVT)), and the Dutch association for Orofacial Pain, Dysfunction and Prosthetic Dentistry  
54 (Nederlandse Vereniging voor Gnathologie en Prothetische Tandheelkunde (NVGPT)).  
55  
56  
57  
58  
59  
60

## Competing interest

Dr. Lobbezoo reports grants and other from Sunstar Suisse SA, grants from Somnomed-Goedegebuure, grants from Airway Management, grants from Vivisol, grants from Health Holland, outside the submitted work.

For peer review only

## Tables

*Table 1. Inclusion and Exclusion criteria. When patients have a pacemaker, they cannot use the GrindCare® GC4 (i.e., a portable, single-channel electromyographic recorder to detect sleep bruxism) and will be excluded from that specific part of the study. When patients do not have a smartphone, participants cannot use the BruxApp (i.e., an application on a smartphone to assess awake bruxism) and will be excluded from that specific part of the study.*

| Inclusion criteria                                                | Exclusion criteria                      |
|-------------------------------------------------------------------|-----------------------------------------|
| 1. ≥18 years of age                                               | 1. atypical parkinsonian syndromes      |
| 2. > 21 on the Montreal Cognitive Assessment (MoCA) <sup>45</sup> | 2. for using the GrindCare: pacemaker   |
| 3. fulfil clinical diagnostic criteria for PD <sup>46</sup>       | 3. for using the BruxApp: no smartphone |

*Table 2. Questionnaires and clinical data collected as part of the regular care at the hospital, which is used in this observational study. See Appendix 1 for a description per questionnaire/instrument.*

| Variables standard care hospital                                                                                                                                                                                                                                                                                                                                                                                                                      |
|-------------------------------------------------------------------------------------------------------------------------------------------------------------------------------------------------------------------------------------------------------------------------------------------------------------------------------------------------------------------------------------------------------------------------------------------------------|
| 1. Cognitive function (Montreal Cognitive Assessment, MoCA) <sup>45</sup> ; (Parkinson's Disease Cognitive Functional Rating Scale, PD-CFRS) <sup>42</sup>                                                                                                                                                                                                                                                                                            |
| 2. Disease stage (Hoehn & Yahr) <sup>47</sup> ; Disease severity (Unified Parkinson's Disease Rating Scale – III, UPDRS-III) <sup>44</sup>                                                                                                                                                                                                                                                                                                            |
| 3. Dopaminergic medication (Levodopa equivalent daily dose, LEDD) <sup>48</sup>                                                                                                                                                                                                                                                                                                                                                                       |
| 4. Neuropsychiatric symptoms: Depression (Beck Depression Inventory-ii, BDI-ii) <sup>49</sup> ; Apathy (Apathy evaluation scale, AES) <sup>50</sup> ; Anxiety (Parkinson Anxiety Scale, PAS) <sup>51</sup> ; Psychotic (Parkinson's Disease-adapted scale for assessment of positive symptoms, SAPS-PD) <sup>52</sup> ; Impulse control (Questionnaire for Impulsive-Compulsive Disorders in Parkinson's Disease-Rating Scale, QUIP-RS) <sup>53</sup> |
| 5. Presynaptic dopaminergic loss, when applicable (brain imaging) (Dopamine Transporter Single Photon Emission Computed Tomography, DAT-SPECT) <sup>36,38</sup>                                                                                                                                                                                                                                                                                       |
| 6. Quality of sleep (Scales for Outcomes PD Sleep, SCOPA-SLEEP) <sup>54</sup>                                                                                                                                                                                                                                                                                                                                                                         |
| 7. Stimulants usage: Alcohol (per unit, daily), Drugs (per unit, daily), Smoking (per unit, daily)                                                                                                                                                                                                                                                                                                                                                    |

*Table 3. Additional research components, i.e., performed in addition to the regular appointments at the hospital. See Appendix 1 for a description per questionnaire/instrument.*

| Additional research components |                                                                                                                                                                                                           |
|--------------------------------|-----------------------------------------------------------------------------------------------------------------------------------------------------------------------------------------------------------|
| Questionnaires                 | 1. Reflux (GerdQ-NL) <sup>55</sup>                                                                                                                                                                        |
|                                | 2. TMD pain (according to the Diagnostic Criteria for TMD, DC/TMD) <sup>34</sup> and intensity (graded chronic pain scale, GCPS) <sup>56</sup>                                                            |
|                                | 3. Tooth wear                                                                                                                                                                                             |
|                                | 4. Sleep (Obstructive Sleep Apnea, STOP-Bang NL) <sup>57</sup>                                                                                                                                            |
| Clinical examination           | 1. Intra-oral examination (positive symptoms of bruxism (viz., clenching marks in the soft tissues of the cheek, tongue or lip, mechanical tooth wear, hypertrophy of the masseter muscle)) <sup>34</sup> |
|                                | 2. Quantitative tooth wear screening (part of the Tooth Wear Evaluation System, TWES) <sup>58</sup>                                                                                                       |
|                                | 3. A brief screening of the dental prosthesis (when applicable)                                                                                                                                           |
|                                | 4. Dry mouth screening (Clinical Oral Dryness Score, CODS) <sup>59</sup>                                                                                                                                  |
|                                | 5. Jaw-mobility examination (DC/TMD) <sup>34</sup>                                                                                                                                                        |
|                                | 6. Joint noises examination (DC/TMD) <sup>34</sup>                                                                                                                                                        |

|                     |                                                                                         |
|---------------------|-----------------------------------------------------------------------------------------|
|                     | 7. Palpation of masticatory muscles and temporomandibular joints (DC/TMD) <sup>34</sup> |
|                     | 8. Dynamic/static tests <sup>60</sup>                                                   |
|                     | 9. Bruxoprovoctiontest <sup>61</sup>                                                    |
|                     | 10. Saliva test (Saliva-Check Buffer <sup>®</sup> ) <sup>62</sup>                       |
| <b>Registration</b> | 1. BruxApp <sup>61</sup>                                                                |
|                     | 2. GrindCare <sup>®</sup> GC4 <sup>32,63</sup>                                          |

Table 4. The independent variables (categorized) that will be investigated for one of the secondary aims: which factors are associated with the presence of bruxism and TMD pain in patients with Parkinson's Disease?

| <b>Independent variables (categorized)</b> |                                                                                                         |
|--------------------------------------------|---------------------------------------------------------------------------------------------------------|
| 1.                                         | Bruxism (when analysing which factors are associated with the presence of TMD pain in patients with PD) |
| 2.                                         | Neuropsychiatric symptoms (depression, anxiety, apathy, psychosis, impulse disorders)                   |
| 3.                                         | Parkinson's Disease (disease stage, disease severity, medication usage, cognitive function)             |
| 4.                                         | Sleep (quality of sleep, obstructive sleep apnea)                                                       |
| 5.                                         | Stimulants usage (alcohol, smoking, drugs)                                                              |
| 6.                                         | TMD pain (when analysing which factors are associated with the presence of bruxism in patients with PD) |
| 7.                                         | Tooth Wear related (reflux, saliva, dry mouth)                                                          |

## References

1. Kalia L V, Lang AE, Shulman G. Parkinson's disease. *Lancet* 2015; 386(9996): 896-912
2. Opara JA, Matecki A, Małecka E, Socha T. Motor assessment in parkinson's disease. *Ann Agric Environ Med* 2017; 24(3): 411-415
3. Khoo TK, Yarnall AJ, Duncan GW, et al. The spectrum of nonmotor symptoms in early Parkinson disease. *Neurology* 2013; 80(3): 276-281
4. Chaudhuri KR, Healy DG, Schapira AH V. Non-motor symptoms of Parkinson's disease: diagnosis and management. *Lancet Neurol* 2006; 5(3): 235-45.
5. Ettinger RL. Oral health and the aging population. *J Am Dent Assoc* 2007; 138(suppl): 5S-6S
6. Lobbezoo F, Ahlberg J, Raphael KG, et al. International consensus on the assessment of bruxism: Report of a work in progress. *J Oral Rehabil* 2018; 45(11): 837-844
7. Leeuw R de, Klasser GD. *Orofacial Pain: Guidelines for Assessment, Diagnosis, and Management. 5th edition.* Chicago: Quintessence Publishing Co; 2013
8. Papagianni CE, van der Meulen MJ, Naeije M, Lobbezoo F. Oral health-related quality of life in patients with tooth wear. *J Oral Rehabil* 2013; 40(3): 185-90
9. Stiphout MAE van, Marinus J, Hilten JJ Van, Lobbezoo F, Baat C De. Oral Health of Parkinson's Disease Patients: A Case-Control Study. *Parkinson Dis* 2018; e9315285
10. Villa A, Wolff A, Narayana N, et al. World Workshop on Oral Medicine VI: a systematic review of medication-induced salivary gland dysfunction. *Oral Dis* 2016; 22(5): 365-82
11. Maeda T, Nagata K, Satoh Y, Yamazaki T, Takano D. High prevalence of gastroesophageal reflux disease in Parkinson's disease: A questionnaire-based study. *Parkinsons Dis* 2013; e742128
12. Wetselaar P, Manfredini D, Ahlberg J, et al. Associations between tooth wear and dental sleep disorders: A narrative overview. *J Oral Rehabil* 2019;
13. Lobbezoo F, Naeije M. Bruxism is mainly regulated centrally, not peripherally. *J Oral Rehabil* 2001; 28(12): 1085-1091
14. Lobbezoo F, Lavigne GJ, Tanguay R, Montplaisir JY. The effect of the catecholamine precursor L-dopa on sleep bruxism: A controlled clinical trial. *Mov Disord* 1997; 12(1): 73-78
15. Lobbezoo F, Soucy J, Montplaisir JY, Lavigne GJ. Striatal D2 Receptor Binding in Sleep Bruxism : A Controlled Study with Iodine-123-Iodobenzamide and Single-photon-emission Computed Tomography. *J Dent Res* 1996; 75(10): 1804-10
16. Lobbezoo F, Soucy JP, Hartman NG, Montplaisir JY, Lavigne GJ. Effects of the D2 receptor agonist bromocriptine on sleep bruxism: report of two single-patient clinical trials. *J Dent Res* 1997; 76(9): 1610-1614
17. Albers JA, Chand P, Anch AM. Multifactorial sleep disturbance in Parkinson's disease. *Sleep Med* 2017; 35: 41-48
18. Menza M, Dobkin RD, Marin H, Bienfait K. Sleep disturbances in Parkinson's disease. *Mov Disord* 2010; 25(suppl 1): S117-22
19. Kato T, Montplaisir JY, Guitard F, Sessle BJ, Lund JP, Lavigne GJ. Evidence that experimentally induced sleep bruxism is a consequence of transient arousal. *J Dent Res* 2003; 82(4): 284-8
20. Abe S, Gagnon JF, Montplaisir JY, et al. Sleep bruxism and oromandibular myoclonus in rapid eye movement sleep behavior disorder: A preliminary report. *Sleep Med* 2013; 14(10): 1024-1030
21. Lavigne GJ, Rompré PH, Poirier G, Huard H, Kato T, Montplaisir JY. Rhythmic masticatory muscle activity during sleep in humans. *J Dent Res* 2001; 80(2): 443-8
22. Manfredini D, Lobbezoo F. Relationship between bruxism and temporomandibular disorders: a systematic review of literature from 1998 to 2008. *Oral Surg Oral Med Oral Pathol Oral Radiol Endod.* 2010;109(6):e26-e50

- 1  
2  
3 23. Tai Y-C, Lin C-H. An overview of pain in Parkinson's disease. *Clin Park Relat Disord* 2020; 2: 1-8  
4  
5 24. Hagelberg N, Forssell H, Aalto S, et al. Altered dopamine D2 receptor binding in atypical facial pain. *Pain* 2003;  
6 106(1-2): 43-48  
7  
8 25. Verhoeff MC, Lobbezoo F, Wetselaar P, Aarab G, Koutris M. Parkinson's disease, temporomandibular disorders  
9 and bruxism: A pilot study. *J Oral Rehabil* 2018; 45(11): 854-863  
10  
11 26. Wetselaar P, Vermaire EJH, Lobbezoo F, Schuller AA. The prevalence of awake bruxism and sleep bruxism in the  
12 Dutch adult population. *J Oral Rehabil* 2019; 46(7): 617-623  
13  
14 27. Visscher CM, Ligthart L, Schuller AA, et al. Comorbid Disorders and Sociodemographic Variables in  
15 Temporomandibular Pain in the General Dutch Population. *J Oral Facial Pain Headache* 2015; 29(1): 51-9  
16  
17 28. Van Selms MKA, Visscher CM, Naeije M, Lobbezoo F. Bruxism and associated factors among Dutch adolescents.  
18 *Community Dent Oral Epidemiol* 2013; 41(4): 353-363  
19  
20 29. Manfredini D, Lobbezoo F. Role of psychosocial factors in the etiology of bruxism. *J Orofac Pain* 2009; 23(2): 153-  
21 66  
22  
23 30. Winocur E, Uziel N, Lisha T, Goldsmith C, Eli I. Self-reported Bruxism associations with perceived stress, motivation  
24 for control, dental anxiety and gagging. *J Oral Rehabil* 2011; 38(1): 3-11  
25  
26 31. Castroflorio T, Bargellini A, Rossini G, Cugliari G, Deregibus A. Sleep bruxism and related risk factors in adults: A  
27 systematic literature review. *Arch Oral Biol* 2017; 83:25-32  
28  
29 32. Yachida W, Arima T, Castrillon EE, Baad-Hansen L, Ohata N, Svensson P. Diagnostic validity of self-reported  
30 measures of sleep bruxism using an ambulatory single-channel EMG device. *J Prosthodont Res* 2016; 60(4): 250-  
31 257  
32  
33 33. Manfredini D, Winocur E, Guarda-Nardini L, Paesani D, Lobbezoo F. Epidemiology of Bruxism in Adults: A  
34 Systematic Review of the Literature. *J Orofac Pain* 2013; 27(2): 99-110  
35  
36 34. Schiffman E, Ohrbach R, Truelove E, et al. Diagnostic Criteria for Temporomandibular Disorders (DC/TMD) for  
37 Clinical and Research Applications: Recommendations of the International RDC/TMD Consortium Network\* and  
38 Orofacial Pain Special Interest Group†. *J Oral Facial Pain Headache* 2014; 28(1): 6-27  
39  
40 35. Durham J, Newton-John TR ZJ. Temporomandibular disorders. *BMJ* 2015; 350: h1154  
41  
42 36. Van Dijk KD, Bidinosti M, Weiss A, Raijmakers P, Berendse HW, van de Berg WDJ. Reduced  $\alpha$ -synuclein levels in  
43 cerebrospinal fluid in Parkinson's disease are unrelated to clinical and imaging measures of disease severity. *Eur J*  
44 *Neurol* 2014; 21(3): 388-94  
45  
46 37. L. Naing, T. Winn, B.N. Rusli Practical Issues in Calculating the Sample Size for Prevalence Studies. *Archives of*  
47 *Orofacial Sciences* 2006; 1: 9-14  
48  
49 38. Berendse HW, Roos DS, Raijmakers P, Doty RL. Motor and non-motor correlates of olfactory dysfunction in  
50 Parkinson's disease. *J Neurol Sci* 2011; 310(1-2): 24-4  
51  
52 39. Ella B, Ghorayeb I, Burbaud P, Guehl D. Bruxism in Movement Disorders: A Comprehensive Review. *J Prosthodont*  
53 2017; 26(7): 599-605  
54  
55 40. Goldstein RE, Auclair Clark W. The clinical management of awake bruxism. *J Am Dent Assoc* 2017; 148(6): 387-391  
56  
57 41. Kawakami S, Kumazaki Y, Manda Y, Oki K, Minagi S. Specific diurnal EMG activity pattern observed in occlusal  
58 collapse patients: Relationship between diurnal bruxism and tooth loss progression. *PLoS One* 2014; 9(7): e101882  
59  
60 42. Kulisevsky J, Fernández de Bobadilla R, Pagonabarraga J, et al. Measuring functional impact of cognitive  
impairment: validation of the Parkinson's disease cognitive functional rating scale. *Parkinsonism Relat Disord*  
2013; 19(9): 812-7  
43. Lobbezoo F. Taking up challenges at the interface of wear and tear. *J Dent Res.* 2007 Feb;86(2):101-3.

- 1
- 2
- 3 44. Goetz CG, Tilley BC, Shaftman SR, et al. Movement Disorder Society-Sponsored Revision of the Unified Parkinson's
- 4 Disease Rating Scale (MDS-UPDRS): Scale presentation and clinimetric testing results. *Mov Disord* 2008; 23(15):
- 5 2129-70 .
- 6
- 7 45. Nasreddine ZS, Phillips NA, Bédirian V, et al. The Montreal Cognitive Assessment, MoCA: A brief screening tool for
- 8 mild cognitive impairment. *J Am Geriatr Soc* 2005; 53(4): 695-9
- 9
- 10 46. Postuma RB, Berg D, Stern M, et al. MDS clinical diagnostic criteria for Parkinson's disease. *Mov Disord* 2015;
- 11 30(12): 1591-601
- 12
- 13 47. Hoehn MM, Yahr MD. Parkinsonism : onset, progression, and mortality Parkinsonism: onset, progression, and
- 14 mortality. *Neurology* 1967; 17(5): 427-42
- 15
- 16 48. Tomlinson CL, Stowe R, Patel S, Rick C, Gray R, Clarke CE. Systematic review of levodopa dose equivalency
- 17 reporting in Parkinson's disease. *Mov Disord* 2010; 25(15): 2649-53
- 18
- 19 49. Beck AT, Steer RA, Brown GK. Manual for the Beck depression inventory-II. *San Antonio, TX Psychol Corp* 1996; 4:
- 20 561-571
- 21
- 22 50. Marin RS, Biedrzycki RC, Firinciogullari S. Reliability and validity of the apathy evaluation scale. *Psychiatry Res*
- 23 1991; 38(2): 143-62
- 24
- 25 51. Leentjens AFG, Dujardin K, Pontone GM, Starkstein SE, Weintraub D, Martinez-Martin P. The Parkinson anxiety
- 26 scale (PAS): Development and validation of a new anxiety scale. *Mov Disord* 2014; 29(8): 1035-1043
- 27
- 28 52. Voss T, Bahr D, Cummings J, Mills R, Ravina B, Williams H. Performance of a shortened Scale for Assessment of
- 29 Positive Symptoms for Parkinson's disease psychosis. *Park Relat Disord* 2013; 19(3): 295-9
- 30
- 31 53. Weintraub D, Mamikonyan E, Papay K, Shea JA, Xie SX, Siderowf A. Questionnaire for impulsive-compulsive
- 32 disorders in Parkinson's Disease-Rating Scale. *Mov Disord* 2012; 27(2): 242-7
- 33
- 34 54. Marinus J, Visser M, Van Hilten JJ, Lammers GJ, Stiggelbout AM. Assessment of sleep and sleepiness in parkinson
- 35 disease. *Sleep* 2003; 26(8): 1049-1054
- 36
- 37 55. Jonasson C, Wernersson B, Hoff DAL, Hatlebakk JG. Validation of the GerdQ questionnaire for the diagnosis of
- 38 gastro-oesophageal reflux disease. *Aliment Pharmacol Ther* 2013; 37(5): 564-72
- 39
- 40 56. Von Korff M, Ormel J, Keefe FJ, Dworkin SF. Grading the severity of chronic pain. *Pain* 1992; 50(2): 133-149
- 41
- 42 57. Chung F, Abdullah HR, Liao P. STOP-bang questionnaire a practical approach to screen for obstructive sleep apnea.
- 43 *Chest* 2016; 149(3): 631-638
- 44
- 45 58. Wetselaar P, Lobbezoo F. The tooth wear evaluation system: A modular clinical guideline for the diagnosis and
- 46 management planning of worn dentitions. *J Oral Rehabil* 2016; 43(1): 69-80
- 47
- 48 59. Das P, Challacombe SJ. Dry Mouth and Clinical Oral Dryness Scoring Systems. *Prim Dent J* 2016; 5(1): 77-79
- 49
- 50 60. Visscher CM, Naeije M, De Laat A, et al. Diagnostic accuracy of temporomandibular disorder pain tests: a
- 51 multicenter study. *J Orofac Pain* 2009; 23(2): 108-114
- 52
- 53 61. Bracci A, Djukic G, Favero L, Salmaso L, Guarda-Nardini L, Manfredini D. Frequency of awake bruxism behaviours in
- 54 the natural environment. A 7-day, multiple-point observation of real-time report in healthy young adults. *J Oral*
- 55 *Rehabil* 2018; 45(6): 423-429
- 56
- 57 62. Maldupa I, Brinkmane A, Mihailova A. Comparative analysis of CRT buffer, GC saliva check buffer tests and
- 58 laboratory titration to evaluate saliva buffering capacity. *Stomatologija* 2011; 13(2): 55-61
- 59
- 60 63. Stuginski-Barbosa J, Porporatti AL, Costa YM, Svensson P, Conti PCR. Diagnostic validity of the use of a portable
- single-channel electromyography device for sleep bruxism. *Sleep Breath* 2016; 20(2): 695-702
64. Olde Dubbelink KTE, Stoffers D, Deijen JB, Twisk JWR, Stam CJ, Berendse HW. Cognitive decline in Parkinson's
- disease is associated with slowing of resting-state brain activity: A longitudinal study. *Neurobiol Aging* 2013; 34(2):
- 408-18

- 1  
2  
3 65. Martínez-Martín P, Rodríguez-Blázquez C, Alvarez M, et al. Parkinson's disease severity levels and MDS-Unified  
4 Parkinson's Disease Rating Scale. *Park Relat Disord* 2015; 21(1): 50-4  
5  
6 66. Thissen AJAM, van Bergen F, de Jonghe JFM, Kessels RPC, Dautzenberg PLJ. Applicability and validity of the Dutch  
7 version of the Montreal Cognitive Assessment (moCA-d) in diagnosing MCI. *Tijdschr Gerontol Geriatr* 2010; 41(6):  
8 231-40  
9  
10 67. Ruzafa-Valiente E, Fernández-Bobadilla R, García-Sánchez C, Pagonabarraga J, Martínez-Horta S, Kulisevsky J.  
11 Parkinson's Disease - Cognitive Functional Rating Scale across different conditions and degrees of cognitive  
12 impairment. *J Neurol Sci* 2016; 361: 66-71  
13  
14 68. Beck A, Ward C, Mendelson M, Mock J, Erbaugh J. An inventory for measuring depression. *Arch Gen Psychiatry*  
15 1961; 4: 561-571  
16  
17 69. Bouman TK, Luteijn F, Albersnagel FA, der Ploeg Van. Enige ervaringen met de Beck depression inventory (BDI).  
18 *Gedrag Tijdschr voor Psychol* 1985; 13(2): 13-24  
19  
20 70. Fernandez HH, Aarsland D, Fénelon G, et al. Scales to assess psychosis in Parkinson's disease: Critique and  
21 recommendations. *Mov Disord* 2008; 23(4): 484-500  
22  
23 71. Lobbezoo F, Naeije M. A reliability study of clinical tooth wear measurements. *J Prosthet Dent* 2001; 86(6):597-602  
24  
25 72. Jenkinson C, Fitzpatrick R, Peto V, Greenhall R, Hyman N. The PDQ-8: Development and validation of a short-form  
26 Parkinson's disease questionnaire. *Psychol Heal* 1997; 12(6): 805-814  
27  
28 73. Kroenke K, Spitzer RL, Williams JBW. The PHQ-15: Validity of a new measure for evaluating the severity of somatic  
29 symptoms. *Psychosom Med* 2002; 64(2):258-66  
30  
31 74. Peduzzi P, Concato J, Kemper E, Holford TR, Feinstein AR. A simulation study of the number of events per variable  
32 in logistic regression analysis. *J Clin Epidemiol* 1996; 49(12): 1373-9  
33  
34 75. Field AP. *Discovering Statistics Using IBM SPSS Statistics: North American, 5th Edition*; 2017.  
35  
36  
37  
38  
39  
40  
41  
42  
43  
44  
45  
46  
47  
48  
49  
50  
51  
52  
53  
54  
55  
56  
57  
58  
59  
60



## Figure Legends

Figure 1. Visualization of the possible interactions between the different research variables. *Parkinson's Disease (PD) is associated with bruxism through different variables: the dopaminergic system (pathophysiology) plays a role in both conditions; the prodromal phase of PD (RBD) shows the same characteristics during sleep as does bruxism; sleep disturbances lead to micro-arousals that can lead to bruxism; dopaminergic medication (levodopa) can influence bruxism; depression is one of the risk factors for bruxism and is more prevalent in patients with PD; and finally, both PD and bruxism are regulated centrally and not peripherally. PD is also associated with TMD: PD patients experience pain in the entire body (i.e., widespread pain), which is a risk factor for TMD pain; also, musculoskeletal pain (as in TMD pain) is frequently present; and finally, alterations in the striatal dopaminergic system (D1/D2 ratio) could play a role in TMD pain. Bruxism itself is a risk factor for TMD pain and vice versa. Besides, tooth wear can be a consequence of bruxism. When bruxism occurs, saliva can be increased, which can be a protective factor for tooth wear. Also, saliva can be changed due to PD medication. Finally, several exogenic, psychogenic, and physiologic factors can be a risk for bruxism.*

Figure 2. Flowchart of the study in which a distinction was made between the attendance of participants at the hospital and the study components at the participant's home. The intake and first survey is part of the regular care at the hospital, and only followed by an additional MRI and/or DAT-SPECT scan when indicated (dashed line). When patients are eligible and consent to participate (screening by phone), the additional data are collected after the intake. First, a questionnaire is filled in by the participants. After that, the participant is invited for the clinical examination. When questionnaires/screenings that are part of the regular care were filled in  $\geq 1$  year ago, participants will be asked to repeat this procedure simultaneously with the additional questionnaire and/or clinical examination. Finally, participants will sleep for 5 complete registration nights with the GrindCare for the assessment of sleep bruxism (when exclusion criterion 2 was not met) and use the BruxApp for 5 complete registration days for the assessment of awake bruxism (when exclusion criterion 3 was not met).

Figure 3. Flowchart of the data-analysis related to the first secondary aim: "to investigate which factors are influencing the presence of probable awake/sleep bruxism, TMD pain and the frequency of definite awake/sleep bruxism". All variables will be tested individually to see whether an association with the dependent variable (awake and sleep bruxism and TMD pain) exists, and to see how strong this association is (step 1). This dataset will be analysed for both probable bruxism and TMD pain with the use of logistic regression analyses. For definite bruxism, a linear regression analysis will be used (step 2). The forward selection procedure will be used for the (strongest) independent variables until all variables in this regression model show a  $P$ -value  $< 0.05$  (step 2). In both step 1 and step 2, a distinction will be made between sleep and awake bruxism.

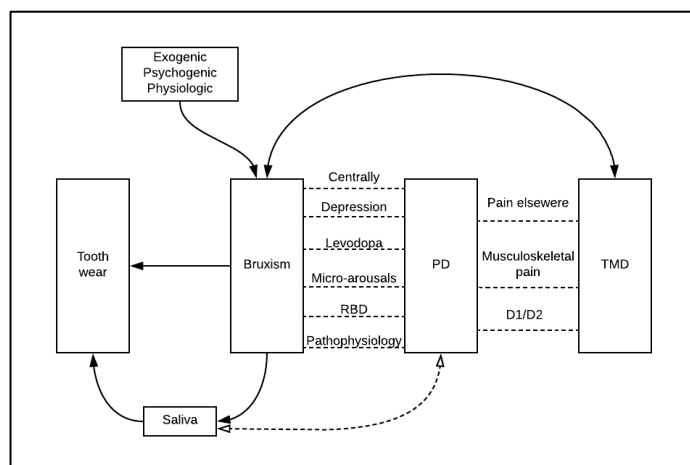

Figure 1. Visualization of the possible interactions between the different research variables. *Parkinson’s Disease (PD)* is associated with bruxism through different variables: the dopaminergic system (pathophysiology) plays a role in both conditions; the prodromal phase of PD (RBD) shows the same characteristics during sleep as does bruxism; sleep disturbances lead to micro-arousals that can lead to bruxism; dopaminergic medication (levodopa) can influence bruxism; depression is one of the risk factors for bruxism and is more prevalent in patients with PD; and finally, both PD and bruxism are regulated centrally and not peripherally. PD is also associated with TMD: PD patients experience pain in the entire body (i.e., widespread pain), which is a risk factor for TMD pain; also, musculoskeletal pain (as in TMD pain) is frequently present; and finally, alterations in the striatal dopaminergic system (D1/D2 ratio) could play a role in TMD pain. Bruxism itself is a risk factor for TMD pain and vice versa. Besides, tooth wear can be a consequence of bruxism. When bruxism occurs, saliva can be increased, which can be a protective factor for tooth wear. Also, saliva can be changed due to PD medication. Finally, several exogenic, psychogenic, and physiologic factors can be a risk for bruxism.

view only

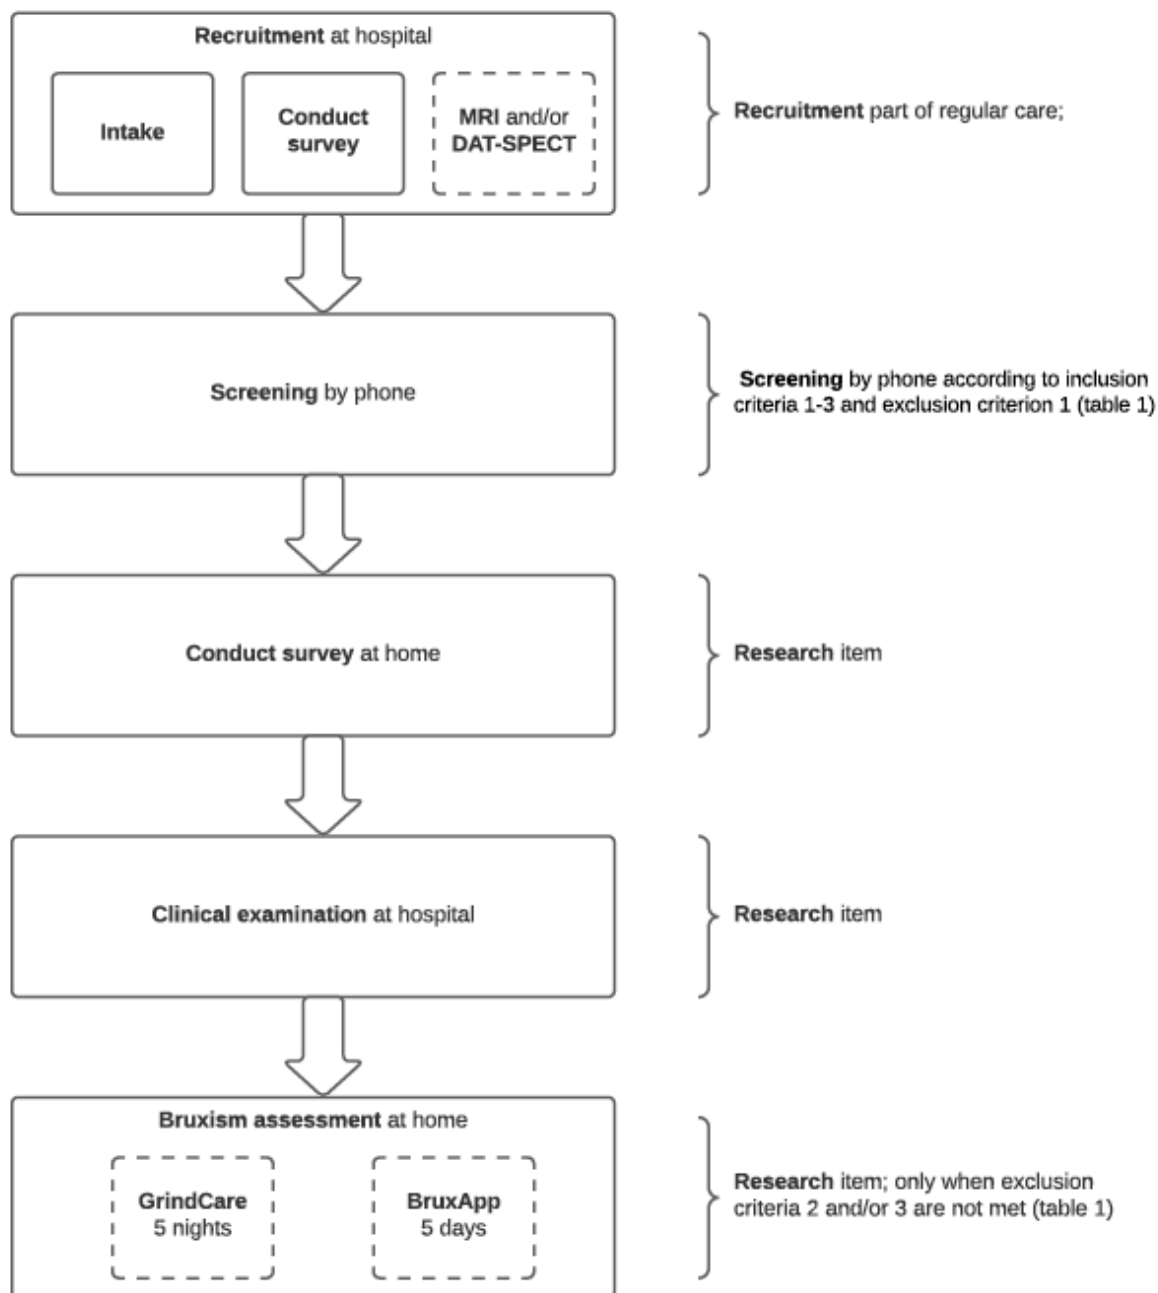

Figure 2. Flowchart of the study in which a distinction was made between the attendance of participants at the hospital and the study components at the participant's home. The intake and first survey is part of the regular care at the hospital, and only followed by an additional MRI and/or DAT-SPECT scan when indicated (dashed line). When patients are eligible and consent to participate (screening by phone), the additional data are collected after the intake. First, a questionnaire is filled in by the participants. After that, the participant is invited for the clinical examination. When questionnaires/screenings that are part of the regular care were filled in  $\geq 1$  year ago, participants will be asked to repeat this procedure simultaneously with the additional questionnaire and/or clinical examination. Finally, participants will sleep for 5 complete registration nights with the GrindCare for the assessment of sleep bruxism (when exclusion criterion 2 was not met) and use the BruxApp for 5 complete registration days for the assessment of awake bruxism (when exclusion criterion 3 was not met).

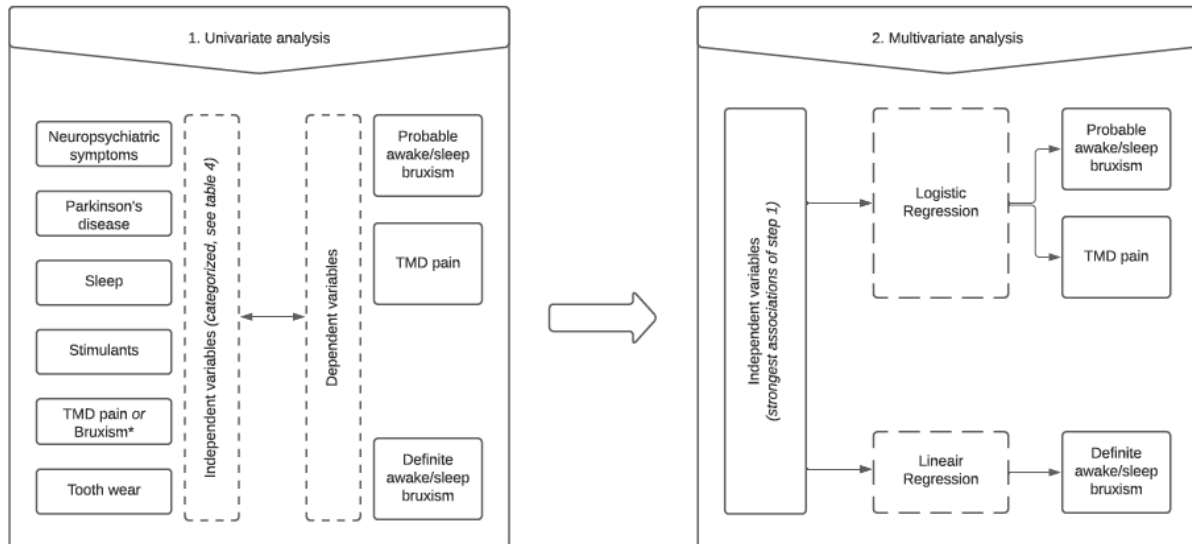

Figure 3. Flowchart of the data-analysis related to the first secondary aim: “to investigate which factors are influencing the presence of probable awake/sleep bruxism, TMD pain and the frequency of definite awake/sleep bruxism”. All variables will be tested individually to see whether an association with the dependent variable (awake and sleep bruxism and TMD pain) exists, and to see how strong this association is (step 1). This dataset will be analysed for both probable bruxism and TMD pain with the use of logistic regression analyses. For definite bruxism, a linear regression analysis will be used (step 2). The forward selection procedure will be used for the (strongest) independent variables until all variables in this regression model show a P-value <0.05 (step 2). In both step 1 and step 2, a distinction will be made between sleep and awake bruxism.

## Appendix 1

All secondary study parameters are listed below, along with a description of the questionnaires/ instruments that will be used for their assessment.

### General disease information:

- Disease severity: see motor symptoms.
- Disease stage: will be established with the Hoehn & Yahr scale. This is a 0 to 5 scale: “asymptomatic (score 0)”, “only unilateral involvement (score 1)”, “bilateral involvement without impairment of balance (score 2)”, “light to mild bilateral involvement, some postural instability and physically independent (score 3)”, “severe disability, still able to walk independent (score 4)”, and “wheelchair or bed bounded without help (score 5)”, in which a higher number means a more developed disease stage<sup>46</sup>.
- Levodopa equivalent daily dosage (LEDD): this is, according to Tomlinson, a “summation of each individual antiparkinsonian drug aligned to 100mg immediate release L-dopa, by means of individual conversion factors”<sup>48,64</sup>.
- Presynaptic dopaminergic loss: will be analysed by means of DAT-SPECT, when applicable.

### Motor symptoms:

- Motor symptoms: will be analysed with the Movement Disorder Society Unified Parkinson Disease Rating Scale III (MDS-UPDRS III)<sup>44</sup>. This involves an examination of motor function, performed by an examiner (e.g., neurologist, trained nurse, or trained research assistant). The patient has to complete 18 motoric tasks. Subsequently, the examiner scores the tasks from 0 till 4: “normal (score 0)”, “slight (score 1)”, “mild (score 2)”, “moderate (score 3)”, and “severe (score 4)” motor problems for that specific part. Finally, a summation of each individual task is established, after that a classification can be made: “mild (score  $\leq$  32)”, “moderate (score 33-58)”, and “severe (score  $\geq$  59)” motor problems<sup>65</sup>.

### Non-motor symptoms:

- Anxiety: will be registered through the Parkinson Anxiety Scale (PAS)<sup>51</sup>. The PAS consists of 3 questionnaires (persistent anxiety, episodic anxiety, and avoidance behavior), with in total 12 questions. There are 5 response options, scored as 0 till 4: “never (score 0)”, “occasionally (score 1)”, “sometimes (score 2)”, “frequently (score 3)”, and “always (score 4)”. Afterwards, 4 groups can be made: “generalized anxiety disorder (score  $\geq$  11 on that subscale)”, “episodic anxiety (score  $\geq$  6 on that subscale)”, “avoidance behavior (score  $\geq$  5 on that subscale)”, and “any anxiety disorder score (score  $\geq$  14)”.
- Apathy: will be measured by means of the apathy evaluation scale (AES)<sup>50</sup>. This scale has 14 statements, with 4 response options: “not at all (score 0)”, “slightly (score 1)”, “somewhat (score 2)”, and “a lot (score 3)”. A total sum score of 42 can be reached. When a higher score is reached, apathy plays a bigger role. The cut off point for “high apathy score” is 14 points.
- Cognitive function: will be analysed by means of the Montreal Cognitive Assessment (MoCA)<sup>44,66</sup> and the Parkinson’s Disease Cognitive Functional Rating Scale, (PD-CFRS)<sup>42,67</sup>. The MoCA is a screening instrument for cognitive dysfunctions on different aspects, such as memory or language, which exist of 11 items in 8 different domains. The examiner (e.g., neurologist, trained nurse, or trained research assistant). scores

each item individually. A sum score of 30 can be reached, wherein a score of 26 or above represents a normal cognitive function and a score above 21 represents a mild cognitive impairment. The PD-CFRS exists of 12 questions with four response options, scored as follows: “No (score 0)”, “Sometimes (score 1)”, “A lot (score 2)” and “not applicable”. All questions answered with “not applicable” will be scored with the mean of all the other questions. A total score of 0-24 can be reached, a higher score means more cognitive problems. The total score will be used.

- Depression: will be registered through the Beck Depression Inventory (BDI-II)<sup>69,69</sup>. The BDI-II exists of 21 questions with four response options, scored as 0 till 4 (for example: “I do not feel sad”, “I feel sad much of the time”, “I am sad the whole time”, and “I am sad or so unhappy that I can’t stand it”). A maximum of 63 points can be assembled. Afterwards, 4 groups can be made: “none or minimal (score 0-13)”, “light (score 14-19)”, “moderate (score 20-28)”, and “severe (score 29-63)” depressive symptoms.
- Impulsive-compulsive behavior: will be analysed by means of the Questionnaire for Impulsive-Compulsive Disorders in Parkinson's Disease-Rating Scale (QUIP-RS)<sup>53</sup>. This questionnaire has 7 subscales and in total 28 questions, with 5 response options scored 0 till 4: “never (score 0)”, “occasionally (score 1)”, “sometimes (score 2)”, “frequently (score 3)”, and “a lot (score 3)”. For a combined impulse control disorder, 4 subscales are combined. A total sum score of 64 can be reached, a higher score indicating more impulsive-compulsive behavior. When 10 points or above are registered, an impulse control disorder is present.
- Psychosis: will be measured by means of Parkinson’s disease-adapted scale for assessment of positive symptoms (SAPS-PD)<sup>70</sup>. This 9-item observer-rated scale is scored from 0 till 5: “none (score 0)”, “possible (score 1)”, “mild (score 2)”, “mediocre (score 3)”, “explicit (score 4)”, and “severe (score 5)”, including a part about hallucinations and a part about disillusions. A higher sum score means a probable presence of psychosis. The total score will be used.
- Quality of sleep: is analysed by means of two types of questionnaires that are used in this study to assess this construct. The STOP-BANG-NL<sup>57</sup> questionnaire that screens for the risk for moderate to severe obstructive sleep apnea (OSA), and the Scales for Outcomes PD Sleep (SCOPA-sleep)<sup>54</sup> that screens for quality of sleep during the night and sleepiness during the day. The STOP-BANG-NL consists of 8 questions, with 2 response options: yes (score 1) and no (score 0). The total score ranges from 0-8, a classification can be made: “low risk for OSA (score < 3)”, “intermediate risk (score 3-4)” and “severe risk for OSA (≥ 5)”<sup>57</sup>. The SCOPA-Sleep questionnaire consists of 6 questions about daytime sleepiness, with 4 response options scored from 0 till 3: “never (score 0)”, “sometimes (score 1)”, “frequently (score 2)”, and “a lot (score 3)”, and 5 questions about night time sleep, with 4 response options scored from 0 till 3: “not at all (score 0)”, “somewhat (score 1)”, “quite (score 2)”, and “a lot (score 3)”. A higher score means more daytime sleepiness and/or more nighttime sleep problems.

#### **Oral health and dysfunction:**

- Reflux: will be analysed with the Gastroesophageal Reflux Disease Questionnaire (GERD-Q NL)<sup>55</sup>. This is a self-administered questionnaire with 4 graded Likert scales scored from 0-3 for predictors of GERD, and 2

reverse Likert scales scored from 3-0 for negative predictors of GERD. The response options are as follows: "0 days (score 0 or 3)", "1 day (score 1 or 2)", "2-3 days (score 2 or 1)", and "4-7 days (score 3 or 0)" dependent on a (reverse) likert scale. When a score of  $\geq 8$  is reached, there is a suspicion for GERD.

- Saliva: based on the Saliva Check Buffer© (GC EUROPE N.V), the quantity and quality (pH and buffer capacity) of saliva will be screened<sup>62</sup>. The buffer capacity stands for the capability of saliva to neutralize the environment of the mouth. Both saliva in rest and saliva that is stimulated during chewing will be investigated. An overview of the normal values is given in appendix 3. Additionally, in the clinical examination, a dry mouth screening by means of the Clinical Oral Dryness Score (CODS) will be performed, which includes a 10-item observer-rated dichotomous outcome questionnaire: "present (score 1)" and "absent (score 0)". When a summation is performed, the following cut-off points are applicable: "mild dryness (score 0-3)", "moderate dryness (score 4-6)", and "severe dryness (score >6)".
- TMD-pain intensity: will be analysed with the use of the Graded Chronic Pain Scale (GCPS)<sup>56</sup>. This is a 7-item questionnaire. Six items have an ordinal scale from 0 till 10, in which 0 stands for "no pain" and 10 for "the worst pain ever". Additionally, the amount of days that where disabling because of the pain in the last 30 days are noted. When scoring, 5 classifications can be made: "no pain (grade 0)", "low disability, low intensity (grade 1)", "low disability, high intensity (grade 2)", "high disability, moderately limiting (grade 3)", and "high disability-severely limiting (grade 4)".
- Tooth Wear: will be analysed with the screening module of the Tooth Wear Screening Index (TWES)<sup>58</sup> that quantifies the amount of tooth wear in 6 sextants of the mouth (right side, front, and left side of the upper jaw and the lower jaw) from 0 till 4: "no wear (score 0)", "visible wear within the enamel (score 1)", "visible wear with dentin exposure and loss of clinical crown height of  $\leq 1/3$  (score 2)", "loss of crown height  $>1/3$  but  $<2/3$  (score 3)" and "loss of crown height  $\geq 2/3$  (score 4)"<sup>71</sup>. Additionally, the palatal side of the upper front is also graded from 0 till 2: "no tooth wear (score 0)", "tooth wear confined to the enamel (score 1)", and "tooth wear with dentin exposure (score 2)". All numbers are scored per tooth and are not summed. The highest number will be used for analysis.

#### Miscellaneous:

- Lifestyle factors (smoking, alcohol, drugs): will be gathered by means of self-report in the standard-care questionnaire of the VUmc. Use of alcohol is noted as units per week. In case of smoking and use of drugs will be both quantified as a nominal variable (participants do (not) smoke and/or use drugs).
- Quality of life: will be analysed with the Parkinson's Disease Questionnaire – 8 (PDQ-8)<sup>72</sup>, by means of 8 questions about quality of life regarding PD. Participants can answer at an ordinal 5-item scale, with scores from 0 till 4: "Never (score 0)", "Occasionally (score 1)", "Sometimes (score 2)", "Often (score 3)", and "Always (score 4)". A score from 0 till 32 can be reached. When a higher score is applicable, poor health-related quality of life is present. The total score will be used.
- Somatic symptoms: will be analysed with the Patient Health Questionnaire – 15 (PHQ15)<sup>73</sup>. Severity of somatization is evaluated by means of 13 questions about somatic symptoms divided in 3 subscales, with scores 0 till 2: "not at all (score 0)", "bothered a little (score 1)", and "bothered a lot (score 2)". Additionally, two questions about sleep and tiredness are present, which are also divided in 3 subscales

with scores 0 till 2: “not at all (score 0)”, “several days (score 1)”, and “more than half of the days/nearly every day (score 2)”. Scores of 0, 5, and 15 are the cut-off points for “low”, “median”, and “high somatic symptom severity”, respectively.

## Appendix 2

The following formula was used for the sample size calculation:

$$n = (Z^2P(1-P))/d^2$$

Z = Z statistic for a level of confidence

P = expected prevalence or proportion (in proportion of one)

d = precision

For the level of confidence of 95%, Z value is 1.96.

With an assumed prevalence of 46% (WB according pilot study), P is 0.46

With a precision of +/-5 percentage points (0.05), d should be set at 0.05.

The numbers for the secondary aims are obtained when reaching the sample size for the primary aim. The approach for the sample size calculation of the secondary aims are as follows:

Since no clinical data of the variables that will be studied are available yet in a population with PD, an effect size is not known for our outcome measures. Nevertheless, in a recent questionnaire-based study, an association between PD on the one hand and bruxism and TMD pain on the other was reported<sup>25</sup>. The prevalence found for these outcome measures were **46.0%, 24.3%, and 29.5%** for awake bruxism, sleep bruxism, and TMD pain, respectively. In the current study, a total of 6 independent categorized variables (see Table 4) will be analysed to determine if they are associated with the presence of probable and definite bruxism and/or TMD pain in patients with PD, by means of logistic and linear regression analyses (see statistical approach). We assume that only four predictors will be eligible for multivariate analysis, because (i) only predictors with the strongest associations are included, and (ii) predictors will drop out due to their probable association with each other. The literature about numbers of observations in participants per variable (events) in a logistic regression analysis indicated that for each predictor in a regression analysis, data from 10-20 events is needed<sup>73</sup>. Consequently, 15 events are chosen and thus (4x15=) 60 events are needed. Based on the prevalence of the recent questionnaire-based pilot study<sup>25</sup>, a minimum of 130 participants (60 events/0.46 (= prevalence of awake bruxism)) and a maximum of 246 participants (60 events/0.243 (=prevalence of sleep bruxism)) are needed<sup>25</sup>. For the linear regression, this estimate of the sample size is sufficient to detect medium and large effect sizes<sup>75</sup>. Because this is a wide range, an interim analysis will be done after the inclusion of at least 130 participants or a maximum of 6 months.



### Appendix 3

Cut off points for Saliva Check Buffer (GC EUROPE N.V), to determine whether the quantity and composition of saliva deviate from normal values.

| <u>Saliva type</u> | <u>Volume (ml)</u> | <u>interpretation</u> | <u>pH</u>  | <u>interpretation</u> | <u>Buffercapacity</u> | <u>Interpretation</u> |
|--------------------|--------------------|-----------------------|------------|-----------------------|-----------------------|-----------------------|
| During rest        | 1. >0.50           | 1. Hypersalivation    | 1. >7.5    | 1. Abnormal           | 1. 10-12              | 1. Normal/high        |
|                    | 2. 0.50-0.25       | 2. Normal             | 2. 7.5-6.8 | 2. Normal             | 2. 6-9                | 2. Low                |
|                    | 3. 0.24-0.10       | 3. Risk               | 3. 6.7-6.5 | 3. Risk               | 3. 0.5                | 3. Very low           |
|                    | 4. <0.10           | 4. Pathologic         | 4. <6.5    | 4. Pathologic         |                       |                       |
| During chewing     | 1. >2.00           | 1. Hypersalivation    | 1. >8.0    | 1. Abnormal           | 1. 10-12              | 1. Normal/high        |
|                    | 2. 2.00-0.75       | 2. Normal             | 2. 8.0-7.0 | 2. Normal             | 2. 6-9                | 2. Low                |
|                    | 3. 0.74-0.50       | 3. Risk               | 3. 6.9-6.5 | 3. Risk               | 3. 0-5                | 3. Very low           |
|                    | 4. <0.50           | 4. Pathologic         | 4. <6.5    | 4. Pathologic         |                       |                       |

# Reporting checklist for protocol of a clinical trial.

Based on the SPIRIT guidelines.

## Instructions to authors

Complete this checklist by entering the page numbers from your manuscript where readers will find each of the items listed below.

Your article may not currently address all the items on the checklist. Please modify your text to include the missing information. If you are certain that an item does not apply, please write "n/a" and provide a short explanation.

Upload your completed checklist as an extra file when you submit to a journal.

In your methods section, say that you used the SPIRIT reporting guidelines, and cite them as:

Chan A-W, Tetzlaff JM, Altman DG, Laupacis A, Gøtzsche PC, Krleža-Jerić K, Hróbjartsson A, Mann H, Dickersin K, Berlin J, Doré C, Parulekar W, Summerskill W, Groves T, Schulz K, Sox H, Rockhold FW, Rennie D, Moher D. SPIRIT 2013 Statement: Defining standard protocol items for clinical trials. *Ann Intern Med.* 2013;158(3):200-207

|                                             |                     | Reporting Item                                                                                               | Page Number |
|---------------------------------------------|---------------------|--------------------------------------------------------------------------------------------------------------|-------------|
| <b>Administrative information</b>           |                     |                                                                                                              |             |
| Title                                       | <a href="#">#1</a>  | Descriptive title identifying the study design, population, interventions, and, if applicable, trial acronym | 1           |
| Trial registration                          | <a href="#">#2a</a> | Trial identifier and registry name. If not yet registered, name of intended registry                         | 1           |
| Trial registration: data set                | <a href="#">#2b</a> | All items from the World Health Organization Trial Registration Data Set                                     | 1           |
| Protocol version                            | <a href="#">#3</a>  | Date and version identifier                                                                                  | 1           |
| Funding                                     | <a href="#">#4</a>  | Sources and types of financial, material, and other support                                                  | 7           |
| Roles and responsibilities: contributorship | <a href="#">#5a</a> | Names, affiliations, and roles of protocol contributors                                                      | 7           |

|    |                           |                     |                                                                    |     |
|----|---------------------------|---------------------|--------------------------------------------------------------------|-----|
| 1  | Roles and                 | <a href="#">#5b</a> | Name and contact information for the trial sponsor                 | 7-8 |
| 2  | responsibilities:         |                     |                                                                    |     |
| 3  | sponsor contact           |                     |                                                                    |     |
| 4  | information               |                     |                                                                    |     |
| 5  |                           |                     |                                                                    |     |
| 6  |                           |                     |                                                                    |     |
| 7  |                           |                     |                                                                    |     |
| 8  | Roles and                 | <a href="#">#5c</a> | Role of study sponsor and funders, if any, in study design;        | 7-8 |
| 9  | responsibilities:         |                     | collection, management, analysis, and interpretation of data;      |     |
| 10 | sponsor and funder        |                     | writing of the report; and the decision to submit the report for   |     |
| 11 |                           |                     | publication, including whether they will have ultimate authority   |     |
| 12 |                           |                     | over any of these activities                                       |     |
| 13 |                           |                     |                                                                    |     |
| 14 |                           |                     |                                                                    |     |
| 15 |                           |                     |                                                                    |     |
| 16 | Roles and                 | <a href="#">#5d</a> | Composition, roles, and responsibilities of the coordinating       | n/a |
| 17 | responsibilities:         |                     | centre, steering committee, endpoint adjudication committee,       |     |
| 18 | committees                |                     | data management team, and other individuals or groups              |     |
| 19 |                           |                     | overseeing the trial, if applicable (see Item 21a for data         |     |
| 20 |                           |                     | monitoring committee)                                              |     |
| 21 |                           |                     |                                                                    |     |
| 22 |                           |                     |                                                                    |     |
| 23 |                           |                     |                                                                    |     |
| 24 | <b>Introduction</b>       |                     |                                                                    |     |
| 25 |                           |                     |                                                                    |     |
| 26 |                           |                     |                                                                    |     |
| 27 | Background and            | <a href="#">#6a</a> | Description of research question and justification for undertaking | 2-3 |
| 28 | rationale                 |                     | the trial, including summary of relevant studies (published and    |     |
| 29 |                           |                     | unpublished) examining benefits and harms for each intervention    |     |
| 30 |                           |                     |                                                                    |     |
| 31 |                           |                     |                                                                    |     |
| 32 | Background and            | <a href="#">#6b</a> | Explanation for choice of comparators                              | 4   |
| 33 | rationale: choice of      |                     |                                                                    |     |
| 34 | comparators               |                     |                                                                    |     |
| 35 |                           |                     |                                                                    |     |
| 36 |                           |                     |                                                                    |     |
| 37 | Objectives                | <a href="#">#7</a>  | Specific objectives or hypotheses                                  | 3   |
| 38 |                           |                     |                                                                    |     |
| 39 |                           |                     |                                                                    |     |
| 40 | Trial design              | <a href="#">#8</a>  | Description of trial design including type of trial (eg, parallel  | 4   |
| 41 |                           |                     | group, crossover, factorial, single group), allocation ratio, and  |     |
| 42 |                           |                     | framework (eg, superiority, equivalence, non-inferiority,          |     |
| 43 |                           |                     | exploratory)                                                       |     |
| 44 |                           |                     |                                                                    |     |
| 45 |                           |                     |                                                                    |     |
| 46 | <b>Methods:</b>           |                     |                                                                    |     |
| 47 | <b>Participants,</b>      |                     |                                                                    |     |
| 48 | <b>interventions, and</b> |                     |                                                                    |     |
| 49 | <b>outcomes</b>           |                     |                                                                    |     |
| 50 |                           |                     |                                                                    |     |
| 51 |                           |                     |                                                                    |     |
| 52 |                           |                     |                                                                    |     |
| 53 | Study setting             | <a href="#">#9</a>  | Description of study settings (eg, community clinic, academic      | 4   |
| 54 |                           |                     | hospital) and list of countries where data will be collected.      |     |
| 55 |                           |                     | Reference to where list of study sites can be obtained             |     |
| 56 |                           |                     |                                                                    |     |
| 57 |                           |                     |                                                                    |     |
| 58 |                           |                     |                                                                    |     |
| 59 |                           |                     |                                                                    |     |
| 60 |                           |                     |                                                                    |     |

|    |                              |                      |                                                                                                                                                                                                                                                                                                                                                                                |               |
|----|------------------------------|----------------------|--------------------------------------------------------------------------------------------------------------------------------------------------------------------------------------------------------------------------------------------------------------------------------------------------------------------------------------------------------------------------------|---------------|
| 1  | Eligibility criteria         | <a href="#">#10</a>  | Inclusion and exclusion criteria for participants. If applicable, eligibility criteria for study centres and individuals who will perform the interventions (eg, surgeons, psychotherapists)                                                                                                                                                                                   | 4             |
| 2  |                              |                      |                                                                                                                                                                                                                                                                                                                                                                                |               |
| 3  |                              |                      |                                                                                                                                                                                                                                                                                                                                                                                |               |
| 4  |                              |                      |                                                                                                                                                                                                                                                                                                                                                                                |               |
| 5  |                              |                      |                                                                                                                                                                                                                                                                                                                                                                                |               |
| 6  | Interventions:               | <a href="#">#11a</a> | Interventions for each group with sufficient detail to allow replication, including how and when they will be administered                                                                                                                                                                                                                                                     | n/a           |
| 7  | description                  |                      |                                                                                                                                                                                                                                                                                                                                                                                |               |
| 8  |                              |                      |                                                                                                                                                                                                                                                                                                                                                                                |               |
| 9  |                              |                      |                                                                                                                                                                                                                                                                                                                                                                                |               |
| 10 | Interventions:               | <a href="#">#11b</a> | Criteria for discontinuing or modifying allocated interventions for a given trial participant (eg, drug dose change in response to harms, participant request, or improving / worsening disease)                                                                                                                                                                               | n/a           |
| 11 | modifications                |                      |                                                                                                                                                                                                                                                                                                                                                                                |               |
| 12 |                              |                      |                                                                                                                                                                                                                                                                                                                                                                                |               |
| 13 |                              |                      |                                                                                                                                                                                                                                                                                                                                                                                |               |
| 14 |                              |                      |                                                                                                                                                                                                                                                                                                                                                                                |               |
| 15 | Interventions:               | <a href="#">#11c</a> | Strategies to improve adherence to intervention protocols, and any procedures for monitoring adherence (eg, drug tablet return; laboratory tests)                                                                                                                                                                                                                              | n/a           |
| 16 | adherence                    |                      |                                                                                                                                                                                                                                                                                                                                                                                |               |
| 17 |                              |                      |                                                                                                                                                                                                                                                                                                                                                                                |               |
| 18 |                              |                      |                                                                                                                                                                                                                                                                                                                                                                                |               |
| 19 |                              |                      |                                                                                                                                                                                                                                                                                                                                                                                |               |
| 20 | Interventions:               | <a href="#">#11d</a> | Relevant concomitant care and interventions that are permitted or prohibited during the trial                                                                                                                                                                                                                                                                                  | n/a           |
| 21 | concomitant care             |                      |                                                                                                                                                                                                                                                                                                                                                                                |               |
| 22 |                              |                      |                                                                                                                                                                                                                                                                                                                                                                                |               |
| 23 |                              |                      |                                                                                                                                                                                                                                                                                                                                                                                |               |
| 24 | Outcomes                     | <a href="#">#12</a>  | Primary, secondary, and other outcomes, including the specific measurement variable (eg, systolic blood pressure), analysis metric (eg, change from baseline, final value, time to event), method of aggregation (eg, median, proportion), and time point for each outcome. Explanation of the clinical relevance of chosen efficacy and harm outcomes is strongly recommended | 4,5,9-15      |
| 25 |                              |                      |                                                                                                                                                                                                                                                                                                                                                                                |               |
| 26 |                              |                      |                                                                                                                                                                                                                                                                                                                                                                                |               |
| 27 |                              |                      |                                                                                                                                                                                                                                                                                                                                                                                |               |
| 28 |                              |                      |                                                                                                                                                                                                                                                                                                                                                                                |               |
| 29 |                              |                      |                                                                                                                                                                                                                                                                                                                                                                                |               |
| 30 |                              |                      |                                                                                                                                                                                                                                                                                                                                                                                |               |
| 31 |                              |                      |                                                                                                                                                                                                                                                                                                                                                                                |               |
| 32 |                              |                      |                                                                                                                                                                                                                                                                                                                                                                                |               |
| 33 |                              |                      |                                                                                                                                                                                                                                                                                                                                                                                |               |
| 34 | Participant timeline         | <a href="#">#13</a>  | Time schedule of enrolment, interventions (including any run-ins and washouts), assessments, and visits for participants. A schematic diagram is highly recommended (see Figure)                                                                                                                                                                                               | 4,5<br>(+fig) |
| 35 |                              |                      |                                                                                                                                                                                                                                                                                                                                                                                |               |
| 36 |                              |                      |                                                                                                                                                                                                                                                                                                                                                                                |               |
| 37 |                              |                      |                                                                                                                                                                                                                                                                                                                                                                                |               |
| 38 |                              |                      |                                                                                                                                                                                                                                                                                                                                                                                |               |
| 39 |                              |                      |                                                                                                                                                                                                                                                                                                                                                                                |               |
| 40 | Sample size                  | <a href="#">#14</a>  | Estimated number of participants needed to achieve study objectives and how it was determined, including clinical and statistical assumptions supporting any sample size calculations                                                                                                                                                                                          | 5             |
| 41 |                              |                      |                                                                                                                                                                                                                                                                                                                                                                                |               |
| 42 |                              |                      |                                                                                                                                                                                                                                                                                                                                                                                |               |
| 43 |                              |                      |                                                                                                                                                                                                                                                                                                                                                                                |               |
| 44 |                              |                      |                                                                                                                                                                                                                                                                                                                                                                                |               |
| 45 | Recruitment                  | <a href="#">#15</a>  | Strategies for achieving adequate participant enrolment to reach target sample size                                                                                                                                                                                                                                                                                            | 4-5           |
| 46 |                              |                      |                                                                                                                                                                                                                                                                                                                                                                                |               |
| 47 |                              |                      |                                                                                                                                                                                                                                                                                                                                                                                |               |
| 48 |                              |                      |                                                                                                                                                                                                                                                                                                                                                                                |               |
| 49 | <b>Methods: Assignment</b>   |                      |                                                                                                                                                                                                                                                                                                                                                                                |               |
| 50 | <b>of interventions (for</b> |                      |                                                                                                                                                                                                                                                                                                                                                                                |               |
| 51 | <b>controlled trials)</b>    |                      |                                                                                                                                                                                                                                                                                                                                                                                |               |
| 52 |                              |                      |                                                                                                                                                                                                                                                                                                                                                                                |               |
| 53 |                              |                      |                                                                                                                                                                                                                                                                                                                                                                                |               |
| 54 | Allocation: sequence         | <a href="#">#16a</a> | Method of generating the allocation sequence (eg, computer-generated random numbers), and list of any factors for stratification. To reduce predictability of a random sequence, details of any planned restriction (eg, blocking) should be                                                                                                                                   | n/a           |
| 55 | generation                   |                      |                                                                                                                                                                                                                                                                                                                                                                                |               |
| 56 |                              |                      |                                                                                                                                                                                                                                                                                                                                                                                |               |
| 57 |                              |                      |                                                                                                                                                                                                                                                                                                                                                                                |               |
| 58 |                              |                      |                                                                                                                                                                                                                                                                                                                                                                                |               |
| 59 |                              |                      |                                                                                                                                                                                                                                                                                                                                                                                |               |
| 60 |                              |                      |                                                                                                                                                                                                                                                                                                                                                                                |               |

provided in a separate document that is unavailable to those who enrol participants or assign interventions

|                                                           |                      |                                                                                                                                                                                                                                                                                                                                                                                                              |     |
|-----------------------------------------------------------|----------------------|--------------------------------------------------------------------------------------------------------------------------------------------------------------------------------------------------------------------------------------------------------------------------------------------------------------------------------------------------------------------------------------------------------------|-----|
| Allocation concealment mechanism                          | <a href="#">#16b</a> | Mechanism of implementing the allocation sequence (eg, central telephone; sequentially numbered, opaque, sealed envelopes), describing any steps to conceal the sequence until interventions are assigned                                                                                                                                                                                                    | n/a |
| Allocation: implementation                                | <a href="#">#16c</a> | Who will generate the allocation sequence, who will enrol participants, and who will assign participants to interventions                                                                                                                                                                                                                                                                                    | n/a |
| Blinding (masking)                                        | <a href="#">#17a</a> | Who will be blinded after assignment to interventions (eg, trial participants, care providers, outcome assessors, data analysts), and how                                                                                                                                                                                                                                                                    | n/a |
| Blinding (masking): emergency unblinding                  | <a href="#">#17b</a> | If blinded, circumstances under which unblinding is permissible, and procedure for revealing a participant's allocated intervention during the trial                                                                                                                                                                                                                                                         | n/a |
| <b>Methods: Data collection, management, and analysis</b> |                      |                                                                                                                                                                                                                                                                                                                                                                                                              |     |
| Data collection plan                                      | <a href="#">#18a</a> | Plans for assessment and collection of outcome, baseline, and other trial data, including any related processes to promote data quality (eg, duplicate measurements, training of assessors) and a description of study instruments (eg, questionnaires, laboratory tests) along with their reliability and validity, if known. Reference to where data collection forms can be found, if not in the protocol | 4-5 |
| Data collection plan: retention                           | <a href="#">#18b</a> | Plans to promote participant retention and complete follow-up, including list of any outcome data to be collected for participants who discontinue or deviate from intervention protocols                                                                                                                                                                                                                    | n/a |
| Data management                                           | <a href="#">#19</a>  | Plans for data entry, coding, security, and storage, including any related processes to promote data quality (eg, double data entry; range checks for data values). Reference to where details of data management procedures can be found, if not in the protocol                                                                                                                                            | n/a |
| Statistics: outcomes                                      | <a href="#">#20a</a> | Statistical methods for analysing primary and secondary outcomes. Reference to where other details of the statistical analysis plan can be found, if not in the protocol                                                                                                                                                                                                                                     | 5   |

|    |                            |                      |                                                                    |     |
|----|----------------------------|----------------------|--------------------------------------------------------------------|-----|
| 1  | Statistics: additional     | <a href="#">#20b</a> | Methods for any additional analyses (eg, subgroup and adjusted     | 5   |
| 2  | analyses                   |                      | analyses)                                                          |     |
| 3  |                            |                      |                                                                    |     |
| 4  | Statistics: analysis       | <a href="#">#20c</a> | Definition of analysis population relating to protocol non-        | 5   |
| 5  | population and missing     |                      | adherence (eg, as randomised analysis), and any statistical        |     |
| 6  | data                       |                      | methods to handle missing data (eg, multiple imputation)           |     |
| 7  |                            |                      |                                                                    |     |
| 8  |                            |                      |                                                                    |     |
| 9  |                            |                      |                                                                    |     |
| 10 | <b>Methods: Monitoring</b> |                      |                                                                    |     |
| 11 |                            |                      |                                                                    |     |
| 12 | Data monitoring:           | <a href="#">#21a</a> | Composition of data monitoring committee (DMC); summary of         | 5   |
| 13 | formal committee           |                      | its role and reporting structure; statement of whether it is       |     |
| 14 |                            |                      | independent from the sponsor and competing interests; and          |     |
| 15 |                            |                      | reference to where further details about its charter can be found, |     |
| 16 |                            |                      | if not in the protocol. Alternatively, an explanation of why a     |     |
| 17 |                            |                      | DMC is not needed                                                  |     |
| 18 |                            |                      |                                                                    |     |
| 19 |                            |                      |                                                                    |     |
| 20 |                            |                      |                                                                    |     |
| 21 |                            |                      |                                                                    |     |
| 22 | Data monitoring:           | <a href="#">#21b</a> | Description of any interim analyses and stopping guidelines,       | 5   |
| 23 | interim analysis           |                      | including who will have access to these interim results and make   |     |
| 24 |                            |                      | the final decision to terminate the trial                          |     |
| 25 |                            |                      |                                                                    |     |
| 26 |                            |                      |                                                                    |     |
| 27 | Harms                      | <a href="#">#22</a>  | Plans for collecting, assessing, reporting, and managing solicited | 4-5 |
| 28 |                            |                      | and spontaneously reported adverse events and other unintended     |     |
| 29 |                            |                      | effects of trial interventions or trial conduct                    |     |
| 30 |                            |                      |                                                                    |     |
| 31 |                            |                      |                                                                    |     |
| 32 |                            |                      |                                                                    |     |
| 33 | Auditing                   | <a href="#">#23</a>  | Frequency and procedures for auditing trial conduct, if any, and   | 4-5 |
| 34 |                            |                      | whether the process will be independent from investigators and     |     |
| 35 |                            |                      | the sponsor                                                        |     |
| 36 |                            |                      |                                                                    |     |
| 37 |                            |                      |                                                                    |     |
| 38 | <b>Ethics and</b>          |                      |                                                                    |     |
| 39 | <b>dissemination</b>       |                      |                                                                    |     |
| 40 |                            |                      |                                                                    |     |
| 41 |                            |                      |                                                                    |     |
| 42 | Research ethics            | <a href="#">#24</a>  | Plans for seeking research ethics committee / institutional review | 7   |
| 43 | approval                   |                      | board (REC / IRB) approval                                         |     |
| 44 |                            |                      |                                                                    |     |
| 45 |                            |                      |                                                                    |     |
| 46 | Protocol amendments        | <a href="#">#25</a>  | Plans for communicating important protocol modifications (eg,      | 7   |
| 47 |                            |                      | changes to eligibility criteria, outcomes, analyses) to relevant   |     |
| 48 |                            |                      | parties (eg, investigators, REC / IRBs, trial participants, trial  |     |
| 49 |                            |                      | registries, journals, regulators)                                  |     |
| 50 |                            |                      |                                                                    |     |
| 51 |                            |                      |                                                                    |     |
| 52 |                            |                      |                                                                    |     |
| 53 | Consent or assent          | <a href="#">#26a</a> | Who will obtain informed consent or assent from potential trial    | 4   |
| 54 |                            |                      | participants or authorised surrogates, and how (see Item 32)       |     |
| 55 |                            |                      |                                                                    |     |
| 56 |                            |                      |                                                                    |     |
| 57 |                            |                      |                                                                    |     |
| 58 |                            |                      |                                                                    |     |
| 59 |                            |                      |                                                                    |     |
| 60 |                            |                      |                                                                    |     |

|    |                          |                      |                                                                      |         |
|----|--------------------------|----------------------|----------------------------------------------------------------------|---------|
| 1  | Consent or assent:       | <a href="#">#26b</a> | Additional consent provisions for collection and use of              | n/a     |
| 2  | ancillary studies        |                      | participant data and biological specimens in ancillary studies, if   |         |
| 3  |                          |                      | applicable                                                           |         |
| 4  |                          |                      |                                                                      |         |
| 5  |                          |                      |                                                                      |         |
| 6  | Confidentiality          | <a href="#">#27</a>  | How personal information about potential and enrolled                | 4-5,7   |
| 7  |                          |                      | participants will be collected, shared, and maintained in order to   |         |
| 8  |                          |                      | protect confidentiality before, during, and after the trial          |         |
| 9  |                          |                      |                                                                      |         |
| 10 |                          |                      |                                                                      |         |
| 11 | Declaration of interests | <a href="#">#28</a>  | Financial and other competing interests for principal investigators  | 8       |
| 12 |                          |                      | for the overall trial and each study site                            |         |
| 13 |                          |                      |                                                                      |         |
| 14 |                          |                      |                                                                      |         |
| 15 | Data access              | <a href="#">#29</a>  | Statement of who will have access to the final trial dataset, and    | 7       |
| 16 |                          |                      | disclosure of contractual agreements that limit such access for      |         |
| 17 |                          |                      | investigators                                                        |         |
| 18 |                          |                      |                                                                      |         |
| 19 |                          |                      |                                                                      |         |
| 20 | Ancillary and post trial | <a href="#">#30</a>  | Provisions, if any, for ancillary and post-trial care, and for       | n/a     |
| 21 | care                     |                      | compensation to those who suffer harm from trial participation       |         |
| 22 |                          |                      |                                                                      |         |
| 23 |                          |                      |                                                                      |         |
| 24 | Dissemination policy:    | <a href="#">#31a</a> | Plans for investigators and sponsor to communicate trial results     | 7       |
| 25 | trial results            |                      | to participants, healthcare professionals, the public, and other     |         |
| 26 |                          |                      | relevant groups (eg, via publication, reporting in results           |         |
| 27 |                          |                      | databases, or other data sharing arrangements), including any        |         |
| 28 |                          |                      | publication restrictions                                             |         |
| 29 |                          |                      |                                                                      |         |
| 30 |                          |                      |                                                                      |         |
| 31 |                          |                      |                                                                      |         |
| 32 |                          |                      |                                                                      |         |
| 33 | Dissemination policy:    | <a href="#">#31b</a> | Authorship eligibility guidelines and any intended use of            | 7,8     |
| 34 | authorship               |                      | professional writers                                                 |         |
| 35 |                          |                      |                                                                      |         |
| 36 |                          |                      |                                                                      |         |
| 37 | Dissemination policy:    | <a href="#">#31c</a> | Plans, if any, for granting public access to the full protocol,      | 7       |
| 38 | reproducible research    |                      | participant-level dataset, and statistical code                      |         |
| 39 |                          |                      |                                                                      |         |
| 40 |                          |                      |                                                                      |         |
| 41 | <b>Appendices</b>        |                      |                                                                      |         |
| 42 |                          |                      |                                                                      |         |
| 43 | Informed consent         | <a href="#">#32</a>  | Model consent form and other related documentation given to          | n/a     |
| 44 | materials                |                      | participants and authorised surrogates                               | (dutch) |
| 45 |                          |                      |                                                                      |         |
| 46 |                          |                      |                                                                      |         |
| 47 | Biological specimens     | <a href="#">#33</a>  | Plans for collection, laboratory evaluation, and storage of          | n/a     |
| 48 |                          |                      | biological specimens for genetic or molecular analysis in the        |         |
| 49 |                          |                      | current trial and for future use in ancillary studies, if applicable |         |
| 50 |                          |                      |                                                                      |         |
| 51 |                          |                      |                                                                      |         |
| 52 |                          |                      |                                                                      |         |
| 53 |                          |                      |                                                                      |         |
| 54 |                          |                      |                                                                      |         |
| 55 |                          |                      |                                                                      |         |
| 56 |                          |                      |                                                                      |         |
| 57 |                          |                      |                                                                      |         |
| 58 |                          |                      |                                                                      |         |
| 59 |                          |                      |                                                                      |         |
| 60 |                          |                      |                                                                      |         |

# BMJ Open

## Parkinson's disease, temporomandibular disorder pain, and bruxism and its clinical consequences. A protocol of a clinical observational study

|                                 |                                                                                                                                                                                                                                                                                                     |
|---------------------------------|-----------------------------------------------------------------------------------------------------------------------------------------------------------------------------------------------------------------------------------------------------------------------------------------------------|
| Journal:                        | <i>BMJ Open</i>                                                                                                                                                                                                                                                                                     |
| Manuscript ID                   | bmjopen-2021-052329.R1                                                                                                                                                                                                                                                                              |
| Article Type:                   | Protocol                                                                                                                                                                                                                                                                                            |
| Date Submitted by the Author:   | 16-Dec-2021                                                                                                                                                                                                                                                                                         |
| Complete List of Authors:       | Verhoeff, Merel; ACTA, Orofacial Pain and Dysfunction<br>Koutris, Michail; ACTA, Orofacial Pain and Dysfunction<br>Berendse, Henk; Amsterdam University Medical Centres<br>Dijk van, Karin; Epilepsy Netherlands Foundation Sleep-Wake Centre<br>Lobbezoo, F.; ACTA, Orofacial Pain and Dysfunction |
| <b>Primary Subject Heading</b>: | Dentistry and oral medicine                                                                                                                                                                                                                                                                         |
| Secondary Subject Heading:      | Dentistry and oral medicine, Neurology, Geriatric medicine                                                                                                                                                                                                                                          |
| Keywords:                       | Parkinson-s disease < NEUROLOGY, EPIDEMIOLOGY, Motor neurone disease < NEUROLOGY, ORAL MEDICINE                                                                                                                                                                                                     |
|                                 |                                                                                                                                                                                                                                                                                                     |

SCHOLARONE™  
Manuscripts



# Parkinson's disease, temporomandibular disorder pain, and bruxism and its clinical consequences. A protocol of a clinical observational study

M.C. Verhoeff, DDS, MSc<sup>1</sup> – M.C.Verhoeff@acta.nl  
M. Koutris, DDS, PhD<sup>1</sup> – M.Koutris@acta.nl  
H.W. Berendse, MD, PhD<sup>2</sup> – H.Berendse@amsterdamumc.nl  
K.D. van Dijk, MD, PhD<sup>2,3</sup> – [Kvdijk@sein.nl](mailto:Kvdijk@sein.nl)  
F. Lobbezoo, DDS, PhD<sup>1</sup> – F.Lobbezoo@acta.nl

<sup>1</sup>Department Orofacial Pain and Dysfunction, Academic Centre for Dentistry Amsterdam (ACTA), University of Amsterdam and Vrije Universiteit Amsterdam, Gustav Mahlerlaan 3004, 1081 LA Amsterdam, The Netherlands

<sup>2</sup>Amsterdam University Medical Centres, Vrije Universiteit Amsterdam, Neurology, Amsterdam Neuroscience, De Boelelaan 1117, 1081 HV Amsterdam, The Netherlands

<sup>3</sup>Sleep Wake Centre, Stichting Epilepsie Instellingen Nederland (SEIN), Achterweg 2, 2103 SW Heemstede, The Netherlands

## Corresponding author:

M.C. Verhoeff  
Gustav Mahlerlaan 3004  
1081 LA Amsterdam  
M.C.Verhoeff@acta.nl

## Abstract

**Introduction:** A recent questionnaire-based study suggested that bruxism and painful temporomandibular disorders (TMD pain) may be more prevalent in Parkinson's disease (PD) patients compared to controls. The presence of both bruxism and TMD pain may negatively influence patients' quality of life. The present study is designed to clinically and more objectively investigate the presence of bruxism and TMD pain in PD patients. The secondary aim of the study is to identify factors associated with bruxism and TMD pain in PD patients, such as disease severity and dopaminergic medication usage. Furthermore, the presence of tooth wear in PD patients will be studied as this can be a major consequence of bruxism. Finally, deviations in saliva composition that may contribute to tooth wear will be studied.

**Methods and analysis:** This is a single-centre observational clinical study at the Amsterdam University Medical Centres, location VUmc. All patients with a clinical diagnosis of PD will be eligible for inclusion. Participants will fill in a set of questionnaires. Subsequently, patients will be examined clinically for, amongst others, TMD pain, presence and severity of tooth wear, and deviations in saliva composition. Sleep-time registrations will take place for 5 nights with the GrindCare<sup>®</sup> GC4 (i.e., a portable, single-channel electromyographic recorder) to assess sleep bruxism and simultaneously by the use of the BruxApp for 5 days to assess awake bruxism. We will partly use data collected during standard clinical care, to minimize patient burden.

**Ethics and dissemination:** The scientific and ethical aspects of this study protocol have been approved by the Medical Ethics Review Committee of the Amsterdam UMC, location VUmc; NL. 2019.143). Informed consent will be obtained from all participants. The results will be published in a peer-reviewed journal, if relevant presented at conferences, and published as part of a Ph.D. thesis.

**Trial registration:** NL8307

**Keywords:** Parkinson's Disease; Temporomandibular Disorders; Bruxism; Tooth wear; Saliva; Protocol

## Strengths and limitations of this study:

- This clinical study will provide accurate data on the presence of painful temporomandibular disorders and bruxism in Parkinson patients attending the outpatient clinic for movement disorders of Amsterdam UMC, location VUmc, and their possible associated factors like disease severity and medication usage.

- 1  
2  
3 51 - Novel information about tooth wear and saliva composition and quantity in patients with Parkinson's  
4 52 disease will be collected.  
5 53 - Since polysomnographic recordings for the assessment of definite sleep bruxism are not feasible in this  
6 54 study, a portable, single-channel electromyographic recorder is used instead.  
7 55 - Electromyographic recordings will be performed for several nights in a row, thus taking into account the  
8 56 fluctuating nature of sleep bruxism.  
9 57 - Because of the design of this study, no causal relationships can be established between the outcome  
10 58 variables and predictors.  
11  
12  
13 59

## 60 Introduction

61 Parkinson's disease (PD) is a neurodegenerative movement disorder characterized by motor symptoms, in  
62 particular rigidity, bradykinesia, and tremor<sup>1,2</sup>. Patients with PD do not solely experience motor symptoms, but  
63 also non-motor symptoms like pain, anxiety, depression, sleep problems, and cognitive dysfunction<sup>3,4</sup>.

64  
65 Due to global ageing, the prevalence of PD is estimated to increase significantly in the near future. Ageing is  
66 associated with oral health-related issues, which may therefore occur more frequently in the near future as  
67 well<sup>5</sup>. Dentists regularly see patients with bruxism in the dental office, which is an oral health-related issue  
68 that is not necessarily associated with systemic diseases. Bruxism is currently defined as "a repetitive jaw-  
69 muscle activity characterized by clenching or grinding of the teeth and/or by bracing or thrusting of the  
70 mandible"<sup>6</sup>. It can occur during sleep, indicated as sleep bruxism, or during wakefulness, indicated as awake  
71 bruxism<sup>6</sup>. Not only bruxism itself, but also its possible consequences, such as mechanical tooth wear and  
72 temporomandibular disorders (TMD), have hardly been studied in patients with PD. TMD is a collective term  
73 embracing disorders of the temporomandibular joint, masticatory muscles, and adjacent anatomical  
74 structures<sup>7</sup>. TMD can present as painful and non-painful conditions. Patients with TMD can report, for  
75 example, orofacial pain (including headache), limitations in the movement of the mandible, and joint noises<sup>7</sup>.  
76 Both tooth wear and TMD may affect the oral health-related quality of life<sup>8</sup>.

77  
78 In a population with PD patients, oral health was recently studied<sup>9</sup>. It was shown that the oral health in PD  
79 patients is deteriorated as compared to their peers without PD. Besides, medication usage can influence  
80 salivation production, which in turn influences the oral environment<sup>10</sup>. Also, gastrointestinal problems are  
81 more frequently shown in patients with PD. In turn, this could influence the presence of tooth wear due to  
82 reflux<sup>11,12</sup>.

83  
84 While oral health care in PD has not been studied widely<sup>9</sup>, oral (dys-)function in PD has been studied even less,  
85 even though PD, bruxism, and TMD have been suggested to share several common characteristics (see Figure  
86 1). Similar to PD, bruxism is a condition that is considered to be regulated centrally and not peripherally<sup>13</sup>. In  
87 addition, in the pathophysiology of both PD and bruxism, the brain dopamine system plays an important role  
88 <sup>14-16</sup>. Besides, sleep disturbances<sup>17</sup> that are present both in PD<sup>18</sup> and in sleep bruxism, are associated with  
89 arousal activity<sup>17,18</sup>. As a result of such arousal activity, sleep bruxism may occur more frequently in people  
90 with sleep disturbances than in those without<sup>19</sup>. Also, in the prodromal phase of PD, a higher rhythmic

1  
2  
3 91 masticatory muscle activity (RMMA) on polysomnography in NREM sleep has been observed, compared to  
4 92 controls<sup>20</sup>. This is a characteristic that is also seen in sleep bruxism patients<sup>21</sup>. Furthermore, bruxism may be  
5 93 considered as a risk factor for TMD, depending on the assessment methods used<sup>22</sup>. TMD itself shares some  
6 94 characteristics with PD. For example, musculoskeletal pain (of which TMD pain is a subtype) is frequently  
7 95 reported by patients with PD<sup>3,23</sup>. Finally, suggestions have been put forward that alterations in the  
8 96 dopaminergic system are also present in patients with pain in the orofacial region<sup>24</sup>, although this remains to  
9 97 be confirmed in patients with TMD pain.  
10  
11  
12  
13  
14 98

15 99 Recently, a questionnaire-based pilot study in 368 patients with PD and 340 controls suggested a higher  
16 100 prevalence of bruxism and TMD pain in patients with PD<sup>25</sup>. Also, PD patients reported a higher mean TMD-pain  
17 101 intensity than controls<sup>25</sup>. However, since this was a questionnaire-based study, extrapolation of these findings  
18 102 requires further verification through clinical and instrumental data. Hence, to overcome some of the  
19 103 limitations of the previous pilot study, the present protocol was designed. The planned study will acquire more  
20 104 objective clinical and instrumental measures for awake and sleep bruxism and TMD pain, which can give more  
21 105 valid information on outcomes like the presence of bruxism in this population. Also, additional factors, such as  
22 106 the severity of PD and cognitive function, will be included as possible predictors for bruxism and/or TMD pain  
23 107 in PD patients. Knowledge of the factors that can influence bruxism and/or TMD pain in patients with PD will  
24 108 help dentists and other oral health care providers to provide individualised care to prevent and/or alleviate  
25 109 symptoms of bruxism and/or TMD pain and their consequences in this vulnerable group of patients.  
26  
27  
28  
29  
30  
31  
32  
33

34 111 Based on the above-summarized evidence, the primary aim of this study is to investigate the presence of  
35 112 bruxism and TMD pain in PD patients, through objective clinical and instrumental measurements. Based on our  
36 113 pilot-study outcomes<sup>25</sup>, we hypothesise that the prevalence of bruxism and TMD pain in the current  
37 114 population will be higher than in their peers without PD, as described in the literature<sup>26,27</sup>.  
38  
39  
40  
41

42 116 In addition, the secondary aims and their corresponding hypotheses are the following:

- 43 117 1. To identify which factors are associated with bruxism and TMD pain in PD patients. We hypothesise that  
44 118 factors like medication usage<sup>14</sup>, disease severity<sup>13,15</sup>, psychosocial factors<sup>28-30</sup>, and lifestyle factors<sup>28,29,31</sup>  
45 119 are influencing the studied associations.
- 46 120 2. To investigate whether the salivary flow, the pH, and the buffer capacity of saliva in patients with PD are  
47 121 related to the severity of tooth wear. Our hypothesis is that in patients with PD, the saliva composition  
48 122 and salivary flow deviate from normal standards and that this is associated with the severity of tooth  
49 123 wear<sup>12</sup>.
- 50 124 3. To investigate with Dopamine Transporter Single Photon Emission Computed Tomography (DAT-SPECT)  
51 125 whether there is a relationship between the degree of presynaptic dopaminergic loss and the presence of  
52 126 bruxism in these patients. The hypothesis is that there is a difference in striatal dopaminergic deficit  
53 127 between PD patients with and without bruxism, in which patients without bruxism show a smaller deficit.  
54  
55  
56  
57  
58  
59  
60 128

## 129 **Methods and analysis**

130 The design of this study is a single-centre observational clinical study that will take place at the Department of  
131 Neurology of the Amsterdam University Medical Centres (Amsterdam UMC), location VUmc. The data  
132 collection will take place for two years.

133

### 134 **Participants and eligibility**

135 Patients already clinically diagnosed with PD or planned for an intake appointment with presumable PD at the  
136 outpatient clinic for movement disorders of the VUmc, will be eligible to participate in the study. Yearly, about  
137 100-120 new consultations for PD are seen in the outpatient clinic. In addition, patients already receiving  
138 treatment at the VUmc are eligible for participation as well. The inclusion and exclusion criteria are listed in  
139 Table 1.

140

### 141 **Study procedure**

142 In Figure 2, the study procedure is visualized. If patients agree to participate in the study, they will be asked to  
143 sign an informed consent. This study will be performed in parallel to the routine clinical care (see Table 2) at  
144 the Amsterdam UMC, location VUmc. When questionnaires/screenings were filled in  $\geq 1$  year ago, participants  
145 will be asked to repeat this. Specifically, for this study, additional information will be obtained in the form of a  
146 set of questionnaires that participants can fill in at home and a clinical examination at the hospital (see Table  
147 3). The neurologist will determine whether additional brain imaging (viz., MRI or DAT-SPECT) is necessary,  
148 mainly in cases of clinical doubt. The estimated percentage of additional brain imaging in newly referred  
149 patients is 40%.

150

### 151 **Main study parameters**

152 The main study parameters or endpoints are “presence of bruxism (sleep and/or awake)” as well as “diagnosis  
153 of TMD pain”. For the assessment of sleep bruxism, patients will be asked to sleep 5 complete registration  
154 nights with a portable, single-channel electromyographic recorder, viz., the GrindCare® GC4 (Sunstar Suisse SA,  
155 Etoy, Switzerland)<sup>32</sup>. For the assessment of awake bruxism, patients will use, for 5 complete registration days,  
156 the BruxApp<sup>33</sup>, which is a mobile application for the recording of bruxism activity based on ecological  
157 momentary assessment<sup>6</sup>. According to international consensus, a classification of the probability that bruxism  
158 is present can be made as follows: possible, probable, and definite bruxism presence<sup>6</sup>. In this research, all  
159 probabilities of bruxism presence can be determined, however, the highest probability will be used (viz., both  
160 probable and definite). When patients cannot use the GrindCare® GC4 and/or BruxApp, and more certainty  
161 towards a definite presence is thus impossible, probable bruxism presence will be determined with the use of  
162 data from the clinical examination, based on the presence of positive symptoms of bruxism (viz., clenching  
163 marks in the soft tissues of the cheek, tongue, or lip, mechanical tooth wear (attrition), and/or hypertrophy of  
164 the masseter muscle)<sup>6</sup>.

1  
2  
3 165 The TMD-pain diagnosis will be established according to the Diagnostic Criteria for TMD (DC/TMD)<sup>34</sup>, with the  
4 166 use of standardized questionnaires and clinical examination procedures. Based on the collected data, the  
5 167 following diagnoses can be set: myalgia (local myalgia, myofascial pain, myofascial pain with referral),  
6 168 arthralgia, headache attributed to TMD, and non-painful joint disorders (disc displacement with reduction, disc  
7 169 displacement with reduction with intermitted locking, disc displacement without reduction with limited mouth  
8 170 opening, disc displacement without reduction without limited mouth opening, degenerative joint disease,  
9 171 subluxation). The main focus of this research protocol will be the TMD-pain diagnosis, for the establishment of  
10 172 which the diagnostic flow chart of the DC/TMD will be used<sup>34</sup>.

### 16 173 **Secondary study parameters**

17 174 To identify which factors are associated with bruxism and TMD pain in PD patients, several variables will be  
18 175 evaluated (see Tables 2 and 3), using different clinical/instrumental measures (see appendix 1). Most of these  
19 176 variables have already been reported as possible risk factors for bruxism<sup>29</sup> and/or TMD<sup>35</sup> in the general  
20 177 population<sup>28-30</sup>. However, the variables dopaminergic medication usage and disease stage/severity of PD have  
21 178 not been studied yet in the association with bruxism or TMD pain in PD patients. Finally, if DAT-SPECT imaging  
22 179 is available, we will compare the measured presynaptic striatal dopaminergic deficit between participants with  
23 180 and without bruxism<sup>36</sup>.

### 28 181 29 182 **Sample size**

30 183 According the pilot study, the prevalence of awake bruxism, sleep bruxism, and TMD pain in patients with PD is  
31 184 46%, 24%, and 29.5%, respectively<sup>21</sup>. Taking the cautious approach, we calculated the sample size for all  
32 185 conditions and chose the largest sample size. Aiming for a precision of 5% with a level of confidence of 95%,  
33 186 382 participants are needed<sup>37</sup>. See appendix 2 for the sample size calculation. Furthermore, the approach to  
34 187 calculate the sample size for the most important secondary aim (viz., to identify which factors are associated  
35 188 with bruxism and TMD pain in PD patients) is also shown in appendix 2. The numbers are obtained when  
36 189 reaching the sample size for the primary aim.

### 42 190 43 191 **Statistical approach**

44 192 With the use of descriptive tests, demographic data will be summarised. In Figure 3, it is shown how the  
45 193 dataset is analysed to give an answer on which factor is associated with the presence/absence of probable  
46 194 bruxism/TMD pain or with the frequency (i.e., the number of bruxism events per hour) of definite bruxism. The  
47 195 forward selection procedure will be used for the (strongest) independent variables (see Table 4) until all  
48 196 variables in this regression model show a P-value <0.05 (See Step 2, Figure 3). Finally, to analyse if there is an  
49 197 association between tooth wear and composition of saliva, Spearman's correlation coefficient will be used. For  
50 198 the DAT-SPECT, a semi-quantitative analysis will be used. Ratios for specific versus non-specific binding will be  
51 199 calculated for the regions of interest (viz., left and right putamen and caudate nucleus, using the occipital  
52 200 cortex as a reference area) and analysed using the independent sample t-test<sup>36,38</sup>.

53 201  
54  
55  
56  
57  
58  
59  
60

## 202 Patient and public involvement

203 Neither patients nor the community were involved in the design or performance of this study. However,  
204 feedback from participants of the earlier pilot study<sup>21</sup> was used to design this study. The burden for the  
205 participants will be kept as minimal as possible. On request, the outcomes of this study will be disseminated to  
206 the participants.

## 207 Discussion

208 The primary aim of this study is to objectively measure the presence of bruxism and TMD pain in a population  
209 of patients with Parkinson's Disease (PD). Furthermore, the three secondary aims are described as follows: (i)  
210 to identify which factors are associated with bruxism and TMD pain in PD patients, (ii) to investigate whether  
211 the salivary flow, the pH, and the buffer capacity of saliva in patients with PD are related to the severity of  
212 tooth wear, and finally (iii) to investigate with DAT-SPECT whether there is a relationship between the degree  
213 of presynaptic dopaminergic loss and the presence of bruxism in these patients.

214  
215 To the best of our knowledge, this is the first study that attempts to objectively measure the presence of  
216 awake bruxism, sleep bruxism, and TMD pain in a population of patients with PD. Previous studies investigated  
217 the prevalence of awake bruxism in this population, however only few participants were included or only  
218 questionnaires were used<sup>21,39</sup>. When quantifying bruxism with continuous data, recent insights showed a  
219 better quality of a definite bruxism diagnosis<sup>6</sup>. Nevertheless, we used a dichotomous outcome in this protocol  
220 study to answer our first aim, i.e., to investigate the presence of bruxism. Besides, we also included self-report  
221 and a clinical data, which do not yield continuous outcomes. Despite this, in the present study, the use of the  
222 GrindCare<sup>®</sup> GC4 and the BruxApp can give more certainty towards a definite establishment of sleep and awake  
223 bruxism, respectively<sup>6</sup>. In addition, the clinical examination according to the DC/TMD<sup>34</sup> enables setting a valid  
224 TMD-pain diagnosis, making a distinction between several TMD complaints, and comparing the outcomes with  
225 other (inter-) national research.

226  
227 Because PD patients are vulnerable and burdened with frequent visits to multiple caregivers (e.g., their  
228 neurologist, physiotherapist, and speech therapist), it is important to burden the participants as minimally as  
229 possible. Therefore, during the process of designing this study and collecting the data, a multidisciplinary  
230 approach was established between neurologists and dentists to enable an as efficient as possible usage of the  
231 patient's time and energy.

232  
233 The targeted number of inclusions will be a challenge. However, the calculated sample size is an estimation,  
234 because no clinical prevalences are known as yet. Like in otherwise healthy individuals, clenching and grinding  
235 are not always recognized by the patients themselves<sup>40,41</sup>, thus the prevalence of sleep bruxism in the pilot  
236 study could have been underestimated. This means that the calculated sample size in this study might be  
237 higher than eventually required. Therefore, an interim analysis will be performed after 130 included  
238 participants or 6 months.



1  
2  
3 239  
4  
5 240 This study has no longitudinal character and therefore, no causal relations can be observed between the (in-  
6 241 dependent variables. Also, polysomnography is the golden standard to detect sleep bruxism while in the  
7  
8 242 present study, a portable electromyographic recorder will be used<sup>6</sup>. However, since this device will be used for  
9  
10 243 several nights in a row, the fluctuating character of sleep bruxism can be taken into account and is therefore  
11 244 considered a good proxy for definite sleep bruxism<sup>32</sup>. It should be noted, however, that the portable recorder  
12 245 will fail to enable a distinction between jaw-muscle activities related to sleep bruxism and those related to  
13  
14 246 other orofacial movement disorders like oral dyskinesia and oro-mandibular dystonia<sup>42</sup>. This is an important  
15 247 issue, because such movement disorders can be present in patients with PD related to their medication usage.  
16  
17 248 Fortunately, in the questionnaire and clinical examination of the MDS-UPDRS<sup>43</sup> (Table 2), the presence of oral  
18 249 dyskinesia and oro-mandibular dystonia is included. Hence, it is possible to correct for their presence in the  
19  
20 250 data analysis.

21 251  
22  
23 252 In conclusion, this study will give more detailed information about the presence of bruxism and TMD pain in  
24 253 patients with PD, as well as about possible associated factors like medication usage and severity of the disease.  
25  
26 254 Finally, more clinically relevant information will become available for dentists and other oral health care  
27  
28 255 professionals about the amount of tooth wear and the composition of saliva in patients with PD.

### 29 30 256 **Ethics and dissemination:**

31  
32 257 This study protocol has been approved by the Medical Ethics Review Committee of Amsterdam UMC, location  
33 258 VUmc; NL. 2019.143). Informed consent will be obtained from all participants. A data monitor will meet  
34  
35 259 annually to primarily concentrate on the safety of patients, and will be monitoring the collected data and  
36  
37 260 informed consents.

38 261  
39 262 Due to the sensitive nature of personal information, all data will be blinded and stored in secure  
40  
41 263 environments. Only the executive researcher and the head of the department can reach the unblinded  
42  
43 264 informed consents and the key for unblinding. These are stored separately. Digital data will be stored  
44 265 pseudonymized in a secure database using Castor EDC (CDISC, Amsterdam, Netherlands). Detailed methods for  
45  
46 266 data management and storage can be obtained by contacting the corresponding author.

### 47 48 267 **Authors contribution**

49  
50 268 All authors (MV, MK, KvD, HB and FL) were involved in designing this study. MV obtained the approval of the  
51  
52 269 Medical Ethics Review Committee and drafted the manuscript. Finally, all authors (MV, MK, KvD, HB and FL)  
53  
54 270 gave feedback on the draft and approved the final manuscript.

### 55 271 **Funding statement:**

56  
57 272 This work was partly supported by the foundation for Oral Health and Parkinson's Disease (Stichting Mondzorg  
58  
59 273 & Parkinson), the Dutch association for scientific dentistry (Nederlandse Wetenschappelijke Vereniging voor

1  
2  
3 274 Tandheelkunde (NWVT)), and the Dutch association for Orofacial Pain, Dysfunction and Prosthetic Dentistry  
4 275 (Nederlandse Vereniging voor Gnathologie en Prothetische Tandheelkunde (NVGPT)).  
5  
6

7 276 **Competing interest**

8  
9 277 Dr. Lobbezoo reports grants and other from Sunstar Suisse SA, grants from Somnomed-Goedegebuure, grants  
10 278 from Airway Management, grants from Vivisol, grants from Health Holland, outside the submitted work.  
11  
12  
13  
14  
15  
16  
17  
18  
19  
20  
21  
22  
23  
24  
25  
26  
27  
28  
29  
30  
31  
32  
33  
34  
35  
36  
37  
38  
39  
40  
41  
42  
43  
44  
45  
46  
47  
48  
49  
50  
51  
52  
53  
54  
55  
56  
57  
58  
59  
60

For peer review only



## 279 Tables

280 *Table 1. Inclusion and Exclusion criteria. When patients have a pacemaker, they cannot use the GrindCare® GC4 (i.e., a*  
 281 *portable, single-channel electromyographic recorder to detect sleep bruxism) and will be excluded from that specific part of*  
 282 *the study. When patients do not have a smartphone, participants cannot use the BruxApp (i.e., an application on a*  
 283 *smartphone to assess awake bruxism) and will be excluded from that specific part of the study.*

| Inclusion criteria                                                | Exclusion criteria                                              |
|-------------------------------------------------------------------|-----------------------------------------------------------------|
| 1. ≥18 years of age                                               | 1. atypical parkinsonian syndromes                              |
| 2. > 21 on the Montreal Cognitive Assessment (MoCA) <sup>44</sup> | 2. for using the GrindCare: pacemaker                           |
| 3. fulfil clinical diagnostic criteria for PD <sup>45</sup>       | 3. for using the BruxApp: no smartphone                         |
|                                                                   | 4. for the DAT-SPECT: no deep brain stimulation implant present |

284

285 *Table 2. Questionnaires and clinical data collected as part of the regular care at the hospital, which is used in this*  
 286 *observational study. See Appendix 1 for a description per questionnaire/instrument.*

| Variables standard care hospital                                                                                                                                                                                                                                                                                                                                                                                                                      |
|-------------------------------------------------------------------------------------------------------------------------------------------------------------------------------------------------------------------------------------------------------------------------------------------------------------------------------------------------------------------------------------------------------------------------------------------------------|
| 1. Cognitive function (Montreal Cognitive Assessment, MoCA) <sup>44</sup> ; (Parkinson's Disease Cognitive Functional Rating Scale, PD-CFRS) <sup>46</sup>                                                                                                                                                                                                                                                                                            |
| 2. Disease stage (Hoehn & Yahr) <sup>47</sup> ; Disease severity (Unified Parkinson's Disease Rating Scale – III, UPDRS-III) <sup>43</sup>                                                                                                                                                                                                                                                                                                            |
| 3. Dopaminergic medication (Levodopa equivalent daily dose, LEDD) <sup>48</sup>                                                                                                                                                                                                                                                                                                                                                                       |
| 4. Neuropsychiatric symptoms: Depression (Beck Depression Inventory-ii, BDI-ii) <sup>49</sup> ; Apathy (Apathy evaluation scale, AES) <sup>50</sup> ; Anxiety (Parkinson Anxiety Scale, PAS) <sup>51</sup> ; Psychotic (Parkinson's Disease-adapted scale for assessment of positive symptoms, SAPS-PD) <sup>52</sup> ; Impulse control (Questionnaire for Impulsive-Compulsive Disorders in Parkinson's Disease-Rating Scale, QUIP-RS) <sup>53</sup> |
| 5. Presynaptic dopaminergic loss, when applicable (brain imaging) (Dopamine Transporter Single Photon Emission Computed Tomography, DAT-SPECT) <sup>36,38</sup>                                                                                                                                                                                                                                                                                       |
| 6. Quality of sleep (Scales for Outcomes PD Sleep, SCOPA-SLEEP) <sup>54</sup>                                                                                                                                                                                                                                                                                                                                                                         |
| 7. Stimulants usage: Alcohol (per unit, daily), Drugs (per unit, daily), Smoking (per unit, daily)                                                                                                                                                                                                                                                                                                                                                    |

287

288 *Table 3. Additional research components, i.e., performed in addition to the regular appointments at the hospital. See*  
 289 *Appendix 1 for a description per questionnaire/instrument.*

| Additional research components |                                                                                                                                                                                                           |
|--------------------------------|-----------------------------------------------------------------------------------------------------------------------------------------------------------------------------------------------------------|
| Questionnaires                 | 1. Reflux (GerdQ-NL) <sup>55</sup>                                                                                                                                                                        |
|                                | 2. TMD pain (according to the Diagnostic Criteria for TMD, DC/TMD) <sup>34</sup> and intensity (graded chronic pain scale, GCPS) <sup>56</sup>                                                            |
|                                | 3. Tooth wear                                                                                                                                                                                             |
|                                | 4. Sleep (Obstructive Sleep Apnea, STOP-Bang NL) <sup>57</sup>                                                                                                                                            |
| Clinical examination           | 1. Intra-oral examination (positive symptoms of bruxism (viz., clenching marks in the soft tissues of the cheek, tongue or lip, mechanical tooth wear, hypertrophy of the masseter muscle)) <sup>34</sup> |
|                                | 2. Quantitative tooth wear screening (part of the Tooth Wear Evaluation System, TWES) <sup>58</sup>                                                                                                       |
|                                | 3. A brief screening of the dental prosthesis (when applicable)                                                                                                                                           |
|                                | 4. Dry mouth screening (Clinical Oral Dryness Score, CODS) <sup>59</sup>                                                                                                                                  |

|                     |                                                                                         |
|---------------------|-----------------------------------------------------------------------------------------|
|                     | 5. Jaw-mobility examination (DC/TMD) <sup>34</sup>                                      |
|                     | 6. Joint noises examination (DC/TMD) <sup>34</sup>                                      |
|                     | 7. Palpation of masticatory muscles and temporomandibular joints (DC/TMD) <sup>34</sup> |
|                     | 8. Dynamic/static tests <sup>60</sup>                                                   |
|                     | 9. Bruxoprovoctiontest <sup>61</sup>                                                    |
|                     | 10. Saliva test (Saliva-Check Buffer <sup>®</sup> ) <sup>62</sup>                       |
| <b>Registration</b> | 1. BruxApp <sup>61</sup>                                                                |
|                     | 2. GrindCare <sup>®</sup> GC4 <sup>32,63</sup>                                          |

290

291 *Table 4. The independent variables (categorized) that will be investigated for one of the secondary aims: which factors are*  
 292 *associated with the presence of bruxism and TMD pain in patients with Parkinson's Disease?*

| <b>Independent variables (categorized)</b> |                                                                                                                  |
|--------------------------------------------|------------------------------------------------------------------------------------------------------------------|
| 1.                                         | Bruxism ( <i>when analysing which factors are associated with the presence of TMD pain in patients with PD</i> ) |
| 2.                                         | Neuropsychiatric symptoms (depression, anxiety, apathy, psychosis, impulse disorders)                            |
| 3.                                         | Parkinson's Disease (disease stage, disease severity, medication usage, cognitive function)                      |
| 4.                                         | Sleep (quality of sleep, obstructive sleep apnea)                                                                |
| 5.                                         | Stimulants usage (alcohol, smoking, drugs)                                                                       |
| 6.                                         | TMD pain ( <i>when analysing which factors are associated with the presence of bruxism in patients with PD</i> ) |
| 7.                                         | Tooth Wear related (reflux, saliva, dry mouth)                                                                   |

293

## References

1. Kalia L V, Lang AE, Shulman G. Parkinson's disease. *Lancet* 2015; 386(9996): 896-912
2. Opara JA, Matecki A, Małecka E, Socha T. Motor assessment in parkinson's disease. *Ann Agric Environ Med* 2017; 24(3): 411-415
3. Khoo TK, Yarnall AJ, Duncan GW, et al. The spectrum of nonmotor symptoms in early Parkinson disease. *Neurology* 2013; 80(3): 276-281
4. Chaudhuri KR, Healy DG, Schapira AH V. Non-motor symptoms of Parkinson's disease: diagnosis and management. *Lancet Neurol* 2006; 5(3): 235-45.
5. Ettinger RL. Oral health and the aging population. *J Am Dent Assoc* 2007; 138(suppl): 5S-6S
6. Lobbezoo F, Ahlberg J, Raphael KG, et al. International consensus on the assessment of bruxism: Report of a work in progress. *J Oral Rehabil* 2018; 45(11): 837-844
7. Leeuw R de, Klasser GD. *Orofacial Pain: Guidelines for Assessment, Diagnosis, and Management. 5th edition.* Chicago: Quintessence Publishing Co; 2013
8. Papagianni CE, van der Meulen MJ, Naeije M, Lobbezoo F. Oral health-related quality of life in patients with tooth wear. *J Oral Rehabil* 2013; 40(3): 185-90
9. Stiphout MAE van, Marinus J, Hilten JJ Van, Lobbezoo F, Baat C De. Oral Health of Parkinson's Disease Patients: A Case-Control Study. *Parkinson Dis* 2018; e9315285
10. Villa A, Wolff A, Narayana N, et al. World Workshop on Oral Medicine VI: a systematic review of medication-induced salivary gland dysfunction. *Oral Dis* 2016; 22(5): 365-82
11. Maeda T, Nagata K, Satoh Y, Yamazaki T, Takano D. High prevalence of gastroesophageal reflux disease in Parkinson's disease: A questionnaire-based study. *Parkinsons Dis* 2013; e742128
12. Wetselaar P, Manfredini D, Ahlberg J, et al. Associations between tooth wear and dental sleep disorders: A narrative overview. *J Oral Rehabil* 2019;
13. Lobbezoo F, Naeije M. Bruxism is mainly regulated centrally, not peripherally. *J Oral Rehabil* 2001; 28(12): 1085-1091
14. Lobbezoo F, Lavigne GJ, Tanguay R, Montplaisir JY. The effect of the catecholamine precursor L-dopa on sleep bruxism: A controlled clinical trial. *Mov Disord* 1997; 12(1): 73-78
15. Lobbezoo F, Soucy J, Montplaisir JY, Lavigne GJ. Striatal D2 Receptor Binding in Sleep Bruxism : A Controlled Study with Iodine-123-Iodobenzamide and Single-photon-emission Computed Tomography. *J Dent Res* 1996; 75(10): 1804-10
16. Lobbezoo F, Soucy JP, Hartman NG, Montplaisir JY, Lavigne GJ. Effects of the D2 receptor agonist bromocriptine on sleep bruxism: report of two single-patient clinical trials. *J Dent Res* 1997; 76(9): 1610-1614
17. Albers JA, Chand P, Anch AM. Multifactorial sleep disturbance in Parkinson's disease. *Sleep Med* 2017; 35: 41-48
18. Menza M, Dobkin RD, Marin H, Bienfait K. Sleep disturbances in Parkinson's disease. *Mov Disord* 2010; 25(suppl 1): S117-22
19. Kato T, Montplaisir JY, Guitard F, Sessle BJ, Lund JP, Lavigne GJ. Evidence that experimentally induced sleep bruxism is a consequence of transient arousal. *J Dent Res* 2003; 82(4): 284-8
20. Abe S, Gagnon JF, Montplaisir JY, et al. Sleep bruxism and oromandibular myoclonus in rapid eye movement sleep behavior disorder: A preliminary report. *Sleep Med* 2013; 14(10): 1024-1030
21. Lavigne GJ, Rompré PH, Poirier G, Huard H, Kato T, Montplaisir JY. Rhythmic masticatory muscle activity during sleep in humans. *J Dent Res* 2001; 80(2): 443-8
22. Manfredini D, Lobbezoo F. Relationship between bruxism and temporomandibular disorders: a systematic review of literature from 1998 to 2008. *Oral Surg Oral Med Oral Pathol Oral Radiol Endod.* 2010;109(6):e26-e50

23. Tai Y-C, Lin C-H. An overview of pain in Parkinson's disease. *Clin Park Relat Disord* 2020; 2: 1-8
24. Hagelberg N, Forssell H, Aalto S, et al. Altered dopamine D2 receptor binding in atypical facial pain. *Pain* 2003; 106(1-2): 43-48
25. Verhoeff MC, Lobbezoo F, Wetselaar P, Aarab G, Koutris M. Parkinson's disease, temporomandibular disorders and bruxism: A pilot study. *J Oral Rehabil* 2018; 45(11): 854-863
26. Wetselaar P, Vermaire EJH, Lobbezoo F, Schuller AA. The prevalence of awake bruxism and sleep bruxism in the Dutch adult population. *J Oral Rehabil* 2019; 46(7): 617-623
27. Visscher CM, Ligthart L, Schuller AA, et al. Comorbid Disorders and Sociodemographic Variables in Temporomandibular Pain in the General Dutch Population. *J Oral Facial Pain Headache* 2015; 29(1): 51-9
28. Van Selms MKA, Visscher CM, Naeije M, Lobbezoo F. Bruxism and associated factors among Dutch adolescents. *Community Dent Oral Epidemiol* 2013; 41(4): 353-363
29. Manfredini D, Lobbezoo F. Role of psychosocial factors in the etiology of bruxism. *J Orofac Pain* 2009; 23(2): 153-66
30. Winocur E, Uziel N, Lisha T, Goldsmith C, Eli I. Self-reported Bruxism associations with perceived stress, motivation for control, dental anxiety and gagging. *J Oral Rehabil* 2011; 38(1): 3-11
31. Castroflorio T, Bargellini A, Rossini G, Cugliari G, Deregibus A. Sleep bruxism and related risk factors in adults: A systematic literature review. *Arch Oral Biol* 2017; 83:25-32
32. Yachida W, Arima T, Castrillon EE, Baad-Hansen L, Ohata N, Svensson P. Diagnostic validity of self-reported measures of sleep bruxism using an ambulatory single-channel EMG device. *J Prosthodont Res* 2016; 60(4): 250-257
33. Manfredini D, Winocur E, Guarda-Nardini L, Paesani D, Lobbezoo F. Epidemiology of Bruxism in Adults: A Systematic Review of the Literature. *J Orofac Pain* 2013; 27(2): 99-110
34. Schiffman E, Ohrbach R, Truelove E, et al. Diagnostic Criteria for Temporomandibular Disorders (DC/TMD) for Clinical and Research Applications: Recommendations of the International RDC/TMD Consortium Network\* and Orofacial Pain Special Interest Group†. *J Oral Facial Pain Headache* 2014; 28(1): 6-27
35. Durham J, Newton-John TR ZJ. Temporomandibular disorders. *BMJ* 2015; 350: h1154
36. Van Dijk KD, Bidinosti M, Weiss A, Raijmakers P, Berendse HW, van de Berg WDJ. Reduced  $\alpha$ -synuclein levels in cerebrospinal fluid in Parkinson's disease are unrelated to clinical and imaging measures of disease severity. *Eur J Neurol* 2014; 21(3): 388-94
37. L. Naing, T. Winn, B.N. Rusli Practical Issues in Calculating the Sample Size for Prevalence Studies. *Archives of Orofacial Sciences* 2006; 1: 9-14
38. Berendse HW, Roos DS, Raijmakers P, Doty RL. Motor and non-motor correlates of olfactory dysfunction in Parkinson's disease. *J Neurol Sci* 2011; 310(1-2): 24-4
39. Ella B, Ghorayeb I, Burbaud P, Guehl D. Bruxism in Movement Disorders: A Comprehensive Review. *J Prosthodont* 2017; 26(7): 599-605
40. Goldstein RE, Auclair Clark W. The clinical management of awake bruxism. *J Am Dent Assoc* 2017; 148(6): 387-391
41. Kawakami S, Kumazaki Y, Manda Y, Oki K, Minagi S. Specific diurnal EMG activity pattern observed in occlusal collapse patients: Relationship between diurnal bruxism and tooth loss progression. *PLoS One* 2014; 9(7): e101882
42. Lobbezoo F. Taking up challenges at the interface of wear and tear. *J Dent Res*. 2007 Feb;86(2):101-3. 42.
43. Goetz CG, Tilley BC, Shaftman SR, et al. Movement Disorder Society-Sponsored Revision of the Unified Parkinson's Disease Rating Scale (MDS-UPDRS): Scale presentation and clinimetric testing results. *Mov Disord* 2008; 23(15): 2129-70 .
44. Nasreddine ZS, Phillips NA, Bédirian V, et al. The Montreal Cognitive Assessment, MoCA: A brief screening tool for

- 1  
2  
3 mild cognitive impairment. *J Am Geriatr Soc* 2005; 53(4): 695-9  
4  
5 45. Postuma RB, Berg D, Stern M, et al. MDS clinical diagnostic criteria for Parkinson's disease. *Mov Disord* 2015;  
6 30(12): 1591-601  
7  
8 46. Kulisevsky J, Fernández de Bobadilla R, Pagonabarraga J, et al. Measuring functional impact of cognitive  
9 impairment: validation of the Parkinson's disease cognitive functional rating scale. *Parkinsonism Relat Disord*  
10 2013; 19(9): 812-7  
11  
12 47. Hoehn MM, Yahr MD. Parkinsonism : onset, progression, and mortality Parkinsonism: onset, progression, and  
13 mortality. *Neurology* 1967; 17(5): 427-42  
14  
15 48. Tomlinson CL, Stowe R, Patel S, Rick C, Gray R, Clarke CE. Systematic review of levodopa dose equivalency  
16 reporting in Parkinson's disease. *Mov Disord* 2010; 25(15): 2649-53  
17  
18 49. Beck AT, Steer RA, Brown GK. Manual for the Beck depression inventory-II. *San Antonio, TX Psychol Corp* 1996; 4:  
19 561-571  
20  
21 50. Marin RS, Biedrzycki RC, Firinciogullari S. Reliability and validity of the apathy evaluation scale. *Psychiatry Res*  
22 1991; 38(2): 143-62  
23  
24 51. Leentjens AFG, Dujardin K, Pontone GM, Starkstein SE, Weintraub D, Martinez-Martin P. The Parkinson anxiety  
25 scale (PAS): Development and validation of a new anxiety scale. *Mov Disord* 2014; 29(8): 1035-1043  
26  
27 52. Voss T, Bahr D, Cummings J, Mills R, Ravina B, Williams H. Performance of a shortened Scale for Assessment of  
28 Positive Symptoms for Parkinson's disease psychosis. *Park Relat Disord* 2013; 19(3): 295-9  
29  
30 53. Weintraub D, Mamikonyan E, Papay K, Shea JA, Xie SX, Siderowf A. Questionnaire for impulsive-compulsive  
31 disorders in Parkinson's Disease-Rating Scale. *Mov Disord* 2012; 27(2): 242-7  
32  
33 54. Marinus J, Visser M, Van Hilten JJ, Lammers GJ, Stiggelbout AM. Assessment of sleep and sleepiness in parkinson  
34 disease. *Sleep* 2003; 26(8): 1049-1054  
35  
36 55. Jonasson C, Wernersson B, Hoff DAL, Hatlebakk JG. Validation of the GerdQ questionnaire for the diagnosis of  
37 gastro-oesophageal reflux disease. *Aliment Pharmacol Ther* 2013; 37(5): 564-72  
38  
39 56. Von Korff M, Ormel J, Keefe FJ, Dworkin SF. Grading the severity of chronic pain. *Pain* 1992; 50(2): 133-149  
40  
41 57. Chung F, Abdullah HR, Liao P. STOP-bang questionnaire a practical approach to screen for obstructive sleep apnea.  
42 *Chest* 2016; 149(3): 631-638  
43  
44 58. Wetselaar P, Lobbezoo F. The tooth wear evaluation system: A modular clinical guideline for the diagnosis and  
45 management planning of worn dentitions. *J Oral Rehabil* 2016; 43(1): 69-80  
46  
47 59. Das P, Challacombe SJ. Dry Mouth and Clinical Oral Dryness Scoring Systems. *Prim Dent J* 2016; 5(1): 77-79  
48  
49 60. Visscher CM, Naeije M, De Laat A, et al. Diagnostic accuracy of temporomandibular disorder pain tests: a  
50 multicenter study. *J Orofac Pain* 2009; 23(2): 108-114  
51  
52 61. Bracci A, Djukic G, Favero L, Salmaso L, Guarda-Nardini L, Manfredini D. Frequency of awake bruxism behaviours in  
53 the natural environment. A 7-day, multiple-point observation of real-time report in healthy young adults. *J Oral*  
54 *Rehabil* 2018; 45(6): 423-429  
55  
56 62. Maldupa I, Brinkmane A, Mihailova A. Comparative analysis of CRT buffer, GC saliva check buffer tests and  
57 laboratory titration to evaluate saliva buffering capacity. *Stomatologija* 2011; 13(2): 55-61  
58  
59 63. Stuginski-Barbosa J, Porporatti AL, Costa YM, Svensson P, Conti PCR. Diagnostic validity of the use of a portable  
60 single-channel electromyography device for sleep bruxism. *Sleep Breath* 2016; 20(2): 695-702  
61  
62 64. Olde Dubbelink KTE, Stoffers D, Deijen JB, Twisk JWR, Stam CJ, Berendse HW. Cognitive decline in Parkinson's  
63 disease is associated with slowing of resting-state brain activity: A longitudinal study. *Neurobiol Aging* 2013; 34(2):  
64 408-18  
65  
66 65. Martínez-Martín P, Rodríguez-Blázquez C, Alvarez M, et al. Parkinson's disease severity levels and MDS-Unified

- 1  
2  
3 Parkinson's Disease Rating Scale. *Park Relat Disord* 2015; 21(1): 50-4  
4  
5 66 Thissen AJAM, van Bergen F, de Jonghe JFM, Kessels RPC, Dautzenberg PLJ. Applicability and validity of the Dutch  
6 version of the Montreal Cognitive Assessment (moCA-d) in diagnosing MCI. *Tijdschr Gerontol Geriatr* 2010; 41(6):  
7 231-40  
8  
9 67. Ruzafa-Valiente E, Fernández-Bobadilla R, García-Sánchez C, Pagonabarraga J, Martínez-Horta S, Kulisevsky J.  
10 Parkinson's Disease - Cognitive Functional Rating Scale across different conditions and degrees of cognitive  
11 impairment. *J Neurol Sci* 2016; 361: 66-71  
12  
13 68. Beck A, Ward C, Mendelson M, Mock J, Erbaugh J. An inventory for measuring depression. *Arch Gen Psychiatry*  
14 1961; 4: 561-571  
15  
16 69. Bouman TK, Luteijn F, Albersnagel FA, der Ploeg Van. Enige ervaringen met de Beck depression inventory (BDI).  
17 *Gedrag Tijdschr voor Psychol* 1985; 13(2): 13-24  
18  
19 70. Fernandez HH, Aarsland D, Fénelon G, et al. Scales to assess psychosis in Parkinson's disease: Critique and  
20 recommendations. *Mov Disord* 2008; 23(4): 484-500  
21  
22 71. Lobbezoo F, Naeije M. A reliability study of clinical tooth wear measurements. *J Prosthet Dent* 2001; 86(6):597-602  
23  
24 72. Jenkinson C, Fitzpatrick R, Peto V, Greenhall R, Hyman N. The PDQ-8: Development and validation of a short-form  
25 Parkinson's disease questionnaire. *Psychol Heal* 1997; 12(6): 805-814  
26  
27 73. Kroenke K, Spitzer RL, Williams JBW. The PHQ-15: Validity of a new measure for evaluating the severity of somatic  
28 symptoms. *Psychosom Med* 2002; 64(2):258-66  
29  
30 74. Peduzzi P, Concato J, Kemper E, Holford TR, Feinstein AR. A simulation study of the number of events per variable  
31 in logistic regression analysis. *J Clin Epidemiol* 1996; 49(12): 1373-9  
32  
33 75. Field AP. *Discovering Statistics Using IBM SPSS Statistics: North American, 5th Edition*; 2017.  
34  
35  
36  
37  
38  
39  
40  
41  
42  
43  
44  
45  
46  
47  
48  
49  
50  
51  
52  
53  
54  
55  
56  
57  
58  
59  
60

## Figure Legends

Figure 1. Visualization of the possible interactions between the different research variables. *Parkinson's Disease (PD) is associated with bruxism through different variables: the dopaminergic system (pathophysiology) plays a role in both conditions; the prodromal phase of PD (RBD) shows the same characteristics during sleep as does bruxism; sleep disturbances lead to micro-arousals that can lead to bruxism; dopaminergic medication (levodopa) can influence bruxism; depression is one of the risk factors for bruxism and is more prevalent in patients with PD; and finally, both PD and bruxism are regulated centrally and not peripherally. PD is also associated with TMD: PD patients experience pain in the entire body (i.e., widespread pain), which is a risk factor for TMD pain; also, musculoskeletal pain (as in TMD pain) is frequently present; and finally, alterations in the striatal dopaminergic system (D1/D2 ratio) could play a role in TMD pain. Bruxism itself is a risk factor for TMD pain and vice versa. Besides, tooth wear can be a consequence of bruxism. When bruxism occurs, saliva can be increased, which can be a protective factor for tooth wear. Also, saliva can be changed due to PD medication. Finally, several exogenic, psychogenic, and physiologic factors can be a risk for bruxism.*

Figure 2. Flowchart of the study in which a distinction was made between the attendance of participants at the hospital and the study components at the participant's home. The intake and first survey is part of the regular care at the hospital, and only followed by an additional MRI and/or DAT-SPECT scan when indicated (dashed line). When patients are eligible and consent to participate (screening by phone), the additional data are collected after the intake. First, a questionnaire is filled in by the participants. After that, the participant is invited for the clinical examination. When questionnaires/screenings that are part of the regular care were filled in  $\geq 1$  year ago, participants will be asked to repeat this procedure simultaneously with the additional questionnaire and/or clinical examination. Finally, participants will sleep for 5 complete registration nights with the GrindCare for the assessment of sleep bruxism (when exclusion criterion 2 was not met) and use the BruxApp for 5 complete registration days for the assessment of awake bruxism (when exclusion criterion 3 was not met).

Figure 3. Flowchart of the data-analysis related to the first secondary aim: "to investigate which factors are influencing the presence of probable awake/sleep bruxism, TMD pain and the frequency of definite awake/sleep bruxism". All variables will be tested individually to see whether an association with the dependent variable (awake and sleep bruxism and TMD pain) exists, and to see how strong this association is (step 1). This dataset will be analysed for both probable bruxism and TMD pain with the use of logistic regression analyses. For definite bruxism, a linear regression analysis will be used (step 2). The forward selection procedure will be used for the (strongest) independent variables until all variables in this regression model show a  $P$ -value  $< 0.05$  (step 2). In both step 1 and step 2, a distinction will be made between sleep and awake bruxism.





Figure 1. Visualization of the possible interactions between the different research variables. *Parkinson's Disease (PD)* is associated with bruxism through different variables: the dopaminergic system (pathophysiology) plays a role in both conditions; the prodromal phase of PD (RBD) shows the same characteristics during sleep as does bruxism; sleep disturbances lead to micro-arousals that can lead to bruxism; dopaminergic medication (levodopa) can influence bruxism; depression is one of the risk factors for bruxism and is more prevalent in patients with PD; and finally, both PD and bruxism are regulated centrally and not peripherally. PD is also associated with TMD: PD patients experience pain in the entire body (i.e., widespread pain), which is a risk factor for TMD pain; also, musculoskeletal pain (as in TMD pain) is frequently present; and finally, alterations in the striatal dopaminergic system (D1/D2 ratio) could play a role in TMD pain. Bruxism itself is a risk factor for TMD pain and vice versa. Besides, tooth wear can be a consequence of bruxism. When bruxism occurs, saliva can be increased, which can be a protective factor for tooth wear. Also, saliva can be changed due to PD medication. Finally, several exogenic, psychogenic, and physiologic factors can be a risk for bruxism.

view only



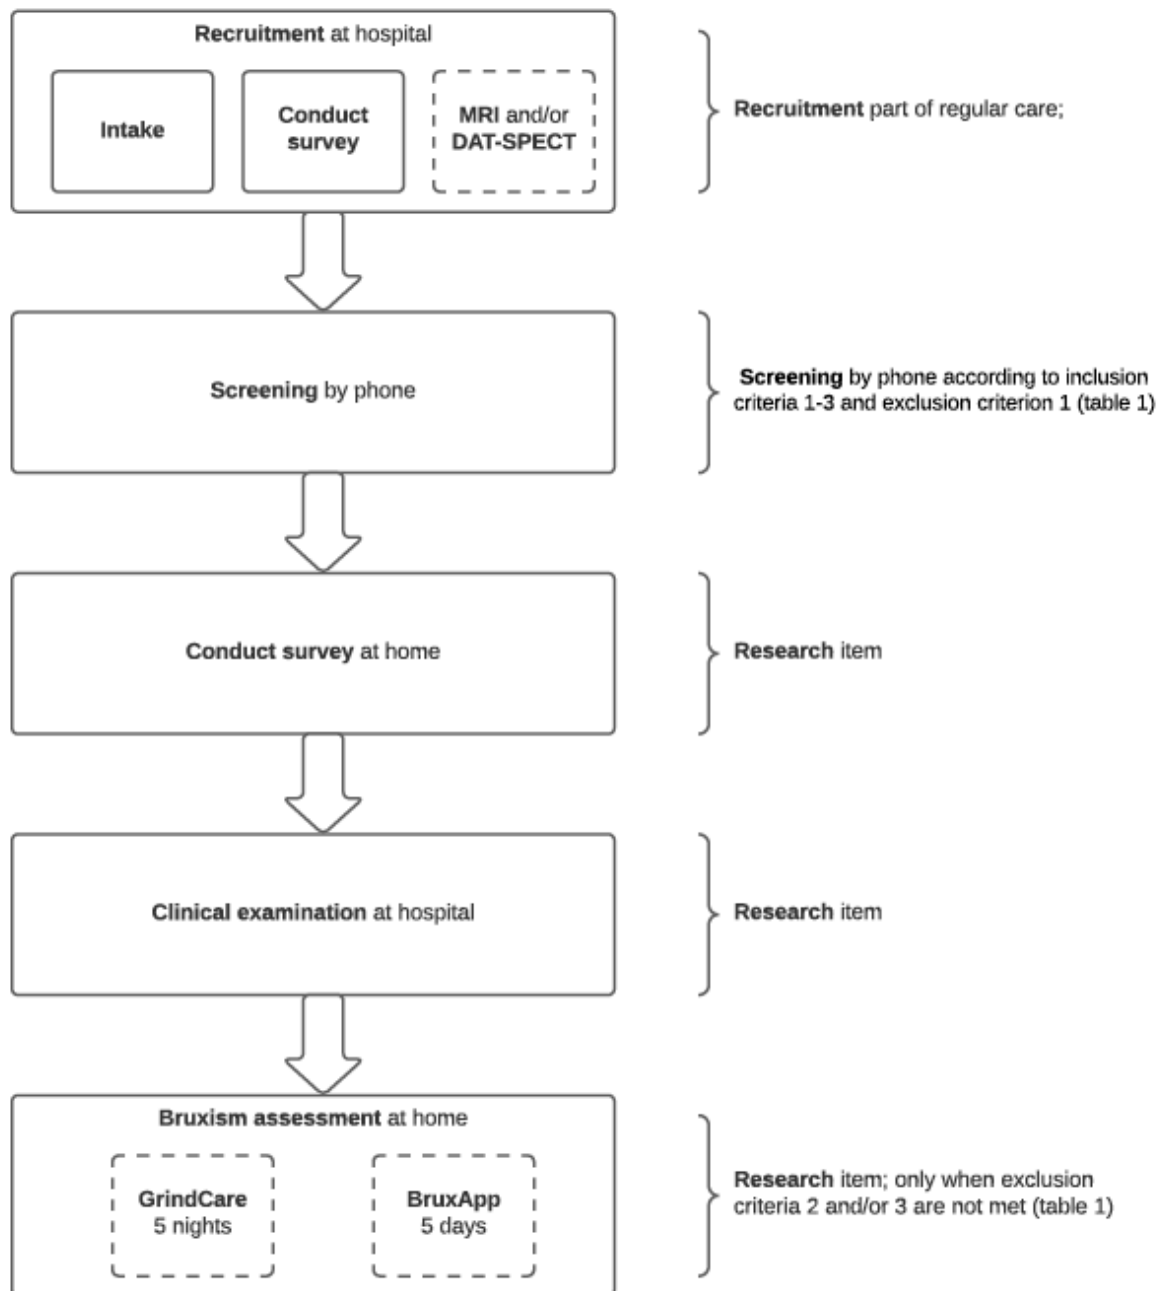

Figure 2. Flowchart of the study in which a distinction was made between the attendance of participants at the hospital and the study components at the participant's home. The intake and first survey is part of the regular care at the hospital, and only followed by an additional MRI and/or DAT-SPECT scan when indicated (dashed line). When patients are eligible and consent to participate (screening by phone), the additional data are collected after the intake. First, a questionnaire is filled in by the participants. After that, the participant is invited for the clinical examination. When questionnaires/screenings that are part of the regular care were filled in  $\geq 1$  year ago, participants will be asked to repeat this procedure simultaneously with the additional questionnaire and/or clinical examination. Finally, participants will sleep for 5 complete registration nights with the GrindCare for the assessment of sleep bruxism (when exclusion criterion 2 was not met) and use the BruxApp for 5 complete registration days for the assessment of awake bruxism (when exclusion criterion 3 was not met).



Figure 3. Flowchart of the data-analysis related to the first secondary aim: “to investigate which factors are influencing the presence of probable awake/sleep bruxism, TMD pain and the frequency of definite awake/sleep bruxism”. All variables will be tested individually to see whether an association with the dependent variable (awake and sleep bruxism and TMD pain) exists, and to see how strong this association is (step 1). This dataset will be analysed for both probable bruxism and TMD pain with the use of logistic regression analyses. For definite bruxism, a linear regression analysis will be used (step 2). The forward selection procedure will be used for the (strongest) independent variables until all variables in this regression model show a P-value <0.05 (step 2). In both step 1 and step 2, a distinction will be made between sleep and awake bruxism.

## Appendix 1

All secondary study parameters are listed below, along with a description of the questionnaires/ instruments that will be used for their assessment.

### General disease information:

- *Disease severity*: see motor symptoms.
- *Disease stage*: will be established with the Hoehn & Yahr scale. This is a 0 to 5 scale: “asymptomatic (score 0)”, “only unilateral involvement (score 1)”, “bilateral involvement without impairment of balance (score 2)”, “light to mild bilateral involvement, some postural instability and physically independent (score 3)”, “severe disability, still able to walk independent (score 4)”, and “wheelchair or bed bounded without help (score 5)”, in which a higher number means a more developed disease stage<sup>47</sup>.
- *Levodopa equivalent daily dosage (LEDD)*: this is, according to Tomlinson, a “summation of each individual antiparkinsonian drug aligned to 100mg immediate release L-dopa, by means of individual conversion factors”<sup>48,64</sup>.
- *Presynaptic dopaminergic loss*: will be analysed by means of DAT-SPECT, when applicable.

### Motor symptoms:

- *Motor symptoms*: will be analysed with the Movement Disorder Society Unified Parkinson Disease Rating Scale III (MDS-UPDRS III)<sup>43</sup>. This involves an examination of motor function, performed by an examiner (e.g., neurologist, trained nurse, or trained research assistant). The patient has to complete 18 motoric tasks. Subsequently, the examiner scores the tasks from 0 till 4: “normal (score 0)”, “slight (score 1)”, “mild (score 2)”, “moderate (score 3)”, and “severe (score 4)” motor problems for that specific part. Finally, a summation of each individual task is established, after that a classification can be made: “mild (score  $\leq$  32)”, “moderate (score 33-58)”, and “severe (score  $\geq$  59)” motor problems<sup>65</sup>.

### Non-motor symptoms:

- *Anxiety*: will be registered through the Parkinson Anxiety Scale (PAS)<sup>51</sup>. The PAS consists of 3 questionnaires (persistent anxiety, episodic anxiety, and avoidance behavior), with in total 12 questions. There are 5 response options, scored as 0 till 4: “never (score 0)”, “occasionally (score 1)”, “sometimes (score 2)”, “frequently (score 3)”, and “always (score 4)”. Afterwards, 4 groups can be made: “generalized anxiety disorder (score  $\geq$  11 on that subscale)”, “episodic anxiety (score  $\geq$  6 on that subscale)”, “avoidance behavior (score  $\geq$  5 on that subscale)”, and “any anxiety disorder score (score  $\geq$  14)”.
- *Apathy*: will be measured by means of the apathy evaluation scale (AES)<sup>50</sup>. This scale has 14 statements, with 4 response options: “not at all (score 0)”, “slightly (score 1)”, “somewhat (score 2)”, and “a lot (score 3)”. A total sum score of 42 can be reached. When a higher score is reached, apathy plays a bigger role. The cut off point for “high apathy score” is 14 points.
- *Cognitive function*: will be analysed by means of the Montreal Cognitive Assessment (MoCA)<sup>44,66</sup> and the Parkinson’s Disease Cognitive Functional Rating Scale, (PD-CFRS)<sup>46,67</sup>. The MoCA is a screening instrument for cognitive dysfunctions on different aspects, such as memory or language, which exist of 11 items in 8 different domains. The examiner (e.g., neurologist, trained nurse, or trained research assistant). scores

each item individually. A sum score of 30 can be reached, wherein a score of 26 or above represents a normal cognitive function and a score above 21 represents a mild cognitive impairment. The PD-CFRS exists of 12 questions with four response options, scored as follows: “No (score 0)”, “Sometimes (score 1)”, “A lot (score 2)” and “not applicable”. All questions answered with “not applicable” will be scored with the mean of all the other questions. A total score of 0-24 can be reached, a higher score means more cognitive problems. The total score will be used.

- Depression: will be registered through the Beck Depression Inventory (BDI-II)<sup>49,68,69</sup>. The BDI-II exists of 21 questions with four response options, scored as 0 till 4 (for example: “I do not feel sad”, “I feel sad much of the time”, “I am sad the whole time”, and “I am sad or so unhappy that I can’t stand it”). A maximum of 63 points can be assembled. Afterwards, 4 groups can be made: “none or minimal (score 0-13)”, “light (score 14-19)”, “moderate (score 20-28)”, and “severe (score 29-63)” depressive symptoms.
- Impulsive-compulsive behavior: will be analysed by means of the Questionnaire for Impulsive-Compulsive Disorders in Parkinson's Disease-Rating Scale (QUIP-RS)<sup>53</sup>. This questionnaire has 7 subscales and in total 28 questions, with 5 response options scored 0 till 4: “never (score 0)”, “occasionally (score 1)”, “sometimes (score 2)”, “frequently (score 3)”, and “a lot (score 3)”. For a combined impulse control disorder, 4 subscales are combined. A total sum score of 64 can be reached, a higher score indicating more impulsive-compulsive behavior. When 10 points or above are registered, an impulse control disorder is present.
- Psychosis: will be measured by means of Parkinson’s disease-adapted scale for assessment of positive symptoms (SAPS-PD)<sup>70</sup>. This 9-item observer-rated scale is scored from 0 till 5: “none (score 0)”, “possible (score 1)”, “mild (score 2)”, “mediocre (score 3)”, “explicit (score 4)”, and “severe (score 5)”, including a part about hallucinations and a part about disillusions. A higher sum score means a probable presence of psychosis. The total score will be used.
- Quality of sleep: is analysed by means of two types of questionnaires that are used in this study to assess this construct. The STOP-BANG-NL<sup>57</sup> questionnaire that screens for the risk for moderate to severe obstructive sleep apnea (OSA), and the Scales for Outcomes PD Sleep (SCOPA-sleep)<sup>54</sup> that screens for quality of sleep during the night and sleepiness during the day. The STOP-BANG-NL consists of 8 questions, with 2 response options: yes (score 1) and no (score 0). The total score ranges from 0-8, a classification can be made: “low risk for OSA (score < 3)”, “intermediate risk (score 3-4)” and “severe risk for OSA (≥ 5)”<sup>57</sup>. The SCOPA-Sleep questionnaire consists of 6 questions about daytime sleepiness, with 4 response options scored from 0 till 3: “never (score 0)”, “sometimes (score 1)”, “frequently (score 2)”, and “a lot (score 3)”, and 5 questions about night time sleep, with 4 response options scored from 0 till 3: “not at all (score 0)”, “somewhat (score 1)”, “quite (score 2)”, and “a lot (score 3)”. A higher score means more daytime sleepiness and/or more nighttime sleep problems.

#### **Oral health and dysfunction:**

- Reflux: will be analysed with the Gastroesophageal Reflux Disease Questionnaire (GERD-Q NL)<sup>55</sup>. This is a self-administered questionnaire with 4 graded Likert scales scored from 0-3 for predictors of GERD, and 2

reverse Likert scales scored from 3-0 for negative predictors of GERD. The response options are as follows: "0 days (score 0 or 3)", "1 day (score 1 or 2)", "2-3 days (score 2 or 1)", and "4-7 days (score 3 or 0)" dependent on a (reverse) likert scale. When a score of  $\geq 8$  is reached, there is a suspicion for GERD.

- Saliva: based on the Saliva Check Buffer© (GC EUROPE N.V), the quantity and quality (pH and buffer capacity) of saliva will be screened<sup>62</sup>. The buffer capacity stands for the capability of saliva to neutralize the environment of the mouth. Both saliva in rest and saliva that is stimulated during chewing will be investigated. An overview of the normal values is given in appendix 3. Additionally, in the clinical examination, a dry mouth screening by means of the Clinical Oral Dryness Score (CODS) will be performed, which includes a 10-item observer-rated dichotomous outcome questionnaire: "present (score 1)" and "absent (score 0)". When a summation is performed, the following cut-off points are applicable: "mild dryness (score 0-3)", "moderate dryness (score 4-6)", and "severe dryness (score >6)".
- TMD-pain intensity: will be analysed with the use of the Graded Chronic Pain Scale (GCPS)<sup>56</sup>. This is a 7-item questionnaire. Six items have an ordinal scale from 0 till 10, in which 0 stands for "no pain" and 10 for "the worst pain ever". Additionally, the amount of days that were disabling because of the pain in the last 30 days are noted. When scoring, 5 classifications can be made: "no pain (grade 0)", "low disability, low intensity (grade 1)", "low disability, high intensity (grade 2)", "high disability, moderately limiting (grade 3)", and "high disability-severely limiting (grade 4)".
- Tooth Wear: will be analysed with the screening module of the Tooth Wear Screening Index (TWES)<sup>58</sup> that quantifies the amount of tooth wear in 6 sextants of the mouth (right side, front, and left side of the upper jaw and the lower jaw) from 0 till 4: "no wear (score 0)", "visible wear within the enamel (score 1)", "visible wear with dentin exposure and loss of clinical crown height of  $\leq 1/3$  (score 2)", "loss of crown height  $>1/3$  but  $<2/3$  (score 3)" and "loss of crown height  $\geq 2/3$  (score 4)"<sup>71</sup>. Additionally, the palatal side of the upper front is also graded from 0 till 2: "no tooth wear (score 0)", "tooth wear confined to the enamel (score 1)", and "tooth wear with dentin exposure (score 2)". All numbers are scored per tooth and are not summed. The highest number will be used for analysis.

#### Miscellaneous:

- Lifestyle factors (smoking, alcohol, drugs): will be gathered by means of self-report in the standard-care questionnaire of the VUmc. Use of alcohol is noted as units per week. In case of smoking and use of drugs will be both quantified as a nominal variable (participants do (not) smoke and/or use drugs).
- Quality of life: will be analysed with the Parkinson's Disease Questionnaire – 8 (PDQ-8)<sup>72</sup>, by means of 8 questions about quality of life regarding PD. Participants can answer at an ordinal 5-item scale, with scores from 0 till 4: "Never (score 0)", "Occasionally (score 1)", "Sometimes (score 2)", "Often (score 3)", and "Always (score 4)". A score from 0 till 32 can be reached. When a higher score is applicable, poor health-related quality of life is present. The total score will be used.
- Somatic symptoms: will be analysed with the Patient Health Questionnaire – 15 (PHQ15)<sup>73</sup>. Severity of somatization is evaluated by means of 13 questions about somatic symptoms divided in 3 subscales, with scores 0 till 2: "not at all (score 0)", "bothered a little (score 1)", and "bothered a lot (score 2)". Additionally, two questions about sleep and tiredness are present, which are also divided in 3 subscales

with scores 0 till 2: “not at all (score 0)”, “several days (score 1)”, and “more than half of the days/nearly every day (score 2)”. Scores of 0, 5, and 15 are the cut-off points for “low”, “median”, and “high somatic symptom severity”, respectively.

## Appendix 2

The following formula was used for the sample size calculation:

$$n = (Z^2P(1-P))/d^2$$

Z = Z statistic for a level of confidence

P = expected prevalence or proportion (in proportion of one)

d = precision

For the level of confidence of 95%, Z value is 1.96.

With an assumed prevalence of 46% (WB according pilot study), P is 0.46

With a precision of +/-5 percentage points (0.05), d should be set at 0.05.

The numbers for the secondary aims are obtained when reaching the sample size for the primary aim. The approach for the sample size calculation of the secondary aims are as follows:

Since no clinical data of the variables that will be studied are available yet in a population with PD, an effect size is not known for our outcome measures. Nevertheless, in a recent questionnaire-based study, an association between PD on the one hand and bruxism and TMD pain on the other was reported<sup>25</sup>. The prevalence found for these outcome measures were 46.0%, 24.3%, and 29.5% for awake bruxism, sleep bruxism, and TMD pain, respectively. In the current study, a total of 6 independent categorized variables (see Table 4) will be analysed to determine if they are associated with the presence of probable and definite bruxism and/or TMD pain in patients with PD, by means of logistic and linear regression analyses (see statistical approach). We assume that only four predictors will be eligible for multivariate analysis, because (i) only predictors with the strongest associations are included, and (ii) predictors will drop out due to their probable association with each other. The literature about numbers of observations in participants per variable (events) in a logistic regression analysis indicated that for each predictor in a regression analysis, data from 10-20 events is needed<sup>74</sup>. Consequently, 15 events are chosen and thus (4x15=) 60 events are needed. Based on the prevalence of the recent questionnaire-based pilot study<sup>25</sup>, a minimum of 130 participants (60 events/0.46 (=prevalence of awake bruxism)) and a maximum of 246 participants (60 events/0.243 (=prevalence of sleep bruxism)) are needed<sup>25</sup>. For the linear regression, this estimate of the sample size is sufficient to detect medium and large effect sizes<sup>75</sup>. Because this is a wide range, an interim analysis will be done after the inclusion of at least 130 participants or a maximum of 6 months.

### Appendix 3

Cut off points for Saliva Check Buffer (GC EUROPE N.V), to determine whether the quantity and composition of saliva deviate from normal values.

| Saliva type    | Volume (ml)  | interpretation     | pH         | interpretation | Buffercapacity | Interpretation |
|----------------|--------------|--------------------|------------|----------------|----------------|----------------|
| During rest    | 1. >0.50     | 1. Hypersalivation | 1. >7.5    | 1. Abnormal    | 1. 10-12       | 1. Normal/high |
|                | 2. 0.50-0.25 | 2. Normal          | 2. 7.5-6.8 | 2. Normal      | 2. 6-9         | 2. Low         |
|                | 3. 0.24-0.10 | 3. Risk            | 3. 6.7-6.5 | 3. Risk        | 3. 0.5         | 3. Very low    |
|                | 4. <0.10     | 4. Pathologic      | 4. <6.5    | 4. Pathologic  |                |                |
| During chewing | 1. >2.00     | 1. Hypersalivation | 1. >8.0    | 1. Abnormal    | 1. 10-12       | 1. Normal/high |
|                | 2. 2.00-0.75 | 2. Normal          | 2. 8.0-7.0 | 2. Normal      | 2. 6-9         | 2. Low         |
|                | 3. 0.74-0.50 | 3. Risk            | 3. 6.9-6.5 | 3. Risk        | 3. 0-5         | 3. Very low    |
|                | 4. <0.50     | 4. Pathologic      | 4. <6.5    | 4. Pathologic  |                |                |

# Reporting checklist for protocol of a clinical trial.

Based on the SPIRIT guidelines.

## Instructions to authors

Complete this checklist by entering the page numbers from your manuscript where readers will find each of the items listed below.

Your article may not currently address all the items on the checklist. Please modify your text to include the missing information. If you are certain that an item does not apply, please write "n/a" and provide a short explanation.

Upload your completed checklist as an extra file when you submit to a journal.

In your methods section, say that you used the SPIRIT reporting guidelines, and cite them as:

Chan A-W, Tetzlaff JM, Altman DG, Laupacis A, Gøtzsche PC, Krleža-Jerić K, Hróbjartsson A, Mann H, Dickersin K, Berlin J, Doré C, Parulekar W, Summerskill W, Groves T, Schulz K, Sox H, Rockhold FW, Rennie D, Moher D. SPIRIT 2013 Statement: Defining standard protocol items for clinical trials. *Ann Intern Med.* 2013;158(3):200-207

|                                             |                     | Reporting Item                                                                                               | Page Number |
|---------------------------------------------|---------------------|--------------------------------------------------------------------------------------------------------------|-------------|
| <b>Administrative information</b>           |                     |                                                                                                              |             |
| Title                                       | <a href="#">#1</a>  | Descriptive title identifying the study design, population, interventions, and, if applicable, trial acronym | 1           |
| Trial registration                          | <a href="#">#2a</a> | Trial identifier and registry name. If not yet registered, name of intended registry                         | 1           |
| Trial registration: data set                | <a href="#">#2b</a> | All items from the World Health Organization Trial Registration Data Set                                     | 1           |
| Protocol version                            | <a href="#">#3</a>  | Date and version identifier                                                                                  | 1           |
| Funding                                     | <a href="#">#4</a>  | Sources and types of financial, material, and other support                                                  | 7           |
| Roles and responsibilities: contributorship | <a href="#">#5a</a> | Names, affiliations, and roles of protocol contributors                                                      | 7           |



|    |                           |                     |                                                                    |     |
|----|---------------------------|---------------------|--------------------------------------------------------------------|-----|
| 1  | Roles and                 | <a href="#">#5b</a> | Name and contact information for the trial sponsor                 | 7-8 |
| 2  | responsibilities:         |                     |                                                                    |     |
| 3  | sponsor contact           |                     |                                                                    |     |
| 4  | information               |                     |                                                                    |     |
| 5  |                           |                     |                                                                    |     |
| 6  |                           |                     |                                                                    |     |
| 7  |                           |                     |                                                                    |     |
| 8  | Roles and                 | <a href="#">#5c</a> | Role of study sponsor and funders, if any, in study design;        | 7-8 |
| 9  | responsibilities:         |                     | collection, management, analysis, and interpretation of data;      |     |
| 10 | sponsor and funder        |                     | writing of the report; and the decision to submit the report for   |     |
| 11 |                           |                     | publication, including whether they will have ultimate authority   |     |
| 12 |                           |                     | over any of these activities                                       |     |
| 13 |                           |                     |                                                                    |     |
| 14 |                           |                     |                                                                    |     |
| 15 |                           |                     |                                                                    |     |
| 16 | Roles and                 | <a href="#">#5d</a> | Composition, roles, and responsibilities of the coordinating       | n/a |
| 17 | responsibilities:         |                     | centre, steering committee, endpoint adjudication committee,       |     |
| 18 | committees                |                     | data management team, and other individuals or groups              |     |
| 19 |                           |                     | overseeing the trial, if applicable (see Item 21a for data         |     |
| 20 |                           |                     | monitoring committee)                                              |     |
| 21 |                           |                     |                                                                    |     |
| 22 |                           |                     |                                                                    |     |
| 23 |                           |                     |                                                                    |     |
| 24 | <b>Introduction</b>       |                     |                                                                    |     |
| 25 |                           |                     |                                                                    |     |
| 26 |                           |                     |                                                                    |     |
| 27 | Background and            | <a href="#">#6a</a> | Description of research question and justification for undertaking | 2-3 |
| 28 | rationale                 |                     | the trial, including summary of relevant studies (published and    |     |
| 29 |                           |                     | unpublished) examining benefits and harms for each intervention    |     |
| 30 |                           |                     |                                                                    |     |
| 31 |                           |                     |                                                                    |     |
| 32 | Background and            | <a href="#">#6b</a> | Explanation for choice of comparators                              | 4   |
| 33 | rationale: choice of      |                     |                                                                    |     |
| 34 | comparators               |                     |                                                                    |     |
| 35 |                           |                     |                                                                    |     |
| 36 |                           |                     |                                                                    |     |
| 37 | Objectives                | <a href="#">#7</a>  | Specific objectives or hypotheses                                  | 3   |
| 38 |                           |                     |                                                                    |     |
| 39 |                           |                     |                                                                    |     |
| 40 | Trial design              | <a href="#">#8</a>  | Description of trial design including type of trial (eg, parallel  | 4   |
| 41 |                           |                     | group, crossover, factorial, single group), allocation ratio, and  |     |
| 42 |                           |                     | framework (eg, superiority, equivalence, non-inferiority,          |     |
| 43 |                           |                     | exploratory)                                                       |     |
| 44 |                           |                     |                                                                    |     |
| 45 |                           |                     |                                                                    |     |
| 46 | <b>Methods:</b>           |                     |                                                                    |     |
| 47 | <b>Participants,</b>      |                     |                                                                    |     |
| 48 | <b>interventions, and</b> |                     |                                                                    |     |
| 49 | <b>outcomes</b>           |                     |                                                                    |     |
| 50 |                           |                     |                                                                    |     |
| 51 |                           |                     |                                                                    |     |
| 52 |                           |                     |                                                                    |     |
| 53 | Study setting             | <a href="#">#9</a>  | Description of study settings (eg, community clinic, academic      | 4   |
| 54 |                           |                     | hospital) and list of countries where data will be collected.      |     |
| 55 |                           |                     | Reference to where list of study sites can be obtained             |     |
| 56 |                           |                     |                                                                    |     |
| 57 |                           |                     |                                                                    |     |
| 58 |                           |                     |                                                                    |     |
| 59 |                           |                     |                                                                    |     |
| 60 |                           |                     |                                                                    |     |

|    |                              |                      |                                                                                                                                                                                                                                                                                                                                                                                |               |
|----|------------------------------|----------------------|--------------------------------------------------------------------------------------------------------------------------------------------------------------------------------------------------------------------------------------------------------------------------------------------------------------------------------------------------------------------------------|---------------|
| 1  | Eligibility criteria         | <a href="#">#10</a>  | Inclusion and exclusion criteria for participants. If applicable, eligibility criteria for study centres and individuals who will perform the interventions (eg, surgeons, psychotherapists)                                                                                                                                                                                   | 4             |
| 2  |                              |                      |                                                                                                                                                                                                                                                                                                                                                                                |               |
| 3  |                              |                      |                                                                                                                                                                                                                                                                                                                                                                                |               |
| 4  |                              |                      |                                                                                                                                                                                                                                                                                                                                                                                |               |
| 5  |                              |                      |                                                                                                                                                                                                                                                                                                                                                                                |               |
| 6  | Interventions:               | <a href="#">#11a</a> | Interventions for each group with sufficient detail to allow replication, including how and when they will be administered                                                                                                                                                                                                                                                     | n/a           |
| 7  | description                  |                      |                                                                                                                                                                                                                                                                                                                                                                                |               |
| 8  |                              |                      |                                                                                                                                                                                                                                                                                                                                                                                |               |
| 9  |                              |                      |                                                                                                                                                                                                                                                                                                                                                                                |               |
| 10 | Interventions:               | <a href="#">#11b</a> | Criteria for discontinuing or modifying allocated interventions for a given trial participant (eg, drug dose change in response to harms, participant request, or improving / worsening disease)                                                                                                                                                                               | n/a           |
| 11 | modifications                |                      |                                                                                                                                                                                                                                                                                                                                                                                |               |
| 12 |                              |                      |                                                                                                                                                                                                                                                                                                                                                                                |               |
| 13 |                              |                      |                                                                                                                                                                                                                                                                                                                                                                                |               |
| 14 |                              |                      |                                                                                                                                                                                                                                                                                                                                                                                |               |
| 15 | Interventions:               | <a href="#">#11c</a> | Strategies to improve adherence to intervention protocols, and any procedures for monitoring adherence (eg, drug tablet return; laboratory tests)                                                                                                                                                                                                                              | n/a           |
| 16 | adherence                    |                      |                                                                                                                                                                                                                                                                                                                                                                                |               |
| 17 |                              |                      |                                                                                                                                                                                                                                                                                                                                                                                |               |
| 18 |                              |                      |                                                                                                                                                                                                                                                                                                                                                                                |               |
| 19 |                              |                      |                                                                                                                                                                                                                                                                                                                                                                                |               |
| 20 | Interventions:               | <a href="#">#11d</a> | Relevant concomitant care and interventions that are permitted or prohibited during the trial                                                                                                                                                                                                                                                                                  | n/a           |
| 21 | concomitant care             |                      |                                                                                                                                                                                                                                                                                                                                                                                |               |
| 22 |                              |                      |                                                                                                                                                                                                                                                                                                                                                                                |               |
| 23 |                              |                      |                                                                                                                                                                                                                                                                                                                                                                                |               |
| 24 | Outcomes                     | <a href="#">#12</a>  | Primary, secondary, and other outcomes, including the specific measurement variable (eg, systolic blood pressure), analysis metric (eg, change from baseline, final value, time to event), method of aggregation (eg, median, proportion), and time point for each outcome. Explanation of the clinical relevance of chosen efficacy and harm outcomes is strongly recommended | 4,5,9-15      |
| 25 |                              |                      |                                                                                                                                                                                                                                                                                                                                                                                |               |
| 26 |                              |                      |                                                                                                                                                                                                                                                                                                                                                                                |               |
| 27 |                              |                      |                                                                                                                                                                                                                                                                                                                                                                                |               |
| 28 |                              |                      |                                                                                                                                                                                                                                                                                                                                                                                |               |
| 29 |                              |                      |                                                                                                                                                                                                                                                                                                                                                                                |               |
| 30 |                              |                      |                                                                                                                                                                                                                                                                                                                                                                                |               |
| 31 |                              |                      |                                                                                                                                                                                                                                                                                                                                                                                |               |
| 32 |                              |                      |                                                                                                                                                                                                                                                                                                                                                                                |               |
| 33 |                              |                      |                                                                                                                                                                                                                                                                                                                                                                                |               |
| 34 | Participant timeline         | <a href="#">#13</a>  | Time schedule of enrolment, interventions (including any run-ins and washouts), assessments, and visits for participants. A schematic diagram is highly recommended (see Figure)                                                                                                                                                                                               | 4,5<br>(+fig) |
| 35 |                              |                      |                                                                                                                                                                                                                                                                                                                                                                                |               |
| 36 |                              |                      |                                                                                                                                                                                                                                                                                                                                                                                |               |
| 37 |                              |                      |                                                                                                                                                                                                                                                                                                                                                                                |               |
| 38 |                              |                      |                                                                                                                                                                                                                                                                                                                                                                                |               |
| 39 |                              |                      |                                                                                                                                                                                                                                                                                                                                                                                |               |
| 40 | Sample size                  | <a href="#">#14</a>  | Estimated number of participants needed to achieve study objectives and how it was determined, including clinical and statistical assumptions supporting any sample size calculations                                                                                                                                                                                          | 5             |
| 41 |                              |                      |                                                                                                                                                                                                                                                                                                                                                                                |               |
| 42 |                              |                      |                                                                                                                                                                                                                                                                                                                                                                                |               |
| 43 |                              |                      |                                                                                                                                                                                                                                                                                                                                                                                |               |
| 44 |                              |                      |                                                                                                                                                                                                                                                                                                                                                                                |               |
| 45 | Recruitment                  | <a href="#">#15</a>  | Strategies for achieving adequate participant enrolment to reach target sample size                                                                                                                                                                                                                                                                                            | 4-5           |
| 46 |                              |                      |                                                                                                                                                                                                                                                                                                                                                                                |               |
| 47 |                              |                      |                                                                                                                                                                                                                                                                                                                                                                                |               |
| 48 |                              |                      |                                                                                                                                                                                                                                                                                                                                                                                |               |
| 49 | <b>Methods: Assignment</b>   |                      |                                                                                                                                                                                                                                                                                                                                                                                |               |
| 50 | <b>of interventions (for</b> |                      |                                                                                                                                                                                                                                                                                                                                                                                |               |
| 51 | <b>controlled trials)</b>    |                      |                                                                                                                                                                                                                                                                                                                                                                                |               |
| 52 |                              |                      |                                                                                                                                                                                                                                                                                                                                                                                |               |
| 53 |                              |                      |                                                                                                                                                                                                                                                                                                                                                                                |               |
| 54 | Allocation: sequence         | <a href="#">#16a</a> | Method of generating the allocation sequence (eg, computer-generated random numbers), and list of any factors for stratification. To reduce predictability of a random sequence, details of any planned restriction (eg, blocking) should be                                                                                                                                   | n/a           |
| 55 | generation                   |                      |                                                                                                                                                                                                                                                                                                                                                                                |               |
| 56 |                              |                      |                                                                                                                                                                                                                                                                                                                                                                                |               |
| 57 |                              |                      |                                                                                                                                                                                                                                                                                                                                                                                |               |
| 58 |                              |                      |                                                                                                                                                                                                                                                                                                                                                                                |               |
| 59 |                              |                      |                                                                                                                                                                                                                                                                                                                                                                                |               |
| 60 |                              |                      |                                                                                                                                                                                                                                                                                                                                                                                |               |

provided in a separate document that is unavailable to those who enrol participants or assign interventions

|                                                           |                      |                                                                                                                                                                                                                                                                                                                                                                                                              |     |
|-----------------------------------------------------------|----------------------|--------------------------------------------------------------------------------------------------------------------------------------------------------------------------------------------------------------------------------------------------------------------------------------------------------------------------------------------------------------------------------------------------------------|-----|
| Allocation concealment mechanism                          | <a href="#">#16b</a> | Mechanism of implementing the allocation sequence (eg, central telephone; sequentially numbered, opaque, sealed envelopes), describing any steps to conceal the sequence until interventions are assigned                                                                                                                                                                                                    | n/a |
| Allocation: implementation                                | <a href="#">#16c</a> | Who will generate the allocation sequence, who will enrol participants, and who will assign participants to interventions                                                                                                                                                                                                                                                                                    | n/a |
| Blinding (masking)                                        | <a href="#">#17a</a> | Who will be blinded after assignment to interventions (eg, trial participants, care providers, outcome assessors, data analysts), and how                                                                                                                                                                                                                                                                    | n/a |
| Blinding (masking): emergency unblinding                  | <a href="#">#17b</a> | If blinded, circumstances under which unblinding is permissible, and procedure for revealing a participant's allocated intervention during the trial                                                                                                                                                                                                                                                         | n/a |
| <b>Methods: Data collection, management, and analysis</b> |                      |                                                                                                                                                                                                                                                                                                                                                                                                              |     |
| Data collection plan                                      | <a href="#">#18a</a> | Plans for assessment and collection of outcome, baseline, and other trial data, including any related processes to promote data quality (eg, duplicate measurements, training of assessors) and a description of study instruments (eg, questionnaires, laboratory tests) along with their reliability and validity, if known. Reference to where data collection forms can be found, if not in the protocol | 4-5 |
| Data collection plan: retention                           | <a href="#">#18b</a> | Plans to promote participant retention and complete follow-up, including list of any outcome data to be collected for participants who discontinue or deviate from intervention protocols                                                                                                                                                                                                                    | n/a |
| Data management                                           | <a href="#">#19</a>  | Plans for data entry, coding, security, and storage, including any related processes to promote data quality (eg, double data entry; range checks for data values). Reference to where details of data management procedures can be found, if not in the protocol                                                                                                                                            | n/a |
| Statistics: outcomes                                      | <a href="#">#20a</a> | Statistical methods for analysing primary and secondary outcomes. Reference to where other details of the statistical analysis plan can be found, if not in the protocol                                                                                                                                                                                                                                     | 5   |

|    |                            |                      |                                                                    |     |
|----|----------------------------|----------------------|--------------------------------------------------------------------|-----|
| 1  | Statistics: additional     | <a href="#">#20b</a> | Methods for any additional analyses (eg, subgroup and adjusted     | 5   |
| 2  | analyses                   |                      | analyses)                                                          |     |
| 3  |                            |                      |                                                                    |     |
| 4  | Statistics: analysis       | <a href="#">#20c</a> | Definition of analysis population relating to protocol non-        | 5   |
| 5  | population and missing     |                      | adherence (eg, as randomised analysis), and any statistical        |     |
| 6  | data                       |                      | methods to handle missing data (eg, multiple imputation)           |     |
| 7  |                            |                      |                                                                    |     |
| 8  |                            |                      |                                                                    |     |
| 9  |                            |                      |                                                                    |     |
| 10 | <b>Methods: Monitoring</b> |                      |                                                                    |     |
| 11 |                            |                      |                                                                    |     |
| 12 | Data monitoring:           | <a href="#">#21a</a> | Composition of data monitoring committee (DMC); summary of         | 5   |
| 13 | formal committee           |                      | its role and reporting structure; statement of whether it is       |     |
| 14 |                            |                      | independent from the sponsor and competing interests; and          |     |
| 15 |                            |                      | reference to where further details about its charter can be found, |     |
| 16 |                            |                      | if not in the protocol. Alternatively, an explanation of why a     |     |
| 17 |                            |                      | DMC is not needed                                                  |     |
| 18 |                            |                      |                                                                    |     |
| 19 |                            |                      |                                                                    |     |
| 20 |                            |                      |                                                                    |     |
| 21 |                            |                      |                                                                    |     |
| 22 | Data monitoring:           | <a href="#">#21b</a> | Description of any interim analyses and stopping guidelines,       | 5   |
| 23 | interim analysis           |                      | including who will have access to these interim results and make   |     |
| 24 |                            |                      | the final decision to terminate the trial                          |     |
| 25 |                            |                      |                                                                    |     |
| 26 |                            |                      |                                                                    |     |
| 27 | Harms                      | <a href="#">#22</a>  | Plans for collecting, assessing, reporting, and managing solicited | 4-5 |
| 28 |                            |                      | and spontaneously reported adverse events and other unintended     |     |
| 29 |                            |                      | effects of trial interventions or trial conduct                    |     |
| 30 |                            |                      |                                                                    |     |
| 31 |                            |                      |                                                                    |     |
| 32 |                            |                      |                                                                    |     |
| 33 | Auditing                   | <a href="#">#23</a>  | Frequency and procedures for auditing trial conduct, if any, and   | 4-5 |
| 34 |                            |                      | whether the process will be independent from investigators and     |     |
| 35 |                            |                      | the sponsor                                                        |     |
| 36 |                            |                      |                                                                    |     |
| 37 |                            |                      |                                                                    |     |
| 38 | <b>Ethics and</b>          |                      |                                                                    |     |
| 39 | <b>dissemination</b>       |                      |                                                                    |     |
| 40 |                            |                      |                                                                    |     |
| 41 |                            |                      |                                                                    |     |
| 42 | Research ethics            | <a href="#">#24</a>  | Plans for seeking research ethics committee / institutional review | 7   |
| 43 | approval                   |                      | board (REC / IRB) approval                                         |     |
| 44 |                            |                      |                                                                    |     |
| 45 |                            |                      |                                                                    |     |
| 46 | Protocol amendments        | <a href="#">#25</a>  | Plans for communicating important protocol modifications (eg,      | 7   |
| 47 |                            |                      | changes to eligibility criteria, outcomes, analyses) to relevant   |     |
| 48 |                            |                      | parties (eg, investigators, REC / IRBs, trial participants, trial  |     |
| 49 |                            |                      | registries, journals, regulators)                                  |     |
| 50 |                            |                      |                                                                    |     |
| 51 |                            |                      |                                                                    |     |
| 52 |                            |                      |                                                                    |     |
| 53 | Consent or assent          | <a href="#">#26a</a> | Who will obtain informed consent or assent from potential trial    | 4   |
| 54 |                            |                      | participants or authorised surrogates, and how (see Item 32)       |     |
| 55 |                            |                      |                                                                    |     |
| 56 |                            |                      |                                                                    |     |
| 57 |                            |                      |                                                                    |     |
| 58 |                            |                      |                                                                    |     |
| 59 |                            |                      |                                                                    |     |
| 60 |                            |                      |                                                                    |     |

|    |                          |                      |                                                                      |         |
|----|--------------------------|----------------------|----------------------------------------------------------------------|---------|
| 1  | Consent or assent:       | <a href="#">#26b</a> | Additional consent provisions for collection and use of              | n/a     |
| 2  | ancillary studies        |                      | participant data and biological specimens in ancillary studies, if   |         |
| 3  |                          |                      | applicable                                                           |         |
| 4  |                          |                      |                                                                      |         |
| 5  |                          |                      |                                                                      |         |
| 6  | Confidentiality          | <a href="#">#27</a>  | How personal information about potential and enrolled                | 4-5,7   |
| 7  |                          |                      | participants will be collected, shared, and maintained in order to   |         |
| 8  |                          |                      | protect confidentiality before, during, and after the trial          |         |
| 9  |                          |                      |                                                                      |         |
| 10 |                          |                      |                                                                      |         |
| 11 | Declaration of interests | <a href="#">#28</a>  | Financial and other competing interests for principal investigators  | 8       |
| 12 |                          |                      | for the overall trial and each study site                            |         |
| 13 |                          |                      |                                                                      |         |
| 14 |                          |                      |                                                                      |         |
| 15 | Data access              | <a href="#">#29</a>  | Statement of who will have access to the final trial dataset, and    | 7       |
| 16 |                          |                      | disclosure of contractual agreements that limit such access for      |         |
| 17 |                          |                      | investigators                                                        |         |
| 18 |                          |                      |                                                                      |         |
| 19 |                          |                      |                                                                      |         |
| 20 | Ancillary and post trial | <a href="#">#30</a>  | Provisions, if any, for ancillary and post-trial care, and for       | n/a     |
| 21 | care                     |                      | compensation to those who suffer harm from trial participation       |         |
| 22 |                          |                      |                                                                      |         |
| 23 |                          |                      |                                                                      |         |
| 24 | Dissemination policy:    | <a href="#">#31a</a> | Plans for investigators and sponsor to communicate trial results     | 7       |
| 25 | trial results            |                      | to participants, healthcare professionals, the public, and other     |         |
| 26 |                          |                      | relevant groups (eg, via publication, reporting in results           |         |
| 27 |                          |                      | databases, or other data sharing arrangements), including any        |         |
| 28 |                          |                      | publication restrictions                                             |         |
| 29 |                          |                      |                                                                      |         |
| 30 |                          |                      |                                                                      |         |
| 31 |                          |                      |                                                                      |         |
| 32 |                          |                      |                                                                      |         |
| 33 | Dissemination policy:    | <a href="#">#31b</a> | Authorship eligibility guidelines and any intended use of            | 7,8     |
| 34 | authorship               |                      | professional writers                                                 |         |
| 35 |                          |                      |                                                                      |         |
| 36 |                          |                      |                                                                      |         |
| 37 | Dissemination policy:    | <a href="#">#31c</a> | Plans, if any, for granting public access to the full protocol,      | 7       |
| 38 | reproducible research    |                      | participant-level dataset, and statistical code                      |         |
| 39 |                          |                      |                                                                      |         |
| 40 |                          |                      |                                                                      |         |
| 41 | <b>Appendices</b>        |                      |                                                                      |         |
| 42 |                          |                      |                                                                      |         |
| 43 | Informed consent         | <a href="#">#32</a>  | Model consent form and other related documentation given to          | n/a     |
| 44 | materials                |                      | participants and authorised surrogates                               | (dutch) |
| 45 |                          |                      |                                                                      |         |
| 46 |                          |                      |                                                                      |         |
| 47 | Biological specimens     | <a href="#">#33</a>  | Plans for collection, laboratory evaluation, and storage of          | n/a     |
| 48 |                          |                      | biological specimens for genetic or molecular analysis in the        |         |
| 49 |                          |                      | current trial and for future use in ancillary studies, if applicable |         |
| 50 |                          |                      |                                                                      |         |
| 51 |                          |                      |                                                                      |         |
| 52 |                          |                      |                                                                      |         |
| 53 |                          |                      |                                                                      |         |
| 54 |                          |                      |                                                                      |         |
| 55 |                          |                      |                                                                      |         |
| 56 |                          |                      |                                                                      |         |
| 57 |                          |                      |                                                                      |         |
| 58 |                          |                      |                                                                      |         |
| 59 |                          |                      |                                                                      |         |
| 60 |                          |                      |                                                                      |         |

# BMJ Open

## Parkinson's disease, temporomandibular disorder pain, and bruxism and its clinical consequences. A protocol of a single-centre observational outpatient study

|                                 |                                                                                                                                                                                                                                                                                                     |
|---------------------------------|-----------------------------------------------------------------------------------------------------------------------------------------------------------------------------------------------------------------------------------------------------------------------------------------------------|
| Journal:                        | <i>BMJ Open</i>                                                                                                                                                                                                                                                                                     |
| Manuscript ID                   | bmjopen-2021-052329.R2                                                                                                                                                                                                                                                                              |
| Article Type:                   | Protocol                                                                                                                                                                                                                                                                                            |
| Date Submitted by the Author:   | 10-Feb-2022                                                                                                                                                                                                                                                                                         |
| Complete List of Authors:       | Verhoeff, Merel; ACTA, Orofacial Pain and Dysfunction<br>Koutris, Michail; ACTA, Orofacial Pain and Dysfunction<br>Berendse, Henk; Amsterdam University Medical Centres<br>Dijk van, Karin; Epilepsy Netherlands Foundation Sleep-Wake Centre<br>Lobbezoo, F.; ACTA, Orofacial Pain and Dysfunction |
| <b>Primary Subject Heading</b>: | Dentistry and oral medicine                                                                                                                                                                                                                                                                         |
| Secondary Subject Heading:      | Dentistry and oral medicine, Neurology, Geriatric medicine                                                                                                                                                                                                                                          |
| Keywords:                       | Parkinson-s disease < NEUROLOGY, EPIDEMIOLOGY, Motor neurone disease < NEUROLOGY, ORAL MEDICINE                                                                                                                                                                                                     |
|                                 |                                                                                                                                                                                                                                                                                                     |

SCHOLARONE™  
Manuscripts

# Parkinson's disease, temporomandibular disorder pain, and bruxism and its clinical consequences. A protocol of a single-centre observational outpatient study

---

M.C. Verhoeff, DDS, MSc<sup>1</sup> – M.C.Verhoeff@acta.nl  
M. Koutris, DDS, PhD<sup>1</sup> – M.Koutris@acta.nl  
H.W. Berendse, MD, PhD<sup>2</sup> – H.Berendse@amsterdamumc.nl  
K.D. van Dijk, MD, PhD<sup>2,3</sup> – [Kvdijk@sein.nl](mailto:Kvdijk@sein.nl)  
F. Lobbezoo, DDS, PhD<sup>1</sup> – F.Lobbezoo@acta.nl

<sup>1</sup>Department Orofacial Pain and Dysfunction, Academic Centre for Dentistry Amsterdam (ACTA), University of Amsterdam and Vrije Universiteit Amsterdam, Gustav Mahlerlaan 3004, 1081 LA Amsterdam, The Netherlands

<sup>2</sup>Amsterdam University Medical Centres, Vrije Universiteit Amsterdam, Neurology, Amsterdam Neuroscience, De Boelelaan 1117, 1081 HV Amsterdam, The Netherlands

<sup>3</sup>Sleep Wake Centre, Stichting Epilepsie Instellingen Nederland (SEIN), Achterweg 2, 2103 SW Heemstede, The Netherlands

## Corresponding author:

M.C. Verhoeff  
Gustav Mahlerlaan 3004  
1081 LA Amsterdam  
M.C.Verhoeff@acta.nl

## Abstract

**Introduction:** A recent questionnaire-based study suggested that bruxism and painful temporomandibular disorders (TMD pain) may be more prevalent in Parkinson's disease (PD) patients compared to controls. The presence of both bruxism and TMD pain may negatively influence patients' quality of life. The present study is designed to clinically and more objectively investigate the presence of bruxism and TMD pain in PD patients. The secondary aim of the study is to identify factors associated with bruxism and TMD pain in PD patients, such as disease severity and dopaminergic medication usage. Furthermore, the presence of tooth wear in PD patients will be studied as this can be a major consequence of bruxism. Finally, deviations in saliva composition that may contribute to tooth wear will be studied.

**Methods and analysis:** This is a single-centre observational outpatient study at the Amsterdam University Medical Centres, location VUmc. All patients with a clinical diagnosis of PD will be eligible for inclusion. Participants will fill in a set of questionnaires. Subsequently, patients will be examined clinically for, amongst others, TMD pain, presence and severity of tooth wear, and deviations in saliva composition. Sleep-time registrations will take place for 5 nights with the GrindCare<sup>®</sup> GC4 (i.e., a portable, single-channel electromyographic recorder) to assess sleep bruxism and simultaneously by the use of the BruxApp for 5 days to assess awake bruxism. We will partly use data collected during standard clinical care, to minimize patient burden.

**Ethics and dissemination:** The scientific and ethical aspects of this study protocol have been approved by the Medical Ethics Review Committee of the Amsterdam UMC, location VUmc; NL. 2019.143). Informed consent will be obtained from all participants. The results will be published in a peer-reviewed journal, if relevant presented at conferences, and published as part of a Ph.D. thesis.

**Trial registration:** NL8307

**Keywords:** Parkinson's Disease; Temporomandibular Disorders; Bruxism; Tooth wear; Saliva; Protocol

**Strengths and limitations of this study:**



- 1  
2  
3 50 - This observational study will provide accurate data on the presence of painful temporomandibular  
4 51 disorders and bruxism in Parkinson patients attending the outpatient clinic for movement disorders of  
5 52 Amsterdam UMC, location VUmc, and their possible associated factors like disease severity and  
6 53 medication usage.  
7  
8 54 - Novel information about tooth wear and saliva composition and quantity in patients with Parkinson's  
9 55 disease will be collected.  
10 56 - Since polysomnographic recordings for the assessment of definite sleep bruxism are not feasible in this  
11 57 study, a portable, single-channel electromyographic recorder is used instead.  
12 58 - Electromyographic recordings will be performed for several nights in a row, thus taking into account the  
13 59 fluctuating nature of sleep bruxism.  
14 60 - Because of the design of this study, no causal relationships can be established between the outcome  
15 61 variables and predictors.  
16 62

## 63 Introduction

64 Parkinson's disease (PD) is a neurodegenerative movement disorder characterized by motor symptoms, in  
65 particular rigidity, bradykinesia, and tremor<sup>1,2</sup>. Patients with PD do not solely experience motor symptoms, but  
66 also non-motor symptoms like anxiety, depression, sleep problems, and cognitive dysfunction<sup>3,4</sup>. Besides, pain  
67 has been reported as one of the most troublesome non-motor symptoms in PD patients, early in their  
68 disease, which could affect patients' quality of life<sup>5,6</sup>.

69  
70 Due to global ageing, the prevalence of PD is estimated to increase significantly in the near future. Ageing is  
71 associated with oral health-related issues, which may therefore occur more frequently in the near future as  
72 well<sup>7</sup>. Dentists regularly see patients with bruxism in the dental office, which is an oral health-related issue  
73 that is not necessarily associated with systemic diseases. Bruxism is currently defined as "a repetitive jaw-  
74 muscle activity characterized by clenching or grinding of the teeth and/or by bracing or thrusting of the  
75 mandible"<sup>8</sup>. It can occur during sleep, indicated as sleep bruxism, or during wakefulness, indicated as awake  
76 bruxism<sup>8</sup>. Not only bruxism itself, but also its possible consequences, such as mechanical tooth wear and  
77 temporomandibular disorders (TMD), have hardly been studied in patients with PD. TMD is a collective term  
78 embracing disorders of the temporomandibular joint, masticatory muscles, and adjacent anatomical  
79 structures<sup>9</sup>. TMD can present as painful and non-painful conditions. Patients with TMD can report, for  
80 example, orofacial pain (including headache), limitations in the movement of the mandible, and joint noises<sup>9</sup>.  
81 Both tooth wear and TMD may affect the oral health-related quality of life<sup>10</sup>.

82  
83 In a population with PD patients, oral health was recently studied<sup>11</sup>. It was shown that the oral health in PD  
84 patients is deteriorated as compared to their peers without PD. Besides, medication usage can influence  
85 salivation production, which in turn influences the oral environment<sup>12</sup>. Also, gastrointestinal problems are  
86 more frequently shown in patients with PD. In turn, this could influence the presence of tooth wear due to  
87 reflux<sup>13,14</sup>.

88



1  
2  
3 89 While oral health in PD has not been studied widely<sup>11</sup>, oral (dys-)function in PD has been studied even less,  
4 90 even though PD, bruxism, and TMD have been suggested to share several common characteristics (see Figure  
5 91 1). Similar to PD, bruxism is a condition that is considered to be regulated centrally and not peripherally<sup>15</sup>. In  
6 92 addition, in the pathophysiology of both PD and bruxism, the brain dopamine system plays an important role<sup>16-  
7 93 18</sup>. Besides, sleep disturbances<sup>19</sup> that are present both in PD<sup>20</sup> and in sleep bruxism, are associated with arousal  
8 94 activity<sup>19,21</sup>. As a result of such arousal activity, sleep bruxism may occur more frequently in people with sleep  
9 95 disturbances than in those without<sup>21</sup>. Also, in the prodromal phase of PD, a higher rhythmic masticatory  
10 96 muscle activity (RMMA) on polysomnography in NREM sleep has been observed, compared to controls<sup>22</sup>. This  
11 97 is a characteristic that is also seen in sleep bruxism patients<sup>23</sup>. Furthermore, bruxism may be considered as a  
12 98 risk factor for TMD, depending on the assessment methods used<sup>24</sup>. TMD itself shares some characteristics with  
13 99 PD. For example, musculoskeletal pain (of which TMD pain is a subtype) is frequently reported by patients with  
14 100 PD<sup>3,25</sup>. Finally, suggestions have been put forward that alterations in the dopaminergic system are also present  
15 101 in patients with pain in the orofacial region<sup>26</sup>, although this remains to be confirmed in patients with TMD  
16 102 pain.

17 103  
18 104 Recently, a questionnaire-based pilot study in 368 patients with PD and 340 controls suggested a higher  
19 105 prevalence of bruxism and TMD pain in patients with PD<sup>27</sup>. Also, PD patients reported a higher mean TMD-pain  
20 106 intensity than controls<sup>27</sup>. Besides, a large Taiwanese study showed a two-fold increased risk of TMD in patients  
21 107 with PD as compared to controls<sup>28</sup>. However, because of the limitations of the described studies (e.g.,  
22 108 questionnaire-based study<sup>27</sup>; no international validated clinical examination used; no detailed explanation of  
23 109 the clinical examination given; and only newly diagnosed TMD-patients included)<sup>28</sup>, extrapolation of these  
24 110 findings requires further verification through clinical and instrumental data. Hence, to overcome some of the  
25 111 limitations, the present protocol was designed. The planned study will acquire more objective clinical and  
26 112 instrumental measures for awake and sleep bruxism and TMD pain, which can give more valid information on  
27 113 outcomes like the presence of bruxism in this population. Also, additional factors, such as the severity of PD  
28 114 and cognitive function, will be included as possible predictors for bruxism and/or TMD pain in PD patients.  
29 115 Knowledge of the factors that can influence bruxism and/or TMD pain in patients with PD will help dentists  
30 116 and other oral health care providers to provide individualised care to prevent and/or alleviate symptoms of  
31 117 bruxism and/or TMD pain and their consequences in this vulnerable group of patients.

32 118  
33 119 Based on the above-summarized evidence, the primary aim of this study is to investigate the presence of  
34 120 bruxism and TMD pain in PD patients, through objective clinical and instrumental measurements. Based on our  
35 121 pilot-study outcomes<sup>27</sup>, we hypothesise that the prevalence of bruxism and TMD pain in the current  
36 122 population will be higher than in their peers without PD, as described in the literature<sup>29,30</sup>.

37 123  
38 124 In addition, the secondary aims and their corresponding hypotheses are the following:

- 1  
2  
3 125 1. To identify which factors are associated with bruxism and TMD pain in PD patients. We hypothesise that  
4 126 factors like medication usage<sup>16</sup>, disease severity<sup>15,17</sup>, psychosocial factors<sup>31-33</sup>, and lifestyle factors<sup>31,32,34</sup> are  
5 127 influencing the studied associations.  
6  
7 128 2. To investigate whether the salivary flow, the pH, and the buffer capacity of saliva in patients with PD are  
8 129 related to the severity of tooth wear. Our hypothesis is that in patients with PD, the saliva composition  
9 130 and salivary flow deviate from normal standards and that this is associated with the severity of tooth  
10 131 wear<sup>14</sup>.  
11  
12 132 3. To investigate with Dopamine Transporter Single Photon Emission Computed Tomography (DAT-SPECT)  
13 133 whether there is a relationship between the degree of presynaptic dopaminergic loss and the presence of  
14 134 bruxism in these patients. The hypothesis is that there is a difference in striatal dopaminergic deficit  
15 135 between PD patients with and without bruxism, in which patients without bruxism show a smaller deficit.  
16  
17  
18  
19  
20 136  
21  
22  
23  
24  
25  
26  
27  
28  
29  
30  
31  
32  
33  
34  
35  
36  
37  
38  
39  
40  
41  
42  
43  
44  
45  
46  
47  
48  
49  
50  
51  
52  
53  
54  
55  
56  
57  
58  
59  
60

## 137 **Methods and analysis**

138 The design of this study is a single-centre observational outpatient study that will take place at the  
 139 Department of Neurology of the Amsterdam University Medical Centres (Amsterdam UMC), location VUmc.  
 140 The data collection will take place for two years. Due to the COVID-19 pandemic, the start date is delayed.  
 141 However, the estimated start and end dates will be January 2023 and January 2025, respectively.

### 143 **Participants and eligibility**

144 Patients already clinically diagnosed with PD or planned for an intake appointment with presumable PD at the  
 145 outpatient clinic for movement disorders of the VUmc, will be eligible to participate in the study. Yearly, about  
 146 100-120 new consultations for PD are seen in the outpatient clinic. In addition, patients already receiving  
 147 treatment at the VUmc are eligible for participation as well. The inclusion and exclusion criteria are listed in  
 148 Table 1.

150 *Table 1. Inclusion and Exclusion criteria. When patients have a pacemaker, they cannot use the GrindCare® GC4 (i.e., a  
 151 portable, single-channel electromyographic recorder to detect sleep bruxism) and will be excluded from that specific part of  
 152 the study. When patients do not have a smartphone, participants cannot use the BruxApp (i.e., an application on a  
 153 smartphone to assess awake bruxism) and will be excluded from that specific part of the study.*

| Inclusion criteria                                                | Exclusion criteria                                              |
|-------------------------------------------------------------------|-----------------------------------------------------------------|
| 1. ≥18 years of age                                               | 1. atypical parkinsonian syndromes                              |
| 2. ≥ 21 on the Montreal Cognitive Assessment (MoCA) <sup>35</sup> | 2. for using the GrindCare: pacemaker                           |
| 3. fulfil clinical diagnostic criteria for PD <sup>36</sup>       | 3. for using the BruxApp: no smartphone                         |
|                                                                   | 4. for the DAT-SPECT: no deep brain stimulation implant present |

### 155 **Study procedure**

156 In Figure 2, the study procedure is visualized. If patients agree to participate in the study, they will be asked to  
 157 sign an informed consent. This study will be performed in parallel to the routine clinical care (see Table 2) at  
 158 the Amsterdam UMC, location VUmc. When questionnaires/screenings were filled in ≥ 1 year ago, participants  
 159 will be asked to repeat this. Specifically, for this study, additional information will be obtained in the form of a  
 160 set of questionnaires that participants can fill in at home and of a clinical examination at the hospital (see  
 161 Table 3). The neurologist will determine whether additional brain imaging (viz., MRI or DAT-SPECT) is  
 162 necessary, mainly in cases of clinical doubt. The estimated percentage of additional brain imaging in newly  
 163 referred patients is 40%.

165 *Table 2. Questionnaires and clinical data collected as part of the regular care at the hospital, which is used in this  
 166 observational study. See Appendix 1 for a description per questionnaire/instrument.*

| Variables standard care hospital                                                                                                                           |
|------------------------------------------------------------------------------------------------------------------------------------------------------------|
| 1. Cognitive function (Montreal Cognitive Assessment, MoCA) <sup>35</sup> ; (Parkinson's Disease Cognitive Functional Rating Scale, PD-CFRS) <sup>37</sup> |
| 2. Disease stage (Hoehn & Yahr) <sup>38</sup> ; Disease severity (Unified Parkinson's Disease Rating Scale – III, UPDRS-III) <sup>39</sup>                 |

|    |                                                                                                                                                                                                                                                                                                                                                                                                                                                    |
|----|----------------------------------------------------------------------------------------------------------------------------------------------------------------------------------------------------------------------------------------------------------------------------------------------------------------------------------------------------------------------------------------------------------------------------------------------------|
| 3. | Dopaminergic medication (Levodopa equivalent daily dose, LEDD) <sup>40</sup>                                                                                                                                                                                                                                                                                                                                                                       |
| 4. | Neuropsychiatric symptoms: Depression (Beck Depression Inventory-ii, BDI-ii) <sup>41</sup> ; Apathy (Apathy evaluation scale, AES) <sup>42</sup> ; Anxiety (Parkinson Anxiety Scale, PAS) <sup>43</sup> ; Psychotic (Parkinson's Disease-adapted scale for assessment of positive symptoms, SAPS-PD) <sup>44</sup> ; Impulse control (Questionnaire for Impulsive-Compulsive Disorders in Parkinson's Disease-Rating Scale, QUIP-RS) <sup>45</sup> |
| 5. | Presynaptic dopaminergic loss, when applicable (brain imaging) (Dopamine Transporter Single Photon Emission Computed Tomography, DAT-SPECT) <sup>46,47</sup>                                                                                                                                                                                                                                                                                       |
| 6. | Quality of sleep (Scales for Outcomes PD Sleep, SCOPA-SLEEP) <sup>48</sup>                                                                                                                                                                                                                                                                                                                                                                         |
| 7. | Stimulants usage: Alcohol (per unit, daily), Drugs (per unit, daily), Smoking (per unit, daily)                                                                                                                                                                                                                                                                                                                                                    |

167

168

169

Table 3. Additional research components, i.e., performed in addition to the regular appointments at the hospital. See Appendix 1 for a description per questionnaire/instrument.

| Additional research components |                                                                                                                                                                                                           |
|--------------------------------|-----------------------------------------------------------------------------------------------------------------------------------------------------------------------------------------------------------|
| Questionnaires                 | 1. Reflux (GerdQ-NL) <sup>49</sup>                                                                                                                                                                        |
|                                | 2. TMD pain (according to the Diagnostic Criteria for TMD, DC/TMD) <sup>50</sup> and intensity (graded chronic pain scale, GCPS) <sup>51</sup>                                                            |
|                                | 3. Tooth wear                                                                                                                                                                                             |
|                                | 4. Sleep (Obstructive Sleep Apnea, STOP-Bang NL) <sup>52</sup>                                                                                                                                            |
| Clinical examination           | 1. Intra-oral examination (positive symptoms of bruxism (viz., clenching marks in the soft tissues of the cheek, tongue or lip, mechanical tooth wear, hypertrophy of the masseter muscle)) <sup>50</sup> |
|                                | 2. Quantitative tooth wear screening (part of the Tooth Wear Evaluation System, TWES) <sup>53</sup>                                                                                                       |
|                                | 3. A brief screening of the dental prosthesis (when applicable)                                                                                                                                           |
|                                | 4. Dry mouth screening (Clinical Oral Dryness Score, CODS) <sup>54</sup>                                                                                                                                  |
|                                | 5. Jaw-mobility examination (DC/TMD) <sup>50</sup>                                                                                                                                                        |
|                                | 6. Joint noises examination (DC/TMD) <sup>50</sup>                                                                                                                                                        |
|                                | 7. Palpation of masticatory muscles and temporomandibular joints (DC/TMD) <sup>50</sup>                                                                                                                   |
|                                | 8. Dynamic/static tests <sup>55</sup>                                                                                                                                                                     |
|                                | 9. Bruxoprovocationtest <sup>55</sup>                                                                                                                                                                     |
|                                | 10. Saliva test (Saliva-Check Buffer <sup>®</sup> ) <sup>58-56</sup>                                                                                                                                      |
| Registration                   | 1. BruxApp <sup>56-57</sup>                                                                                                                                                                               |
|                                | 2. GrindCare <sup>®</sup> GC4 <sup>59,60</sup> --- <sup>58,59</sup>                                                                                                                                       |

170

171

### Main study parameters

172

The main study parameters or endpoints are “presence of bruxism (sleep and/or awake)” as well as “diagnosis of TMD pain”. For the assessment of sleep bruxism, patients will be asked to sleep 5 complete registration nights with a portable, single-channel electromyographic recorder, viz., the GrindCare<sup>®</sup> GC4 (Sunstar Suisse SA, Etoy, Switzerland)<sup>58,59</sup>. For the assessment of awake bruxism, patients will use, for 5 complete registration days, the BruxApp<sup>57,60</sup>, which is a mobile application for the recording of bruxism activity based on ecological momentary assessment<sup>8</sup>. According to international consensus, a classification of the probability that bruxism is present can be made as follows: possible, probable, and definite bruxism presence<sup>8</sup>. In this research, all probabilities of bruxism presence can be determined, however, the highest probability will be used (viz., both

179

1  
2  
3 180 probable and definite). When patients cannot use the GrindCare® GC4 and/or BruxApp, and more certainty  
4 181 towards a definite presence is thus impossible, probable bruxism presence will be determined with the use of  
5 182 data from the clinical examination, based on the presence of positive symptoms of bruxism (viz., clenching  
6 183 marks in the soft tissues of the cheek, tongue, or lip, mechanical tooth wear (attrition), and/or hypertrophy of  
7 184 the masseter muscle)<sup>8</sup>.

11 185 The TMD-pain diagnosis will be established according to the Diagnostic Criteria for TMD (DC/TMD)<sup>50</sup>, with the  
12 186 use of standardized questionnaires and clinical examination procedures. Based on the collected data, the  
13 187 following diagnoses can be set: myalgia (local myalgia, myofascial pain, myofascial pain with referral),  
14 188 arthralgia, headache attributed to TMD, and non-painful joint disorders (disc displacement with reduction, disc  
15 189 displacement with reduction with intermitted locking, disc displacement without reduction with limited mouth  
16 190 opening, disc displacement without reduction without limited mouth opening, degenerative joint disease,  
17 191 subluxation). The main focus of this research protocol will be the TMD-pain diagnosis, for the establishment of  
18 192 which the diagnostic flow chart of the DC/TMD will be used<sup>50</sup>.

### 193 **Secondary study parameters**

194 To identify which factors are associated with bruxism and TMD pain in PD patients, several variables will be  
195 evaluated (see Tables 2 and 3), using different clinical/instrumental measures (see appendix 1-3). Most of  
196 these variables have already been reported as possible risk factors for bruxism<sup>32</sup> and/or TMD<sup>61</sup> in the general  
197 population<sup>31-33</sup>. However, the variables dopaminergic medication usage and disease stage/severity of PD have  
198 not been studied yet in the association with bruxism or TMD pain in PD patients. Finally, if DAT-SPECT imaging  
199 is available, we will compare the measured presynaptic striatal dopaminergic deficit between participants with  
200 and without bruxism<sup>46</sup>.

### 202 **Sample size**

203 According the pilot study, the prevalence of awake bruxism, sleep bruxism, and TMD pain in patients with PD is  
204 46%, 24%, and 29.5%, respectively<sup>23</sup>. Taking the cautious approach, we calculated the sample size for all  
205 conditions and chose the largest sample size. Aiming for a precision of 5% with a level of confidence of 95%,  
206 246 participants are needed<sup>62</sup>. See appendix 2 for the sample size calculation. Furthermore, the approach to  
207 calculate the sample size for the most important secondary aim (viz., to identify which factors are associated  
208 with bruxism and TMD pain in PD patients) is also shown in appendix 2. The numbers are obtained when  
209 reaching the sample size for the primary aim.

### 211 **Statistical approach**

212 With the use of descriptive tests, demographic data will be summarised. In Figure 3, it is shown how the  
213 dataset is analysed to give an answer on which factor is associated with the presence/absence of probable  
214 bruxism/TMD pain or with the frequency (i.e., the number of bruxism events per hour) of definite bruxism. The  
215 forward selection procedure will be used for the (strongest) independent variables (see Table 4) until all  
216 variables in this regression model show a P-value <0.05 (See Step 2, Figure 3). Finally, to analyse if there is an

217 association between tooth wear and composition of saliva, Spearman's correlation coefficient will be used. For  
 218 the DAT-SPECT, a semi-quantitative analysis will be used. Ratios for specific versus non-specific binding will be  
 219 calculated for the regions of interest (viz., left and right putamen and caudate nucleus, using the occipital  
 220 cortex as a reference area) and analysed using the independent sample t-test<sup>46,47</sup>.

221

222 *Table 4. The independent variables (categorized) that will be investigated for one of the secondary aims: which factors are*  
 223 *associated with the presence of bruxism and TMD pain in patients with Parkinson's Disease?*

| Independent variables (categorized) |                                                                                                         |
|-------------------------------------|---------------------------------------------------------------------------------------------------------|
| 1.                                  | Bruxism (when analysing which factors are associated with the presence of TMD pain in patients with PD) |
| 2.                                  | Neuropsychiatric symptoms (depression, anxiety, apathy, psychosis, impulse disorders)                   |
| 3.                                  | Parkinson's Disease (disease stage, disease severity, medication usage, cognitive function)             |
| 4.                                  | Sleep (quality of sleep, obstructive sleep apnea)                                                       |
| 5.                                  | Stimulants usage (alcohol, smoking, drugs)                                                              |
| 6.                                  | TMD pain (when analysing which factors are associated with the presence of bruxism in patients with PD) |
| 7.                                  | Tooth Wear related (reflux, saliva, dry mouth)                                                          |

224

### 225 Patient and public involvement

226 Neither patients nor the community were involved in the design or performance of this study. However,  
 227 feedback from participants of the earlier pilot study<sup>23</sup> was used to design this study. The burden for the  
 228 participants will be kept as minimal as possible. On request, the outcomes of this study will be disseminated to  
 229 the participants.

### 230 Discussion

231 The primary aim of this study is to objectively measure the presence of bruxism and TMD pain in a population  
 232 of patients with Parkinson's Disease (PD). Furthermore, the three secondary aims are described as follows: (i)  
 233 to identify which factors are associated with bruxism and TMD pain in PD patients, (ii) to investigate whether  
 234 the salivary flow, the pH, and the buffer capacity of saliva in patients with PD are related to the severity of  
 235 tooth wear, and finally (iii) to investigate with DAT-SPECT whether there is a relationship between the degree  
 236 of presynaptic dopaminergic loss and the presence of bruxism in these patients.

237

238 To the best of our knowledge, this is the first study that attempts to objectively measure the presence of  
 239 awake bruxism, sleep bruxism, and TMD pain in a population of patients with PD. Previous studies investigated  
 240 the prevalence of awake bruxism in this population, however only few participants were included or only  
 241 questionnaires were used<sup>23,63</sup>. When quantifying bruxism with continuous data, recent insights showed a  
 242 better quality of a definite bruxism diagnosis<sup>8</sup>. Nevertheless, we used a dichotomous outcome in this protocol  
 243 study to answer our first aim, i.e., to investigate the presence of bruxism. Besides, we also included self-report  
 244 and clinical data, which do not yield continuous outcomes. Despite this, in the present study, the use of the  
 245 GrindCare<sup>®</sup> GC4 and the BruxApp can give more certainty towards a definite establishment of sleep and awake  
 246 bruxism, respectively<sup>8</sup>. This enables the analysis of continuous outcomes, which has been suggested by several

1  
2  
3 247 authors<sup>64,65</sup>. However, as mentioned earlier, not every participant will be able to use the GrindCare® GC4  
4 248 and/or the Bruxapp. Therefore, this protocol is designed to include all probability levels for the assessment of  
5  
6 249 bruxism, which contributes to the feasibility of this protocol<sup>8</sup>. In addition, the clinical examination according  
7  
8 250 to the DC/TMD<sup>50</sup> enables setting a valid TMD-pain diagnosis, making a distinction between several TMD  
9  
10 251 complaints, and comparing the outcomes with other (inter-) national research.

11 252  
12 253 Because PD patients are vulnerable and burdened with frequent visits to multiple caregivers (e.g., their  
13  
14 254 neurologist, physiotherapist, and speech therapist), it is important to burden the participants as minimally as  
15  
16 255 possible. Therefore, during the process of designing this study and collecting the data, a multidisciplinary  
17  
18 256 approach was established between neurologists and dentists to enable an as efficient as possible usage of the  
19  
20 257 patient's time and energy.

21 258  
22 259 The targeted number of inclusions will be a challenge. However, the calculated sample size is an estimation,  
23  
24 260 because no clinical prevalences are known as yet. Like in otherwise healthy individuals, clenching and grinding  
25  
26 261 are not always recognized by the patients themselves<sup>66,67</sup>, thus the prevalence of sleep bruxism in the pilot  
27  
28 262 study could have been underestimated. This means that the calculated sample size in this study might be  
29  
30 263 higher than eventually required. Therefore, an interim analysis will be performed after 130 included  
31  
32 264 participants or 6 months.

33 265  
34 266 This study has no longitudinal character and therefore, no causal relations can be observed between the (in-  
35  
36 267 dependent variables. Also, polysomnography is the golden standard to detect sleep bruxism while in the  
37  
38 268 present study, a portable electromyographic recorder will be used<sup>8</sup>. However, since this device will be used for  
39  
40 269 several nights in a row, the fluctuating character of sleep bruxism can be taken into account and is therefore  
41  
42 270 considered a good proxy for definite sleep bruxism<sup>59</sup>. It should be noted, however, that the portable recorder  
43  
44 271 will fail to enable a distinction between jaw-muscle activities related to sleep bruxism and those related to  
45  
46 272 other orofacial movement disorders like oral dyskinesia and oro-mandibular dystonia<sup>68</sup>. This is an important  
47  
48 273 issue, because such movement disorders can be present in patients with PD related to their medication usage.  
49  
50 274 Fortunately, in the questionnaire and clinical examination of the MDS-UPDRS<sup>39</sup> (Table 2), the presence of oral  
51  
52 275 dyskinesia and oro-mandibular dystonia is included. Hence, it is possible to correct for their presence in the  
53  
54 276 data analysis.

55 277  
56 278 In conclusion, this study will give more detailed information about the presence of bruxism and TMD pain in  
57  
58 279 patients with PD, as well as about possible associated factors like medication usage and severity of the disease.  
59  
60 280 Finally, more clinically relevant information will become available for dentists and other oral health care  
281  
282 281 professionals about the amount of tooth wear and the composition of saliva in patients with PD.



## 282 **Ethics and dissemination:**

283 This study protocol has been approved by the Medical Ethics Review Committee of Amsterdam UMC, location  
284 VUmc; NL. 2019.143). Informed consent will be obtained from all participants. A data monitor will meet  
285 annually to primarily concentrate on the safety of patients, and will be monitoring the collected data and  
286 informed consents. The results will be published in peer-reviewed journals, if relevant presented at  
287 conferences, and published as part of a Ph.D. thesis.

288  
289 Due to the sensitive nature of personal information, all data will be blinded and stored in secure  
290 environments. Only the executive researcher and the head of the department can reach the unblinded  
291 informed consents and the key for unblinding. These are stored separately. Digital data will be stored  
292 pseudonymized in a secure database using Castor EDC (CDISC, Amsterdam, Netherlands). Detailed methods for  
293 data management and storage can be obtained by contacting the corresponding author.

## 294 **Authors contribution**

295 All authors (MV, MK, KvD, HB and FL) were involved in designing this study. MV obtained the approval of the  
296 Medical Ethics Review Committee and drafted the manuscript. Finally, all authors (MV, MK, KvD, HB and FL)  
297 gave feedback on the draft and approved the final manuscript.

## 298 **Funding statement:**

299 This work was partly supported by the foundation for Oral Health and Parkinson's Disease (Stichting Mondzorg  
300 & Parkinson), the Dutch association for scientific dentistry (Nederlandse Wetenschappelijke Vereniging voor  
301 Tandheelkunde (NWVT)), and the Dutch association for Orofacial Pain, Dysfunction and Prosthetic Dentistry  
302 (Nederlandse Vereniging voor Gnathologie en Prothetische Tandheelkunde (NVGPT)).

## 303 **Competing interest**

304 Dr. Lobbezoo reports grants and other from Sunstar Suisse SA, grants from Somnomed, grants from Airway  
305 Management, grants from Vivisol-Resmed, grants from Health Holland, outside the submitted work.



## References

1. Kalia L V, Lang AE, Shulman G. Parkinson's disease. *Lancet* 2015; 386(9996): 896-912
2. Opara JA, Matecki A, Małecka E, Socha T. Motor assessment in parkinson's disease. *Ann Agric Environ Med* 2017; 24(3): 411-415
3. Khoo TK, Yarnall AJ, Duncan GW, et al. The spectrum of nonmotor symptoms in early Parkinson disease. *Neurology* 2013; 80(3): 276-281
4. Chaudhuri KR, Healy DG, Schapira AH V. Non-motor symptoms of Parkinson's disease: diagnosis and management. *Lancet Neurol* 2006; 5(3): 235-45.
5. Politis, M., Wu, K., Molloy, S., P, G. B., Chaudhuri, K. R., & Piccini, P. (2010). Parkinson's disease symptoms: the patient's perspective. *Mov Disord*, 25(11), 1646-1651
6. Silverdale, M. A., Kobylecki, C., Kass-Iliyya, L., Martinez-Martin, P., Lawton, M., Cotterill, S., et al. (2018). A detailed clinical study of pain in 1957 participants with early/moderate Parkinson's disease. *Parkinsonism Relat Disord*, 56, 27-32.
7. Ettinger RL. Oral health and the aging population. *J Am Dent Assoc* 2007; 138(suppl): 5S-6S
8. Lobbezoo F, Ahlberg J, Raphael KG, et al. International consensus on the assessment of bruxism: Report of a work in progress. *J Oral Rehabil* 2018; 45(11): 837-844
9. Leeuw R de, Klasser GD. *Orofacial Pain: Guidelines for Assessment, Diagnosis, and Management. 5th edition.* Chicago: Quintessence Publishing Co; 2013
10. Papagianni CE, van der Meulen MJ, Naeije M, Lobbezoo F. Oral health-related quality of life in patients with tooth wear. *J Oral Rehabil* 2013; 40(3): 185-90
11. Stiphout MAE van, Marinus J, Hilten JJ Van, Lobbezoo F, Baat C De. Oral Health of Parkinson's Disease Patients: A Case-Control Study. *Parkinson Dis* 2018; e9315285
12. Villa A, Wolff A, Narayana N, et al. World Workshop on Oral Medicine VI: a systematic review of medication-induced salivary gland dysfunction. *Oral Dis* 2016; 22(5): 365-82
13. Maeda T, Nagata K, Satoh Y, Yamazaki T, Takano D. High prevalence of gastroesophageal reflux disease in Parkinson's disease: A questionnaire-based study. *Parkinsons Dis* 2013; e742128
14. Wetselaar P, Manfredini D, Ahlberg J, et al. Associations between tooth wear and dental sleep disorders: A narrative overview. *J Oral Rehabil* 2019;
15. Lobbezoo F, Naeije M. Bruxism is mainly regulated centrally, not peripherally. *J Oral Rehabil* 2001; 28(12): 1085-1091
16. Lobbezoo F, Lavigne GJ, Tanguay R, Montplaisir JY. The effect of the catecholamine precursor L-dopa on sleep bruxism: A controlled clinical trial. *Mov Disord* 1997; 12(1): 73-78
17. Lobbezoo F, Soucy J, Montplaisir JY, Lavigne GJ. Striatal D2 Receptor Binding in Sleep Bruxism : A Controlled Study with Iodine-123-Iodobenzamide and Single-photon-emission Computed Tomography. *J Dent Res* 1996; 75(10): 1804-10
18. Lobbezoo F, Soucy JP, Hartman NG, Montplaisir JY, Lavigne GJ. Effects of the D2 receptor agonist bromocriptine on sleep bruxism: report of two single-patient clinical trials. *J Dent Res* 1997; 76(9): 1610-1614
19. Albers JA, Chand P, Anch AM. Multifactorial sleep disturbance in Parkinson's disease. *Sleep Med* 2017; 35: 41-48
20. Menza M, Dobkin RD, Marin H, Bienfait K. Sleep disturbances in Parkinson's disease. *Mov Disord* 2010; 25(suppl 1): S117-22
21. Kato T, Montplaisir JY, Guitard F, Sessle BJ, Lund JP, Lavigne GJ. Evidence that experimentally induced sleep bruxism is a consequence of transient arousal. *J Dent Res* 2003; 82(4): 284-8
22. Abe S, Gagnon JF, Montplaisir JY, et al. Sleep bruxism and oromandibular myoclonus in rapid eye movement sleep

- behavior disorder: A preliminary report. *Sleep Med* 2013; 14(10): 1024-1030
23. Lavigne GJ, Rompré PH, Poirier G, Huard H, Kato T, Montplaisir JY. Rhythmic masticatory muscle activity during sleep in humans. *J Dent Res* 2001; 80(2): 443-8
24. Manfredini D, Lobbezoo F. Relationship between bruxism and temporomandibular disorders: a systematic review of literature from 1998 to 2008. *Oral Surg Oral Med Oral Pathol Oral Radiol Endod.* 2010;109(6):e26-e50
25. Tai Y-C, Lin C-H. An overview of pain in Parkinson's disease. *Clin Park Relat Disord* 2020; 2: 1-8
26. Hagelberg N, Forssell H, Aalto S, et al. Altered dopamine D2 receptor binding in atypical facial pain. *Pain* 2003; 106(1-2): 43-48
27. Verhoeff MC, Lobbezoo F, Wetselaar P, Aarab G, Koutris M. Parkinson's disease, temporomandibular disorders and bruxism: A pilot study. *J Oral Rehabil* 2018; 45(11): 854-863
28. Chen Y-Y, Fan H-C, Tung M-C, Chang Y-K. The association between Parkinson's disease and temporomandibular disorder. *PLoS One.* 2019;14(6):e0217763. doi:10.1371/journal.pone.0217763
29. Wetselaar P, Vermaire EJH, Lobbezoo F, Schuller AA. The prevalence of awake bruxism and sleep bruxism in the Dutch adult population. *J Oral Rehabil* 2019; 46(7): 617-623
30. Visscher CM, Ligthart L, Schuller AA, et al. Comorbid Disorders and Sociodemographic Variables in Temporomandibular Pain in the General Dutch Population. *J Oral Facial Pain Headache* 2015; 29(1): 51-9
31. Van Selms MKA, Visscher CM, Naeije M, Lobbezoo F. Bruxism and associated factors among Dutch adolescents. *Community Dent Oral Epidemiol* 2013; 41(4): 353-363
32. Manfredini D, Lobbezoo F. Role of psychosocial factors in the etiology of bruxism. *J Orofac Pain* 2009; 23(2): 153-66
33. Winocur E, Uziel N, Lisha T, Goldsmith C, Eli I. Self-reported Bruxism associations with perceived stress, motivation for control, dental anxiety and gagging. *J Oral Rehabil* 2011; 38(1): 3-11
34. Castroflorio T, Bargellini A, Rossini G, Cugliari G, Deregibus A. Sleep bruxism and related risk factors in adults: A systematic literature review. *Arch Oral Biol* 2017; 83:25-32
35. Nasreddine ZS, Phillips NA, Bédirian V, et al. The Montreal Cognitive Assessment, MoCA: A brief screening tool for mild cognitive impairment. *J Am Geriatr Soc* 2005; 53(4): 695-9
36. Postuma RB, Berg D, Stern M, et al. MDS clinical diagnostic criteria for Parkinson's disease. *Mov Disord* 2015; 30(12): 1591-601
37. Kulisevsky J, Fernández de Bobadilla R, Pagonabarraga J, et al. Measuring functional impact of cognitive impairment: validation of the Parkinson's disease cognitive functional rating scale. *Parkinsonism Relat Disord* 2013; 19(9): 812-7
38. Hoehn MM, Yahr MD. Parkinsonism : onset, progression, and mortality Parkinsonism: onset, progression, and mortality. *Neurology* 1967; 17(5): 427-42
39. Goetz CG, Tilley BC, Shaftman SR, et al. Movement Disorder Society-Sponsored Revision of the Unified Parkinson's Disease Rating Scale (MDS-UPDRS): Scale presentation and clinimetric testing results. *Mov Disord* 2008; 23(15): 2129-70 .
40. Tomlinson CL, Stowe R, Patel S, Rick C, Gray R, Clarke CE. Systematic review of levodopa dose equivalency reporting in Parkinson's disease. *Mov Disord* 2010; 25(15): 2649-53
41. Beck AT, Steer RA, Brown GK. Manual for the Beck depression inventory-II. *San Antonio, TX Psychol Corp* 1996; 4: 561-571
42. Marin RS, Biedrzycki RC, Firinciogullari S. Reliability and validity of the apathy evaluation scale. *Psychiatry Res* 1991; 38(2): 143-62

- 1  
2  
3 43. Leentjens AFG, Dujardin K, Pontone GM, Starkstein SE, Weintraub D, Martinez-Martin P. The Parkinson anxiety scale (PAS): Development and validation of a new anxiety scale. *Mov Disord* 2014; 29(8): 1035-1043
- 4  
5  
6 44. Voss T, Bahr D, Cummings J, Mills R, Ravina B, Williams H. Performance of a shortened Scale for Assessment of Positive Symptoms for Parkinson's disease psychosis. *Park Relat Disord* 2013; 19(3): 295-9
- 7  
8  
9 45. Weintraub D, Mamikonyan E, Papay K, Shea JA, Xie SX, Siderowf A. Questionnaire for impulsive-compulsive disorders in Parkinson's Disease-Rating Scale. *Mov Disord* 2012; 27(2): 242-7
- 10  
11 46. Van Dijk KD, Bidinosti M, Weiss A, Raijmakers P, Berendse HW, van de Berg WDJ. Reduced  $\alpha$ -synuclein levels in cerebrospinal fluid in Parkinson's disease are unrelated to clinical and imaging measures of disease severity. *Eur J Neurol* 2014; 21(3): 388-94
- 12  
13  
14 47. Berendse HW, Roos DS, Raijmakers P, Doty RL. Motor and non-motor correlates of olfactory dysfunction in Parkinson's disease. *J Neurol Sci* 2011; 310(1-2): 24-4
- 15  
16  
17 48. Marinus J, Visser M, Van Hilten JJ, Lammers GJ, Stiggelbout AM. Assessment of sleep and sleepiness in parkinson disease. *Sleep* 2003; 26(8): 1049-1054
- 18  
19  
20 49. Jonasson C, Wernersson B, Hoff DAL, Hatlebakk JG. Validation of the GerdQ questionnaire for the diagnosis of gastro-oesophageal reflux disease. *Aliment Pharmacol Ther* 2013; 37(5): 564-72
- 21  
22  
23 50. Schiffman E, Ohrbach R, Truelove E, et al. Diagnostic Criteria for Temporomandibular Disorders (DC/TMD) for Clinical and Research Applications: Recommendations of the International RDC/TMD Consortium Network\* and Orofacial Pain Special Interest Group†. *J Oral Facial Pain Headache* 2014; 28(1): 6-27
- 24  
25  
26 51. Von Korff M, Ormel J, Keefe FJ, Dworkin SF. Grading the severity of chronic pain. *Pain* 1992; 50(2): 133-149
- 27  
28  
29 52. Chung F, Abdullah HR, Liao P. STOP-bang questionnaire a practical approach to screen for obstructive sleep apnea. *Chest* 2016; 149(3): 631-638
- 30  
31  
32 53. Wetselaar P, Lobbezoo F. The tooth wear evaluation system: A modular clinical guideline for the diagnosis and management planning of worn dentitions. *J Oral Rehabil* 2016; 43(1): 69-80
- 33  
34  
35 54. Das P, Challacombe SJ. Dry Mouth and Clinical Oral Dryness Scoring Systems. *Prim Dent J* 2016; 5(1): 77-79
- 36  
37  
38 55. Visscher CM, Naeije M, De Laat A, et al. Diagnostic accuracy of temporomandibular disorder pain tests: a multicenter study. *J Orofac Pain* 2009; 23(2): 108-114
- 39  
40  
41 56. Maldupa I, Brinkmane A, Mihailova A. Comparative analysis of CRT buffer, GC saliva check buffer tests and laboratory titration to evaluate saliva buffering capacity. *Stomatologija* 2011; 13(2): 55-61
- 42  
43  
44 57. Bracci A, Djukic G, Favero L, Salmaso L, Guarda-Nardini L, Manfredini D. Frequency of awake bruxism behaviours in the natural environment. A 7-day, multiple-point observation of real-time report in healthy young adults. *J Oral Rehabil* 2018; 45(6): 423-429
- 45  
46  
47 58. Yachida W, Arima T, Castrillon EE, Baad-Hansen L, Ohata N, Svensson P. Diagnostic validity of self-reported measures of sleep bruxism using an ambulatory single-channel EMG device. *J Prosthodont Res* 2016; 60(4): 250-257
- 48  
49  
50 59. Stuginski-Barbosa J, Porporatti AL, Costa YM, Svensson P, Conti PCR. Diagnostic validity of the use of a portable single-channel electromyography device for sleep bruxism. *Sleep Breath* 2016; 20(2): 695-702
- 51  
52  
53 60. Manfredini D, Winocur E, Guarda-Nardini L, Paesani D, Lobbezoo F. Epidemiology of Bruxism in Adults: A Systematic Review of the Literature. *J Orofac Pain* 2013; 27(2): 99-110
- 54  
55  
56 61. Durham J, Newton-John TR ZJ. Temporomandibular disorders. *BMJ* 2015; 350: h1154
- 57  
58  
59 62. L. Naing, T. Winn, B.N. Rusli Practical Issues in Calculating the Sample Size for Prevalence Studies. *Archives of Orofacial Sciences* 2006; 1: 9-14
- 60  
63. Ella B, Ghorayeb I, Burbaud P, Guehl D. Bruxism in Movement Disorders: A Comprehensive Review. *J Prosthodont* 2017; 26(7): 599-605

- 1  
2  
3 64. Manfredini, D., Ahlberg, J., Wetselaar, P., Svensson, P., & Lobbezoo, F. (2019). The bruxism construct: From cut-off  
4 points to a continuum spectrum. *J Oral Rehabil*, 46(11), 991-997  
5  
6 65. Raphael, K. G., Santiago, V., & Lobbezoo, F. (2016). Is bruxism a disorder or a behaviour? Rethinking the  
7 international consensus on defining and grading of bruxism. *J Oral Rehabil*, 43(10), 791-798.  
8  
9 66. Goldstein RE, Auclair Clark W. The clinical management of awake bruxism. *J Am Dent Assoc* 2017; 148(6): 387-391  
10  
11 67. Kawakami S, Kumazaki Y, Manda Y, Oki K, Minagi S. Specific diurnal EMG activity pattern observed in occlusal  
12 collapse patients: Relationship between diurnal bruxism and tooth loss progression. *PLoS One* 2014; 9(7): e101882  
13  
14 68. Lobbezoo F. Taking up challenges at the interface of wear and tear. *J Dent Res*. 2007 Feb;86(2):101-3. 42.

## Figure Legends

27  
28 Figure 1. Visualization of the possible interactions between the different research variables. *Parkinson's Disease (PD)* is  
29 associated with bruxism through different variables: the dopaminergic system (pathophysiology) plays a role in both  
30 conditions; the prodromal phase of PD (RBD) shows the same characteristics during sleep as does bruxism; sleep  
31 disturbances lead to micro-arousals that can lead to bruxism; dopaminergic medication (levodopa) can influence bruxism;  
32 depression is one of the risk factors for bruxism and is more prevalent in patients with PD; and finally, both PD and bruxism  
33 are regulated centrally and not peripherally. PD is also associated with TMD: PD patients experience pain in the entire body  
34 (i.e., widespread pain), which is a risk factor for TMD pain; also, musculoskeletal pain (as in TMD pain) is frequently present;  
35 and finally, alterations in the striatal dopaminergic system (D1/D2 ratio) could play a role in TMD pain. Bruxism itself is a  
36 risk factor for TMD pain and vice versa. Besides, tooth wear can be a consequence of bruxism. When bruxism occurs, saliva  
37 can be increased, which can be a protective factor for tooth wear. Also, saliva can be changed due to PD medication.  
38 Finally, several exogenic, psychogenic, and physiologic factors can be a risk for bruxism.

41  
42 Figure 2. Flowchart of the study in which a distinction was made between the attendance of participants at the hospital and  
43 the study components at the participant's home. The intake and first survey is part of the regular care at the hospital, and  
44 only followed by an additional MRI and/or DAT-SPECT scan when indicated (dashed line). When patients are eligible and  
45 consent to participate (screening by phone), the additional data are collected after the intake. First, a questionnaire is filled  
46 in by the participants. After that, the participant is invited for the clinical examination. When questionnaires/screenings  
47 that are part of the regular care were filled in  $\geq 1$  year ago, participants will be asked to repeat this procedure  
48 simultaneously with the additional questionnaire and/or clinical examination. Finally, participants will sleep for 5 complete  
49 registration nights with the GrindCare for the assessment of sleep bruxism (when exclusion criterion 2 was not met) and use  
50 the BruxApp for 5 complete registration days for the assessment of awake bruxism (when exclusion criterion 3 was not  
51 met).

57  
58 Figure 3. Flowchart of the data-analysis related to the first secondary aim: "to investigate which factors are influencing the  
59 presence of probable awake/sleep bruxism, TMD pain and the frequency of definite awake/sleep bruxism". All variables will  
60 be tested individually to see whether an association with the dependent variable (awake and sleep bruxism and TMD pain)

1  
2  
3 *exists, and to see how strong this association is (step 1). This dataset will be analysed for both probable bruxism and TMD*  
4 *pain with the use of logistic regression analyses. For definite bruxism, a linear regression analysis will be used (step 2). The*  
5 *forward selection procedure will be used for the (strongest) independent variables until all variables in this regression model*  
6 *show a P-value <0.05 (step 2). In both step 1 and step 2, a distinction will be made between sleep and awake bruxism.*  
7  
8  
9  
10  
11  
12  
13  
14  
15  
16  
17  
18  
19  
20  
21  
22  
23  
24  
25  
26  
27  
28  
29  
30  
31  
32  
33  
34  
35  
36  
37  
38  
39  
40  
41  
42  
43  
44  
45  
46  
47  
48  
49  
50  
51  
52  
53  
54  
55  
56  
57  
58  
59  
60

For peer review only

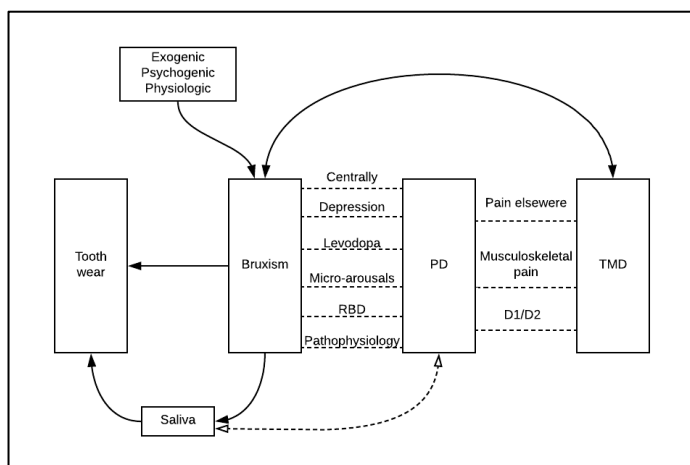

Figure 1. Visualization of the possible interactions between the different research variables. *Parkinson's Disease (PD)* is associated with bruxism through different variables: the dopaminergic system (pathophysiology) plays a role in both conditions; the prodromal phase of PD (RBD) shows the same characteristics during sleep as does bruxism; sleep disturbances lead to micro-arousals that can lead to bruxism; dopaminergic medication (levodopa) can influence bruxism; depression is one of the risk factors for bruxism and is more prevalent in patients with PD; and finally, both PD and bruxism are regulated centrally and not peripherally. PD is also associated with TMD: PD patients experience pain in the entire body (i.e., widespread pain), which is a risk factor for TMD pain; also, musculoskeletal pain (as in TMD pain) is frequently present; and finally, alterations in the striatal dopaminergic system (D1/D2 ratio) could play a role in TMD pain. Bruxism itself is a risk factor for TMD pain and vice versa. Besides, tooth wear can be a consequence of bruxism. When bruxism occurs, saliva can be increased, which can be a protective factor for tooth wear. Also, saliva can be changed due to PD medication. Finally, several exogenic, psychogenic, and physiologic factors can be a risk for bruxism.

view only



Figure 2. Flowchart of the study in which a distinction was made between the attendance of participants at the hospital and the study components at the participant's home. The intake and first survey is part of the regular care at the hospital, and only followed by an additional MRI and/or DAT-SPECT scan when indicated (dashed line). When patients are eligible and consent to participate (screening by phone), the additional data are collected after the intake. First, a questionnaire is filled in by the participants. After that, the participant is invited for the clinical examination. When questionnaires/screenings that are part of the regular care were filled in  $\geq 1$  year ago, participants will be asked to repeat this procedure simultaneously with the additional questionnaire and/or clinical examination. Finally, participants will sleep for 5 complete registration nights with the GrindCare for the assessment of sleep bruxism (when exclusion criterion 2 was not met) and use the BruxApp for 5 complete registration days for the assessment of awake bruxism (when exclusion criterion 3 was not met).



Figure 3. Flowchart of the data-analysis related to the first secondary aim: “to investigate which factors are influencing the presence of probable awake/sleep bruxism, TMD pain and the frequency of definite awake/sleep bruxism”. All variables will be tested individually to see whether an association with the dependent variable (awake and sleep bruxism and TMD pain) exists, and to see how strong this association is (step 1). This dataset will be analysed for both probable bruxism and TMD pain with the use of logistic regression analyses. For definite bruxism, a linear regression analysis will be used (step 2). The forward selection procedure will be used for the (strongest) independent variables until all variables in this regression model show a P-value <0.05 (step 2). In both step 1 and step 2, a distinction will be made between sleep and awake bruxism.



## Appendix 1

All secondary study parameters are listed below, along with a description of the questionnaires/ instruments that will be used for their assessment.

### General disease information:

- Disease severity: see motor symptoms.
- Disease stage: will be established with the Hoehn & Yahr scale. This is a 0 to 5 scale: “asymptomatic (score 0)”, “only unilateral involvement (score 1)”, “bilateral involvement without impairment of balance (score 2)”, “light to mild bilateral involvement, some postural instability and physically independent (score 3)”, “severe disability, still able to walk independent (score 4)”, and “wheelchair or bed bounded without help (score 5)”, in which a higher number means a more developed disease stage<sup>1</sup>.
- Levodopa equivalent daily dosage (LEDD): this is, according to Tomlinson, a “summation of each individual antiparkinsonian drug aligned to 100mg immediate release L-dopa, by means of individual conversion factors”<sup>2,3</sup>.
- Presynaptic dopaminergic loss: will be analysed by means of DAT-SPECT, when applicable.

### Motor symptoms:

- Motor symptoms: will be analysed with the Movement Disorder Society Unified Parkinson Disease Rating Scale III (MDS-UPDRS III)<sup>4</sup>. This involves an examination of motor function, performed by an examiner (e.g., neurologist, trained nurse, or trained research assistant). The patient has to complete 18 motoric tasks. Subsequently, the examiner scores the tasks from 0 till 4: “normal (score 0)”, “slight (score 1)”, “mild (score 2)”, “moderate (score 3)”, and “severe (score 4)” motor problems for that specific part. Finally, a summation of each individual task is established, after that a classification can be made: “mild (score  $\leq$  32)”, “moderate (score 33-58)”, and “severe (score  $\geq$  59)” motor problems<sup>5</sup>.

### Non-motor symptoms:

- Anxiety: will be registered through the Parkinson Anxiety Scale (PAS)<sup>6</sup>. The PAS consists of 3 questionnaires (persistent anxiety, episodic anxiety, and avoidance behavior), with in total 12 questions. There are 5 response options, scored as 0 till 4: “never (score 0)”, “occasionally (score 1)”, “sometimes (score 2)”, “frequently (score 3)”, and “always (score 4)”. Afterwards, 4 groups can be made: “generalized anxiety disorder (score  $\geq$  11 on that subscale)”, “episodic anxiety (score  $\geq$  6 on that subscale)”, “avoidance behavior (score  $\geq$  5 on that subscale)”, and “any anxiety disorder score (score  $\geq$  14)”.
- Apathy: will be measured by means of the apathy evaluation scale (AES)<sup>7</sup>. This scale has 14 statements, with 4 response options: “not at all (score 0)”, “slightly (score 1)”, “somewhat (score 2)”, and “a lot (score 3)”. A total sum score of 42 can be reached. When a higher score is reached, apathy plays a bigger role. The cut off point for “high apathy score” is 14 points.
- Cognitive function: will be analysed by means of the Montreal Cognitive Assessment (MoCA)<sup>8,9</sup> and the Parkinson’s Disease Cognitive Functional Rating Scale, (PD-CFRS)<sup>10,11</sup>. The MoCA is a screening instrument for cognitive dysfunctions on different aspects, such as memory or language, which exist of 11 items in 8 different domains. The examiner (e.g., neurologist, trained nurse, or trained research assistant). scores

each item individually. A sum score of 30 can be reached, wherein a score of 26 or above represents a normal cognitive function and a score above 21 represents a mild cognitive impairment. The PD-CFRS exists of 12 questions with four response options, scored as follows: “No (score 0)”, “Sometimes (score 1)”, “A lot (score 2)” and “not applicable”. All questions answered with “not applicable” will be scored with the mean of all the other questions. A total score of 0-24 can be reached, a higher score means more cognitive problems. The total score will be used.

- **Depression**: will be registered through the Beck Depression Inventory (BDI-II)<sup>12,13,14</sup>. The BDI-II exists of 21 questions with four response options, scored as 0 till 4 (for example: “I do not feel sad”, “I feel sad much of the time”, “I am sad the whole time”, and “I am sad or so unhappy that I can’t stand it”). A maximum of 63 points can be assembled. Afterwards, 4 groups can be made: “none or minimal (score 0-13)”, “light (score 14-19)”, “moderate (score 20-28)”, and “severe (score 29-63)” depressive symptoms.
- **Impulsive-compulsive behavior**: will be analysed by means of the Questionnaire for Impulsive-Compulsive Disorders in Parkinson's Disease-Rating Scale (QUIP-RS)<sup>15</sup>. This questionnaire has 7 subscales and in total 28 questions, with 5 response options scored 0 till 4: “never (score 0)”, “occasionally (score 1)”, “sometimes (score 2)”, “frequently (score 3)”, and “a lot (score 3)”. For a combined impulse control disorder, 4 subscales are combined. A total sum score of 64 can be reached, a higher score indicating more impulsive-compulsive behavior. When 10 points or above are registered, an impulse control disorder is present.
- **Psychosis**: will be measured by means of Parkinson’s disease-adapted scale for assessment of positive symptoms (SAPS-PD)<sup>16</sup>. This 9-item observer-rated scale is scored from 0 till 5: “none (score 0)”, “possible (score 1)”, “mild (score 2)”, “mediocre (score 3)”, “explicit (score 4)”, and “severe (score 5)”, including a part about hallucinations and a part about disillusions. A higher sum score means a probable presence of psychosis. The total score will be used.
- **Quality of sleep**: is analysed by means of two types of questionnaires that are used in this study to assess this construct. The STOP-BANG-NL<sup>17</sup> questionnaire that screens for the risk for moderate to severe obstructive sleep apnea (OSA), and the Scales for Outcomes PD Sleep (SCOPA-sleep)<sup>18</sup> that screens for quality of sleep during the night and sleepiness during the day. The STOP-BANG-NL consists of 8 questions, with 2 response options: yes (score 1) and no (score 0). The total score ranges from 0-8, a classification can be made: “low risk for OSA (score < 3)”, “intermediate risk (score 3-4)” and “severe risk for OSA (≥ 5)”<sup>17</sup>. The SCOPA-Sleep questionnaire consists of 6 questions about daytime sleepiness, with 4 response options scored from 0 till 3: “never (score 0)”, “sometimes (score 1)”, “frequently (score 2)”, and “a lot (score 3)”, and 5 questions about night time sleep, with 4 response options scored from 0 till 3: “not at all (score 0)”, “somewhat (score 1)”, “quite (score 2)”, and “a lot (score 3)”. A higher score means more daytime sleepiness and/or more nighttime sleep problems.

#### **Oral health and dysfunction:**

- **Reflux**: will be analysed with the Gastroesophageal Reflux Disease Questionnaire (GERD-Q NL)<sup>19</sup>. This is a self-administered questionnaire with 4 graded Likert scales scored from 0-3 for predictors of GERD, and 2

reverse Likert scales scored from 3-0 for negative predictors of GERD. The response options are as follows: "0 days (score 0 or 3)", "1 day (score 1 or 2)", "2-3 days (score 2 or 1)", and "4-7 days (score 3 or 0)" dependent on a (reverse) likert scale. When a score of  $\geq 8$  is reached, there is a suspicion for GERD.

- Saliva: based on the Saliva Check Buffer© (GC EUROPE N.V), the quantity and quality (pH and buffer capacity) of saliva will be screened<sup>20</sup>. The buffer capacity stands for the capability of saliva to neutralize the environment of the mouth. Both saliva in rest and saliva that is stimulated during chewing will be investigated. An overview of the normal values is given in appendix 3. Additionally, in the clinical examination, a dry mouth screening by means of the Clinical Oral Dryness Score (CODS) will be performed, which includes a 10-item observer-rated dichotomous outcome questionnaire: "present (score 1)" and "absent (score 0)". When a summation is performed, the following cut-off points are applicable: "mild dryness (score 0-3)", "moderate dryness (score 4-6)", and "severe dryness (score >6)".
- TMD-pain intensity: will be analysed with the use of the Graded Chronic Pain Scale (GCPS)<sup>21</sup>. This is a 7-item questionnaire. Six items have an ordinal scale from 0 till 10, in which 0 stands for "no pain" and 10 for "the worst pain ever". Additionally, the amount of days that where disabling because of the pain in the last 30 days are noted. When scoring, 5 classifications can be made: "no pain (grade 0)", "low disability, low intensity (grade 1)", "low disability, high intensity (grade 2)", "high disability, moderately limiting (grade 3)", and "high disability-severely limiting (grade 4)".
- Tooth Wear: will be analysed with the screening module of the Tooth Wear Screening Index (TWES)<sup>22</sup> that quantifies the amount of tooth wear in 6 sextants of the mouth (right side, front, and left side of the upper jaw and the lower jaw) from 0 till 4: "no wear (score 0)", "visible wear within the enamel (score 1)", "visible wear with dentin exposure and loss of clinical crown height of  $\leq 1/3$  (score 2)", "loss of crown height  $>1/3$  but  $<2/3$  (score 3)" and "loss of crown height  $\geq 2/3$  (score 4)"<sup>23</sup>. Additionally, the palatal side of the upper front is also graded from 0 till 2: "no tooth wear (score 0)", "tooth wear confined to the enamel (score 1)", and "tooth wear with dentin exposure (score 2)". All numbers are scored per tooth and are not summed. The highest number will be used for analysis.

#### Miscellaneous:

- Lifestyle factors (smoking, alcohol, drugs): will be gathered by means of self-report in the standard-care questionnaire of the VUmc. Use of alcohol is noted as units per week. In case of smoking and use of drugs will be both quantified as a nominal variable (participants do (not) smoke and/or use drugs).
- Quality of life: will be analysed with the Parkinson's Disease Questionnaire – 8 (PDQ-8)<sup>24</sup>, by means of 8 questions about quality of life regarding PD. Participants can answer at an ordinal 5-item scale, with scores from 0 till 4: "Never (score 0)", "Occasionally (score 1)", "Sometimes (score 2)", "Often (score 3)", and "Always (score 4)". A score from 0 till 32 can be reached. When a higher score is applicable, poor health-related quality of life is present. The total score will be used.
- Somatic symptoms: will be analysed with the Patient Health Questionnaire – 15 (PHQ15)<sup>25</sup>. Severity of somatization is evaluated by means of 13 questions about somatic symptoms divided in 3 subscales, with scores 0 till 2: "not at all (score 0)", "bothered a little (score 1)", and "bothered a lot (score 2)". Additionally, two questions about sleep and tiredness are present, which are also divided in 3 subscales

with scores 0 till 2: “not at all (score 0)”, “several days (score 1)”, and “more than half of the days/nearly every day (score 2)”. Scores of 0, 5, and 15 are the cut-off points for “low”, “median”, and “high somatic symptom severity”, respectively.

## Appendix 2

The following formula was used for the sample size calculation:

$$n = (Z^2P(1-P))/d^2$$

Z = Z statistic for a level of confidence

P = expected prevalence or proportion (in proportion of one)

d = precision

For the level of confidence of 95%, Z value is 1.96.

With an assumed prevalence of 46% (WB according pilot study), P is 0.46

With a precision of +/-5 percentage points (0.05), d should be set at 0.05.

The numbers for the secondary aims are obtained when reaching the sample size for the primary aim. The approach for the sample size calculation of the secondary aims are as follows:

Since no clinical data of the variables that will be studied are available yet in a population with PD, an effect size is not known for our outcome measures. Nevertheless, in a recent questionnaire-based study, an association between PD on the one hand and bruxism and TMD pain on the other was reported<sup>26</sup>. The prevalence found for these outcome measures were 46.0%, 24.3%, and 29.5% for awake bruxism, sleep bruxism, and TMD pain, respectively. In the current study, a total of 6 independent categorized variables (see Table 4) will be analysed to determine if they are associated with the presence of probable and definite bruxism and/or TMD pain in patients with PD, by means of logistic and linear regression analyses (see statistical approach). We assume that only four predictors will be eligible for multivariate analysis, because (i) only predictors with the strongest associations are included, and (ii) predictors will drop out due to their probable association with each other. The literature about numbers of observations in participants per variable (events) in a logistic regression analysis indicated that for each predictor in a regression analysis, data from 10-20 events is needed<sup>27</sup>. Consequently, 15 events are chosen and thus (4x15=) 60 events are needed. Based on the prevalence of the recent questionnaire-based pilot study<sup>26</sup>, a minimum of 130 participants (60 events/0.46 (= prevalence of awake bruxism)) and a maximum of 246 participants (60 events/0.243 (=prevalence of sleep bruxism)) are needed<sup>26</sup>. For the linear regression, this estimate of the sample size is sufficient to detect medium and large effect sizes<sup>28</sup>. Because this is a wide range, an interim analysis will be done after the inclusion of at least 130 participants or a maximum of 6 months.

### Appendix 3

Cut off points for Saliva Check Buffer (GC EUROPE N.V), to determine whether the quantity and composition of saliva deviate from normal values.

| <u>Saliva type</u> | <u>Volume (ml)</u> | <u>interpretation</u> | <u>pH</u>  | <u>interpretation</u> | <u>Buffercapacity</u> | <u>Interpretation</u> |
|--------------------|--------------------|-----------------------|------------|-----------------------|-----------------------|-----------------------|
| During rest        | 1. >0.50           | 1. Hypersalivation    | 1. >7.5    | 1. Abnormal           | 1. 10-12              | 1. Normal/high        |
|                    | 2. 0.50-0.25       | 2. Normal             | 2. 7.5-6.8 | 2. Normal             | 2. 6-9                | 2. Low                |
|                    | 3. 0.24-0.10       | 3. Risk               | 3. 6.7-6.5 | 3. Risk               | 3. 0.5                | 3. Very low           |
|                    | 4. <0.10           | 4. Pathologic         | 4. <6.5    | 4. Pathologic         |                       |                       |
| During chewing     | 1. >2.00           | 1. Hypersalivation    | 1. >8.0    | 1. Abnormal           | 1. 10-12              | 1. Normal/high        |
|                    | 2. 2.00-0.75       | 2. Normal             | 2. 8.0-7.0 | 2. Normal             | 2. 6-9                | 2. Low                |
|                    | 3. 0.74-0.50       | 3. Risk               | 3. 6.9-6.5 | 3. Risk               | 3. 0-5                | 3. Very low           |
|                    | 4. <0.50           | 4. Pathologic         | 4. <6.5    | 4. Pathologic         |                       |                       |

## References

1. Hoehn MM, Yahr MD. Parkinsonism : onset, progression, and mortality Parkinsonism: onset, progression, and mortality. *Neurology* 1967; 17(5): 427-42
2. Tomlinson CL, Stowe R, Patel S, Rick C, Gray R, Clarke CE. Systematic review of levodopa dose equivalency reporting in Parkinson's disease. *Mov Disord* 2010; 25(15): 2649-53
3. Olde Dubbelink KTE, Stoffers D, Deijen JB, Twisk JWR, Stam CJ, Berendse HW. Cognitive decline in Parkinson's disease is associated with slowing of resting-state brain activity: A longitudinal study. *Neurobiol Aging* 2013; 34(2): 408-18
4. Goetz CG, Tilley BC, Shaftman SR, et al. Movement Disorder Society-Sponsored Revision of the Unified Parkinson's Disease Rating Scale (MDS-UPDRS): Scale presentation and clinimetric testing results. *Mov Disord* 2008; 23(15): 2129-70 .
5. Martínez-Martín P, Rodríguez-Blázquez C, Alvarez M, et al. Parkinson's disease severity levels and MDS-Unified Parkinson's Disease Rating Scale. *Park Relat Disord* 2015; 21(1): 50-4
6. Leentjens AFG, Dujardin K, Pontone GM, Starkstein SE, Weintraub D, Martinez-Martin P. The Parkinson anxiety scale (PAS): Development and validation of a new anxiety scale. *Mov Disord* 2014; 29(8): 1035-1043
7. Marin RS, Biedrzycki RC, Firinciogullari S. Reliability and validity of the apathy evaluation scale. *Psychiatry Res* 1991; 38(2): 143-62
8. Nasreddine ZS, Phillips NA, Bédirian V, et al. The Montreal Cognitive Assessment, MoCA: A brief screening tool for mild cognitive impairment. *J Am Geriatr Soc* 2005; 53(4): 695-9
9. Thissen AJAM, van Bergen F, de Jonghe JFM, Kessels RPC, Dautzenberg PLJ. Applicability and validity of the Dutch version of the Montreal Cognitive Assessment (moCA-d) in diagnosing MCI. *Tijdschr Gerontol Geriatr* 2010; 41(6): 231-40
10. Kulisevsky J, Fernández de Bobadilla R, Pagonabarraga J, et al. Measuring functional impact of cognitive impairment: validation of the Parkinson's disease cognitive functional rating scale. *Parkinsonism Relat Disord* 2013; 19(9): 812-7
11. Ruzafa-Valiente E, Fernández-Bobadilla R, García-Sánchez C, Pagonabarraga J, Martínez-Horta S, Kulisevsky J. Parkinson's Disease - Cognitive Functional Rating Scale across different conditions and degrees of cognitive impairment. *J Neurol Sci* 2016; 361: 66-71
12. Beck AT, Steer RA, Brown GK. Manual for the Beck depression inventory-II. *San Antonio, TX Psychol Corp* 1996; 4: 561-571
13. Beck A, Ward C, Mendelson M, Mock J, Erbaugh J. An inventory for measuring depression. *Arch Gen Psychiatry* 1961; 4: 561-571
14. Bouman TK, Luteijn F, Albersnagel FA, der Ploeg Van. Enige ervaringen met de Beck depression inventory (BDI). *Gedrag Tijdschr voor Psychol* 1985; 13(2): 13-24
15. Voss T, Bahr D, Cummings J, Mills R, Ravina B, Williams H. Performance of a shortened Scale for Assessment of Positive Symptoms for Parkinson's disease psychosis. *Park Relat Disord* 2013; 19(3): 295-9
16. Fernandez HH, Aarsland D, Fénelon G, et al. Scales to assess psychosis in Parkinson's disease: Critique and recommendations. *Mov Disord* 2008; 23(4): 484-500
17. Chung F, Abdullah HR, Liao P. STOP-bang questionnaire a practical approach to screen for obstructive sleep apnea. *Chest* 2016; 149(3): 631-638
18. Marinus J, Visser M, Van Hilten JJ, Lammers GJ, Stiggelbout AM. Assessment of sleep and sleepiness in parkinson disease. *Sleep* 2003; 26(8): 1049-1054
19. Jonasson C, Wernersson B, Hoff DAL, Hatlebakk JG. Validation of the GerdQ questionnaire for the diagnosis of gastro-oesophageal reflux disease. *Aliment Pharmacol Ther* 2013; 37(5): 564-72

- 1  
2  
3 20. Maldupa I, Brinkmane A, Mihailova A. Comparative analysis of CRT buffer, GC saliva check buffer tests and  
4 laboratory titration to evaluate saliva buffering capacity. *Stomatologija* 2011; 13(2): 55-61  
5  
6 21. Von Korff M, Ormel J, Keefe FJ, Dworkin SF. Grading the severity of chronic pain. *Pain* 1992; 50(2): 133-149  
7  
8 22. Wetselaar P, Lobbezoo F. The tooth wear evaluation system: A modular clinical guideline for the diagnosis and  
9 management planning of worn dentitions. *J Oral Rehabil* 2016; 43(1): 69-80  
10  
11 23. Lobbezoo F, Naeije M. A reliability study of clinical tooth wear measurements. *J Prosthet Dent* 2001; 86(6):597-602  
12  
13 24. Jenkinson C, Fitzpatrick R, Peto V, Greenhall R, Hyman N. The PDQ-8: Development and validation of a short-form  
14 Parkinson's disease questionnaire. *Psychol Heal* 1997; 12(6): 805-814  
15  
16 25. Kroenke K, Spitzer RL, Williams JBW. The PHQ-15: Validity of a new measure for evaluating the severity of somatic  
17 symptoms. *Psychosom Med* 2002; 64(2):258-66  
18  
19 26. Verhoeff MC, Lobbezoo F, Wetselaar P, Aarab G, Koutris M. Parkinson's disease, temporomandibular disorders and  
20 bruxism: A pilot study. *J Oral Rehabil* 2018; 45(11): 854-863  
21  
22 27. Peduzzi P, Concato J, Kemper E, Holford TR, Feinstein AR. A simulation study of the number of events per variable  
23 in logistic regression analysis. *J Clin Epidemiol* 1996; 49(12): 1373-9  
24  
25 28. Field AP. *Discovering Statistics Using IBM SPSS Statistics: North American, 5th Edition*; 2017.  
26  
27  
28  
29  
30  
31  
32  
33  
34  
35  
36  
37  
38  
39  
40  
41  
42  
43  
44  
45  
46  
47  
48  
49  
50  
51  
52  
53  
54  
55  
56  
57  
58  
59  
60

# BMJ Open

## Parkinson's disease, temporomandibular disorder pain, and bruxism and its clinical consequences. A protocol of a single-centre observational outpatient study

|                                 |                                                                                                                                                                                                                                                                                                     |
|---------------------------------|-----------------------------------------------------------------------------------------------------------------------------------------------------------------------------------------------------------------------------------------------------------------------------------------------------|
| Journal:                        | <i>BMJ Open</i>                                                                                                                                                                                                                                                                                     |
| Manuscript ID                   | bmjopen-2021-052329.R3                                                                                                                                                                                                                                                                              |
| Article Type:                   | Protocol                                                                                                                                                                                                                                                                                            |
| Date Submitted by the Author:   | 07-Mar-2022                                                                                                                                                                                                                                                                                         |
| Complete List of Authors:       | Verhoeff, Merel; ACTA, Orofacial Pain and Dysfunction<br>Koutris, Michail; ACTA, Orofacial Pain and Dysfunction<br>Berendse, Henk; Amsterdam University Medical Centres<br>Dijk van, Karin; Epilepsy Netherlands Foundation Sleep-Wake Centre<br>Lobbezoo, F.; ACTA, Orofacial Pain and Dysfunction |
| <b>Primary Subject Heading</b>: | Dentistry and oral medicine                                                                                                                                                                                                                                                                         |
| Secondary Subject Heading:      | Dentistry and oral medicine, Neurology, Geriatric medicine                                                                                                                                                                                                                                          |
| Keywords:                       | Parkinson-s disease < NEUROLOGY, EPIDEMIOLOGY, Motor neurone disease < NEUROLOGY, ORAL MEDICINE                                                                                                                                                                                                     |
|                                 |                                                                                                                                                                                                                                                                                                     |

SCHOLARONE™  
Manuscripts



# Parkinson's disease, temporomandibular disorder pain, and bruxism and its clinical consequences. A protocol of a single-centre observational outpatient study

---

M.C. Verhoeff, DDS, MSc<sup>1</sup> – M.C.Verhoeff@acta.nl  
M. Koutris, DDS, PhD<sup>1</sup> – M.Koutris@acta.nl  
H.W. Berendse, MD, PhD<sup>2</sup> – H.Berendse@amsterdamumc.nl  
K.D. van Dijk, MD, PhD<sup>2,3</sup> – [Kvdijk@sein.nl](mailto:Kvdijk@sein.nl)  
F. Lobbezoo, DDS, PhD<sup>1</sup> – F.Lobbezoo@acta.nl

<sup>1</sup>Department Orofacial Pain and Dysfunction, Academic Centre for Dentistry Amsterdam (ACTA), University of Amsterdam and Vrije Universiteit Amsterdam, Gustav Mahlerlaan 3004, 1081 LA Amsterdam, The Netherlands

<sup>2</sup>Amsterdam University Medical Centres, Vrije Universiteit Amsterdam, Neurology, Amsterdam Neuroscience, De Boelelaan 1117, 1081 HV Amsterdam, The Netherlands

<sup>3</sup>Sleep Wake Centre, Stichting Epilepsie Instellingen Nederland (SEIN), Achterweg 2, 2103 SW Heemstede, The Netherlands

## Corresponding author:

M.C. Verhoeff  
Gustav Mahlerlaan 3004  
1081 LA Amsterdam  
M.C.Verhoeff@acta.nl

## Abstract

**Introduction:** A recent questionnaire-based study suggested that bruxism and painful temporomandibular disorders (TMD pain) may be more prevalent in Parkinson's disease (PD) patients compared to controls. The presence of both bruxism and TMD pain may negatively influence patients' quality of life. The present study is designed to clinically and more objectively investigate the presence of bruxism and TMD pain in PD patients. The secondary aim of the study is to identify factors associated with bruxism and TMD pain in PD patients, such as disease severity and dopaminergic medication usage. Furthermore, the presence of tooth wear in PD patients will be studied as this can be a major consequence of bruxism. Finally, deviations in saliva composition that may contribute to tooth wear will be studied.

**Methods and analysis:** This is a single-centre observational outpatient study at the Amsterdam University Medical Centres, location VUmc. All patients with a clinical diagnosis of PD will be eligible for inclusion. Participants will fill in a set of questionnaires. Subsequently, patients will be examined clinically for, amongst others, TMD pain, presence and severity of tooth wear, and deviations in saliva composition. Sleep-time registrations will take place for 5 nights with the GrindCare<sup>®</sup> GC4 (i.e., a portable, single-channel electromyographic recorder) to assess sleep bruxism and simultaneously by the use of the BruxApp for 5 days to assess awake bruxism. We will partly use data collected during standard clinical care, to minimize patient burden.

**Ethics and dissemination:** The scientific and ethical aspects of this study protocol have been approved by the Medical Ethics Review Committee of the Amsterdam UMC, location VUmc; NL. 2019.143). Informed consent will be obtained from all participants. The results will be published in a peer-reviewed journal, if relevant presented at conferences, and published as part of a Ph.D. thesis.

**Trial registration:** NL8307

**Keywords:** Parkinson's Disease; Temporomandibular Disorders; Bruxism; Tooth wear; Saliva; Protocol

**Strengths and limitations of this study:**

- 1  
2  
3 50 - This observational study will provide accurate data on the presence of painful temporomandibular  
4 51 disorders and bruxism in Parkinson patients attending the outpatient clinic for movement disorders of  
5 52 Amsterdam UMC, location VUmc, and their possible associated factors like disease severity and  
6 53 medication usage.  
7 54 - Novel information about tooth wear and saliva composition and quantity in patients with Parkinson's  
8 55 disease will be collected.  
9 56 - Since polysomnographic recordings for the assessment of definite sleep bruxism are not feasible in this  
10 57 study, a portable, single-channel electromyographic recorder is used instead.  
11 58 - Electromyographic recordings will be performed for several nights in a row, thus taking into account the  
12 59 fluctuating nature of sleep bruxism.  
13 60 - Because of the absence of a control group, no direct comparisons between individuals with PD and similar  
14 61 individuals without PD can be made.  
15 62  
16  
17  
18  
19

## 63 Introduction

64 Parkinson's disease (PD) is a neurodegenerative movement disorder characterized by motor symptoms, in  
65 particular rigidity, bradykinesia, and tremor<sup>1,2</sup>. Patients with PD do not solely experience motor symptoms, but  
66 also non-motor symptoms like anxiety, depression, sleep problems, and cognitive dysfunction<sup>3,4</sup>. Besides, pain  
67 has been reported as one of the most troublesome non-motor symptoms in PD patients, early in their  
68 disease, which could affect patients' quality of life<sup>5,6</sup>.

69  
70 Due to global ageing, the prevalence of PD is estimated to increase significantly in the near future. Ageing is  
71 associated with oral health-related issues, which may therefore occur more frequently in the near future as  
72 well<sup>7</sup>. Dentists regularly see patients with bruxism in the dental office, which is an oral health-related issue  
73 that is not necessarily associated with systemic diseases. Bruxism is currently defined as "a repetitive jaw-  
74 muscle activity characterized by clenching or grinding of the teeth and/or by bracing or thrusting of the  
75 mandible"<sup>8</sup>. It can occur during sleep, indicated as sleep bruxism, or during wakefulness, indicated as awake  
76 bruxism<sup>8</sup>. Not only bruxism itself, but also its possible consequences, such as mechanical tooth wear and  
77 temporomandibular disorders (TMD), have hardly been studied in patients with PD. TMD is a collective term  
78 embracing disorders of the temporomandibular joint, masticatory muscles, and adjacent anatomical  
79 structures<sup>9</sup>. TMD can present as painful and non-painful conditions. Patients with TMD can report, for  
80 example, orofacial pain (including headache), limitations in the movement of the mandible, and joint noises<sup>9</sup>.  
81 Both tooth wear and TMD may affect the oral health-related quality of life<sup>10</sup>.

82  
83 In a population with PD patients, oral health was recently studied<sup>11</sup>. It was shown that the oral health in PD  
84 patients is deteriorated as compared to their peers without PD. Besides, medication usage can influence  
85 salivation production, which in turn influences the oral environment<sup>12</sup>. Also, gastrointestinal problems are  
86 more frequently shown in patients with PD. In turn, this could influence the presence of tooth wear due to  
87 reflux<sup>13,14</sup>.

88

1  
2  
3 89 While oral health in PD has not been studied widely<sup>11</sup>, oral (dys-)function in PD has been studied even less,  
4 90 even though PD, bruxism, and TMD have been suggested to share several common characteristics (see Figure  
5 91 1). Similar to PD, bruxism is considered to be regulated centrally and not peripherally<sup>15</sup>. In addition, in the  
6 92 pathophysiology of both PD and bruxism, the brain dopamine system plays an important role<sup>16-18</sup>. Besides,  
7 93 sleep disturbances<sup>19</sup> that are present both in PD<sup>20</sup> and in sleep bruxism, are associated with arousal  
8 94 activity<sup>19,21</sup>. As a result of such arousal activity, sleep bruxism may occur more frequently in people with sleep  
9 95 disturbances than in those without<sup>21</sup>. Also, in the prodromal phase of PD, a higher rhythmic masticatory  
10 96 muscle activity (RMMA) on polysomnography in NREM sleep has been observed, compared to controls<sup>22</sup>. This  
11 97 is a characteristic that is also seen in sleep bruxism patients<sup>23</sup>. Furthermore, bruxism may be considered as a  
12 98 risk factor for TMD, depending on the assessment methods used<sup>24</sup>. TMD itself shares some characteristics with  
13 99 PD. For example, musculoskeletal pain (of which TMD pain is a subtype) is frequently reported by patients with  
14 100 PD<sup>3,25</sup>. Finally, suggestions have been put forward that alterations in the dopaminergic system are also present  
15 101 in patients with pain in the orofacial region<sup>26</sup>, although this remains to be confirmed in patients with TMD  
16 102 pain.

17 103  
18 104 Recently, a questionnaire-based pilot study in 368 patients with PD and 340 controls suggested a higher  
19 105 prevalence of bruxism and TMD pain in patients with PD<sup>27</sup>. Also, PD patients reported a higher mean TMD-pain  
20 106 intensity than controls<sup>27</sup>. Besides, a large Taiwanese study showed a two-fold increased risk of TMD in patients  
21 107 with PD as compared to controls<sup>28</sup>. However, because of the limitations of the described studies (e.g.,  
22 108 questionnaire-based study<sup>27</sup>; no international validated clinical examination used; no detailed explanation of  
23 109 the clinical examination given; and only newly diagnosed TMD-patients included)<sup>28</sup>, extrapolation of these  
24 110 findings requires further verification through clinical and instrumental data. Hence, to overcome some of the  
25 111 limitations, the present protocol was designed. The planned study will acquire more objective clinical and  
26 112 instrumental measures for awake and sleep bruxism and TMD pain, which can give more valid information on  
27 113 outcomes like the presence of bruxism in this population. Also, additional factors, such as the severity of PD  
28 114 and cognitive function, will be included as possible predictors for bruxism and/or TMD pain in PD patients.  
29 115 Knowledge of the factors that can influence bruxism and/or TMD pain in patients with PD will help dentists  
30 116 and other oral health care providers to provide individualised care to prevent and/or alleviate symptoms of  
31 117 bruxism and/or TMD pain and their consequences in this vulnerable group of patients.

32 118  
33 119 Based on the above-summarized evidence, the primary aim of this study is to investigate the presence of  
34 120 bruxism and TMD pain in PD patients, through objective clinical and instrumental measurements. Based on our  
35 121 pilot-study outcomes<sup>27</sup>, we hypothesise that the prevalence of bruxism and TMD pain in the current  
36 122 population will be higher than in their peers without PD, as described in the literature<sup>29,30</sup>.

37 123  
38 124 In addition, the secondary aims and their corresponding hypotheses are the following:

- 1  
2  
3 125 1. To identify which factors are associated with bruxism and TMD pain in PD patients. We hypothesise that  
4 126 factors like medication usage<sup>16</sup>, disease severity<sup>15,17</sup>, psychosocial factors<sup>31-33</sup>, and lifestyle factors<sup>31,32,34</sup> are  
5 127 influencing the studied associations.  
6  
7 128 2. To investigate whether the salivary flow, the pH, and the buffer capacity of saliva in patients with PD are  
8 129 related to the severity of tooth wear. Our hypothesis is that in patients with PD, the saliva composition  
9 130 and salivary flow deviate from normal standards and that this is associated with the severity of tooth  
10 131 wear<sup>14</sup>.  
11  
12 132 3. To investigate with Dopamine Transporter Single Photon Emission Computed Tomography (DAT-SPECT)  
13 133 whether there is a relationship between the degree of presynaptic dopaminergic loss and the presence of  
14 134 bruxism in these patients. The hypothesis is that there is a difference in striatal dopaminergic deficit  
15 135 between PD patients with and without bruxism, in which patients without bruxism show a smaller deficit.  
16  
17  
18  
19  
20 136  
21  
22  
23  
24  
25  
26  
27  
28  
29  
30  
31  
32  
33  
34  
35  
36  
37  
38  
39  
40  
41  
42  
43  
44  
45  
46  
47  
48  
49  
50  
51  
52  
53  
54  
55  
56  
57  
58  
59  
60

## 137 **Methods and analysis**

138 The design of this study is a single-centre observational outpatient study that will take place at the  
 139 Department of Neurology of the Amsterdam University Medical Centres (Amsterdam UMC), location VUmc.  
 140 The data collection will take place for two years. Due to the COVID-19 pandemic, the start date is delayed.  
 141 However, the estimated start and end dates will be January 2023 and January 2025, respectively.

### 143 **Participants and eligibility**

144 Patients already clinically diagnosed with PD or planned for an intake appointment with presumable PD at the  
 145 outpatient clinic for movement disorders of the VUmc, will be eligible to participate in the study. Yearly, about  
 146 100-120 new consultations for PD are seen in the outpatient clinic. In addition, patients already receiving  
 147 treatment at the VUmc are eligible for participation as well. The inclusion and exclusion criteria are listed in  
 148 Table 1.

150 *Table 1. Inclusion and Exclusion criteria. When patients have a pacemaker, they cannot use the GrindCare® GC4 (i.e., a  
 151 portable, single-channel electromyographic recorder to detect sleep bruxism) and will be excluded from that specific part of  
 152 the study. When patients do not have a smartphone, participants cannot use the BruxApp (i.e., an application on a  
 153 smartphone to assess awake bruxism) and will be excluded from that specific part of the study.*

| Inclusion criteria                                                | Exclusion criteria                                              |
|-------------------------------------------------------------------|-----------------------------------------------------------------|
| 1. ≥18 years of age                                               | 1. atypical parkinsonian syndromes                              |
| 2. ≥ 21 on the Montreal Cognitive Assessment (MoCA) <sup>35</sup> | 2. for using the GrindCare: pacemaker                           |
| 3. fulfil clinical diagnostic criteria for PD <sup>36</sup>       | 3. for using the BruxApp: no smartphone                         |
|                                                                   | 4. for the DAT-SPECT: no deep brain stimulation implant present |

### 155 **Study procedure**

156 In Figure 2, the study procedure is visualized. If patients agree to participate in the study, they will be asked to  
 157 sign an informed consent. This study will be performed in parallel to the routine clinical care (see Table 2) at  
 158 the Amsterdam UMC, location VUmc. When questionnaires/screenings were filled in ≥ 1 year ago, participants  
 159 will be asked to repeat this. Specifically, for this study, additional information will be obtained in the form of a  
 160 set of questionnaires that participants can fill in at home and of a clinical examination at the hospital (see  
 161 Table 3). The neurologist will determine whether additional brain imaging (viz., MRI or DAT-SPECT) is  
 162 necessary, mainly in cases of clinical doubt. The estimated percentage of additional brain imaging in newly  
 163 referred patients is 40%.

165 *Table 2. Questionnaires and clinical data collected as part of the regular care at the hospital, which is used in this  
 166 observational study. See Appendix 1 for a description per questionnaire/instrument.*

| Variables standard care hospital                                                                                                                           |
|------------------------------------------------------------------------------------------------------------------------------------------------------------|
| 1. Cognitive function (Montreal Cognitive Assessment, MoCA) <sup>35</sup> ; (Parkinson's Disease Cognitive Functional Rating Scale, PD-CFRS) <sup>37</sup> |
| 2. Disease stage (Hoehn & Yahr) <sup>38</sup> ; Disease severity (Unified Parkinson's Disease Rating Scale – III, UPDRS-III) <sup>39</sup>                 |

|    |                                                                                                                                                                                                                                                                                                                                                                                                                                                  |
|----|--------------------------------------------------------------------------------------------------------------------------------------------------------------------------------------------------------------------------------------------------------------------------------------------------------------------------------------------------------------------------------------------------------------------------------------------------|
| 3. | <b>Dopaminergic medication (Levodopa equivalent daily dose, LEDD)<sup>40</sup></b>                                                                                                                                                                                                                                                                                                                                                               |
| 4. | <b>Neuropsychiatric symptoms: Depression (Beck Depression Inventory-ii, BDI-ii)<sup>41</sup>; Apathy (Apathy evaluation scale, AES)<sup>42</sup>; Anxiety (Parkinson Anxiety Scale, PAS)<sup>43</sup>; Psychotic (Parkinson’s Disease-adapted scale for assessment of positive symptoms, SAPS-PD)<sup>44</sup>; Impulse control (Questionnaire for Impulsive-Compulsive Disorders in Parkinson’s Disease-Rating Scale, QUIP-RS)<sup>45</sup></b> |
| 5. | <b>Presynaptic dopaminergic loss, when applicable (brain imaging) (Dopamine Transporter Single Photon Emission Computed Tomography, DAT-SPECT)<sup>46,47</sup></b>                                                                                                                                                                                                                                                                               |
| 6. | <b>Quality of sleep (Scales for Outcomes PD Sleep, SCOPA-SLEEP)<sup>48</sup></b>                                                                                                                                                                                                                                                                                                                                                                 |
| 7. | <b>Stimulants usage: Alcohol (per unit, daily), Drugs (per unit, daily), Smoking (per unit, daily)</b>                                                                                                                                                                                                                                                                                                                                           |

167  
168  
169

Table 3. Additional research components, i.e., performed in addition to the regular appointments at the hospital. See Appendix 1 for a description per questionnaire/instrument.

| <b>Additional research components</b> |                                                                                                                                                                                                           |
|---------------------------------------|-----------------------------------------------------------------------------------------------------------------------------------------------------------------------------------------------------------|
| <b>Questionnaires</b>                 | 1. Reflux (GerdQ-NL) <sup>49</sup>                                                                                                                                                                        |
|                                       | 2. TMD pain (according to the Diagnostic Criteria for TMD, DC/TMD) <sup>50</sup> and intensity (graded chronic pain scale, GCPS) <sup>51</sup>                                                            |
|                                       | 3. Tooth wear                                                                                                                                                                                             |
|                                       | 4. Sleep (Obstructive Sleep Apnea, STOP-Bang NL) <sup>52</sup>                                                                                                                                            |
| <b>Clinical examination</b>           | 1. Intra-oral examination (positive symptoms of bruxism (viz., clenching marks in the soft tissues of the cheek, tongue or lip, mechanical tooth wear, hypertrophy of the masseter muscle)) <sup>50</sup> |
|                                       | 2. Quantitative tooth wear screening (part of the Tooth Wear Evaluation System, TWES) <sup>53</sup>                                                                                                       |
|                                       | 3. A brief screening of the dental prosthesis (when applicable)                                                                                                                                           |
|                                       | 4. Dry mouth screening (Clinical Oral Dryness Score, CODS) <sup>54</sup>                                                                                                                                  |
|                                       | 5. Jaw-mobility examination (DC/TMD) <sup>50</sup>                                                                                                                                                        |
|                                       | 6. Joint noises examination (DC/TMD) <sup>50</sup>                                                                                                                                                        |
|                                       | 7. Palpation of masticatory muscles and temporomandibular joints (DC/TMD) <sup>50</sup>                                                                                                                   |
|                                       | 8. Dynamic/static tests <sup>55</sup>                                                                                                                                                                     |
|                                       | 9. Bruxoprovocationtest <sup>55</sup>                                                                                                                                                                     |
|                                       | 10. Saliva test (Saliva-Check Buffer®) <sup>56</sup>                                                                                                                                                      |
| <b>Registration</b>                   | 1. BruxApp <sup>57</sup>                                                                                                                                                                                  |
|                                       | 2. GrindCare® GC4 <sup>58,59</sup>                                                                                                                                                                        |

170

**Main study parameters**

171  
172  
173  
174  
175  
176  
177  
178  
179

The main study parameters or endpoints are “presence of bruxism (sleep and/or awake)” as well as “diagnosis of TMD pain”. For the assessment of sleep bruxism, patients will be asked to sleep 5 complete registration nights with a portable, single-channel electromyographic recorder, viz., the GrindCare® GC4 (Sunstar Suisse SA, Etoy, Switzerland)<sup>58,59</sup>. For the assessment of awake bruxism, patients will use, for 5 complete registration days, the BruxApp<sup>57,60</sup>, which is a mobile application for the recording of bruxism activity based on ecological momentary assessment<sup>8</sup>. According to international consensus, a classification of the probability that bruxism is present can be made as follows: possible, probable, and definite bruxism presence<sup>61</sup>. In this research, all probabilities of bruxism presence can be determined, however, the highest probability will be used (viz., both

180 probable and definite). When patients cannot use the GrindCare® GC4 and/or BruxApp, and more certainty  
181 towards a definite presence is thus impossible, probable bruxism presence will be determined with the use of  
182 data from the clinical examination, based on the presence of positive symptoms of bruxism (viz., clenching  
183 marks in the soft tissues of the cheek, tongue, or lip, mechanical tooth wear (attrition), and/or hypertrophy of  
184 the masseter muscle)<sup>61</sup>. Differences in PD symptoms between those who can, and those who cannot complete  
185 the instrumental assessments will be tested as to gain insight into the external validity or generalizability of  
186 the conclusions involving bruxism modeling.

187 The TMD-pain diagnosis will be established according to the Diagnostic Criteria for TMD (DC/TMD)<sup>50</sup>, with the  
188 use of standardized questionnaires and clinical examination procedures. Based on the collected data, the  
189 following diagnoses can be set: myalgia (local myalgia, myofascial pain, myofascial pain with referral),  
190 arthralgia, headache attributed to TMD, and non-painful joint disorders (disc displacement with reduction, disc  
191 displacement with reduction with intermitted locking, disc displacement without reduction with limited mouth  
192 opening, disc displacement without reduction without limited mouth opening, degenerative joint disease,  
193 subluxation). The main focus of this research protocol will be the TMD-pain diagnosis, for the establishment of  
194 which the diagnostic flow chart of the DC/TMD will be used<sup>50</sup>.

195 Dentists making clinical assessments for bruxism or TMDs will be blinded to the results of the instrumental  
196 assessments (i.e., GrindCare® GC4 and BruxApp for sleep bruxism and awake bruxism, respectively).

197

### 198 **Secondary study parameters**

199 To identify which factors are associated with bruxism and TMD pain in PD patients, several variables will be  
200 evaluated (see Tables 2 and 3), using different clinical/instrumental measures (see appendix 1-3). Most of  
201 these variables have already been reported as possible risk factors for bruxism<sup>32</sup> and/or TMD<sup>62</sup> in the general  
202 population<sup>31-33</sup>. However, the variables dopaminergic medication usage and disease stage/severity of PD have  
203 not been studied yet in the association with bruxism or TMD pain in PD patients. Finally, if DAT-SPECT imaging  
204 is available, we will compare the measured presynaptic striatal dopaminergic deficit between participants with  
205 and without bruxism<sup>46</sup>.

206

### 207 **Sample size**

208 According the pilot study, the prevalence of awake bruxism, sleep bruxism, and TMD pain in patients with PD is  
209 46%, 24%, and 29.5%, respectively<sup>23</sup>. Taking the cautious approach, we calculated the sample size for awake  
210 bruxism, sleep bruxism, and TMD pain and chose the largest sample size. Aiming for a precision of 5% with a  
211 level of confidence of 95%, 246 participants are needed<sup>63</sup>. See appendix 2 for the sample size calculation.  
212 Furthermore, the approach to calculate the sample size for the most important secondary aim (viz., to identify  
213 which factors are associated with bruxism and TMD pain in PD patients) is also shown in appendix 2. The  
214 numbers are obtained when reaching the sample size for the primary aim.

215

### 216 **Statistical approach**



217 With the use of descriptive tests, demographic data will be summarised. In Figure 3, it is shown how the  
 218 dataset is analysed to give an answer on which factor is associated with the presence/absence of probable  
 219 bruxism/TMD pain or with the frequency (i.e., the number of bruxism events per hour) of definite bruxism. The  
 220 forward selection procedure will be used for the (strongest) independent variables (see Table 4) until all  
 221 variables in this regression model show a P-value <0.05 (See Step 2, Figure 3). Finally, to analyse if there is an  
 222 association between tooth wear and composition of saliva, Spearman's correlation coefficient will be used. For  
 223 the DAT-SPECT, a semi-quantitative analysis will be used. Ratios for specific versus non-specific binding will be  
 224 calculated for the regions of interest (viz., left and right putamen and caudate nucleus, using the occipital  
 225 cortex as a reference area) and analysed using the independent sample t-test<sup>46,47</sup>.

226

227 *Table 4. The independent variables (categorized) that will be investigated for one of the secondary aims: which factors are*  
 228 *associated with the presence of bruxism and TMD pain in patients with Parkinson's Disease?*

| Independent variables (categorized) |                                                                                                         |
|-------------------------------------|---------------------------------------------------------------------------------------------------------|
| 1.                                  | Bruxism (when analysing which factors are associated with the presence of TMD pain in patients with PD) |
| 2.                                  | Neuropsychiatric symptoms (depression, anxiety, apathy, psychosis, impulse disorders)                   |
| 3.                                  | Parkinson's Disease (disease stage, disease severity, medication usage, cognitive function)             |
| 4.                                  | Sleep (quality of sleep, obstructive sleep apnea)                                                       |
| 5.                                  | Stimulants usage (alcohol, smoking, drugs)                                                              |
| 6.                                  | TMD pain (when analysing which factors are associated with the presence of bruxism in patients with PD) |
| 7.                                  | Tooth Wear related (reflux, saliva, dry mouth)                                                          |

229

### 230 Patient and public involvement

231 Neither patients nor the community were involved in the design of this study. However, feedback from  
 232 participants of the earlier pilot study<sup>23</sup> was used to design this study. Patients with PD will be involved in the  
 233 performance of the study. The burden for the participants will be kept as minimal as possible. On request, the  
 234 outcomes of this study will be disseminated to the participants.

### 235 Discussion

236 The primary aim of this study is to objectively measure the presence of bruxism and TMD pain in a population  
 237 of patients with Parkinson's Disease (PD). Furthermore, the three secondary aims are described as follows: (i)  
 238 to identify which factors are associated with bruxism and TMD pain in PD patients, (ii) to investigate whether  
 239 the salivary flow, the pH, and the buffer capacity of saliva in patients with PD are related to the severity of  
 240 tooth wear, and finally (iii) to investigate with DAT-SPECT whether there is a relationship between the degree  
 241 of presynaptic dopaminergic loss and the presence of bruxism in these patients.

242

243 To the best of our knowledge, this is the first study that attempts to objectively measure the presence of  
 244 awake bruxism, sleep bruxism, and TMD pain in a population of patients with PD. Previous studies investigated  
 245 the prevalence of awake bruxism in this population, however only few participants were included or only  
 246 questionnaires were used<sup>23,64</sup>. When quantifying bruxism with continuous data, recent insights showed a



1  
2  
3 247 better quality of a definite bruxism diagnosis<sup>61</sup>. Nevertheless, we used a dichotomous outcome in this protocol  
4  
5 248 study to answer our first aim, i.e., to investigate the presence of bruxism. Besides, we also included self-report  
6  
7 249 and clinical data, which do not yield continuous outcomes. Despite this, in the present study, the use of the  
8  
9 250 GrindCare® GC4 and the BruxApp can give more certainty towards a definite establishment of sleep and awake  
10  
11 251 bruxism, respectively<sup>61</sup>. This enables the analysis of continuous outcomes, which has been suggested by  
12  
13 252 several authors<sup>65,66</sup>. However, as mentioned earlier, not every participant will be able to use the GrindCare®  
14  
15 253 GC4 and/or the Bruxapp. Therefore, this protocol is designed to include all probability levels for the  
16  
17 254 assessment of bruxism, which contributes to the feasibility of this protocol<sup>61</sup>. Importantly, participants able to  
18  
19 255 complete all assessments may differ from those who cannot complete instrumental assessments due to  
20  
21 256 differences in severity of their PD symptoms. Fine motor problems which occur in PD create barriers for  
22  
23 257 electrode placement and cell phone use as required for instrumental assessments of sleep and awake bruxism.  
24  
25 258 Therefore, we will test for PD symptom differences between subgroups defined by comparing participants  
26  
27 259 completing or not completing instrumental assessments. If differences are found, this will indicate limitations  
28  
29 260 to the external validity or generalizability of conclusions involving bruxism modeling.  
30  
31 261

32  
33 262 In addition, the clinical examination according to the DC/TMD<sup>50</sup> enables setting a valid TMD-pain diagnosis,  
34  
35 263 making a distinction between several TMD complaints, and comparing the outcomes with other (inter-)  
36  
37 264 national research. An important aspect of a TMD-pain diagnosis according to the DC/TMD is that it considers  
38  
39 265 the aspect of “familiar pain” as part of the diagnostic algorithm. As such, PD-related pain characteristics like  
40  
41 266 pain exacerbation due to “wearing off” of dopaminergic medication and lower pain thresholds in individuals  
42  
43 267 living with PD as compared to similar individuals without PD<sup>67</sup>, will be taken into account.  
44  
45 268

46  
47 269 Because PD patients are vulnerable and burdened with frequent visits to multiple caregivers (e.g., their  
48  
49 270 neurologist, physiotherapist, and speech therapist), it is important to burden the participants as minimally as  
50  
51 271 possible. Therefore, during the process of designing this study and collecting the data, a multidisciplinary  
52  
53 272 approach was established between neurologists and dentists to enable an as efficient as possible usage of the  
54  
55 273 patient’s time and energy.  
56  
57 274

58  
59 275 The targeted number of inclusions will be a challenge. However, the calculated sample size is an estimation,  
60  
61 276 because no clinical prevalences are known as yet. Like in otherwise healthy individuals, clenching and grinding  
62  
63 277 are not always recognized by the patients themselves<sup>68,69</sup>, thus the prevalence of sleep bruxism in the pilot  
64  
65 278 study could have been underestimated. This means that the calculated sample size in this study might be  
66  
67 279 higher than eventually required. Therefore, an interim analysis will be performed after 130 included  
68  
69 280 participants or 6 months.  
70  
71 281

72  
73 282 This study has no longitudinal character and therefore, no causal relations can be observed between the (in-)  
74  
75 283 dependent variables. Also, polysomnography is the golden standard to detect sleep bruxism while in the  
76  
77 284 present study, a portable electromyographic recorder will be used<sup>61</sup>. However, since this device will be used

1  
2  
3 285 for several nights in a row, the fluctuating character of sleep bruxism can be taken into account and is  
4 286 therefore considered a good proxy for definite sleep bruxism<sup>59</sup>. It should be noted, however, that the portable  
5 287 recorder will fail to enable a distinction between jaw-muscle activities related to sleep bruxism and those  
6 288 related to other orofacial movement disorders like oral dyskinesia and oro-mandibular dystonia<sup>70</sup>. This is an  
7 289 important issue, because such movement disorders can be present in patients with PD related to their  
8 290 medication usage. In fact, in their updated international consensus paper on bruxism, Lobbezoo et al. (2018)  
9 291 added the phrase that bruxism is a masticatory muscle activity in “otherwise healthy individuals”<sup>61</sup>. People  
10 292 living with PD are certainly not “otherwise healthy”. In the later stages of levodopa-treated PD, dyskinesias,  
11 293 including oral dyskinesias, commonly occur<sup>70</sup>. Hence, the question could be raised if the masticatory muscle  
12 294 activity observed in people with PD is “bruxism” at all. This calls for caution in the interpretation of the  
13 295 bruxism-related findings of this study. Fortunately, in the questionnaire and clinical examination of the MDS-  
14 296 UPDRS<sup>39</sup> (Table 2), the presence of oral dyskinesia and oro-mandibular dystonia is included. Hence, it is  
15 297 possible to correct for their presence in the data analysis.

16 298

17 299 This study does not include a control group. This limits the interpretation of whether the prevalence of  
18 300 bruxism or TMDs is low or high in people with PD, which will only be possible by comparing the findings with  
19 301 prevalences as reported in the literature. In addition, since tooth wear in older people reflects a lifetime of  
20 302 factors, it will be also difficult to interpret the tooth wear findings in people with PD without having the  
21 303 possibility for a direct comparison with similar individuals without PD. Also in this case, comparisons should be  
22 304 sought with literature data. These issues should be considered limitations of this study.

23 305

24 306 In conclusion, this study will give more detailed information about the presence of bruxism and TMD pain in  
25 307 patients with PD, as well as about possible associated factors like medication usage and severity of the disease.  
26 308 Finally, more clinically relevant information will become available for dentists and other oral health care  
27 309 professionals about the amount of tooth wear and the composition of saliva in patients with PD.

## 30 310 **Ethics and dissemination:**

31 311 This study protocol has been approved by the Medical Ethics Review Committee of Amsterdam UMC, location  
32 312 VUmc; NL. 2019.143). Informed consent will be obtained from all participants. A data monitor will meet  
33 313 annually to primarily concentrate on the safety of patients, and will be monitoring the collected data and  
34 314 informed consents. The results will be published in peer-reviewed journals, if relevant presented at  
35 315 conferences, and published as part of a Ph.D. thesis.

36 316

37 317 Due to the sensitive nature of personal information, all data will be blinded and stored in secure  
38 318 environments. Only the executive researcher and the head of the department can reach the unblinded  
39 319 informed consents and the key for unblinding. These are stored separately. Digital data will be stored  
40 320 pseudonymized in a secure database using Castor EDC (CDISC, Amsterdam, Netherlands). Detailed methods for  
41 321 data management and storage can be obtained by contacting the corresponding author.

1  
2  
3 322 **Authors contribution**  
4

5 323 All authors (MV, MK, KvD, HB and FL) were involved in designing this study. MV obtained the approval of the  
6 324 Medical Ethics Review Committee and drafted the manuscript. Finally, all authors (MV, MK, KvD, HB and FL)  
7  
8 325 gave feedback on the draft and approved the final manuscript.  
9

10 326 **Funding statement:**

11  
12 327 This work was partly supported by the foundation for Oral Health and Parkinson's Disease (Stichting Mondzorg  
13 & Parkinson), the Dutch association for scientific dentistry (Nederlandse Wetenschappelijke Vereniging voor  
14 328 Tandheelkunde (Nwvt)), and the Dutch association for Orofacial Pain, Dysfunction and Prosthetic Dentistry  
15 329 (Nederlandse Vereniging voor Gnathologie en Prothetische Tandheelkunde (NvGPT)).  
16  
17 330

18  
19 331 **Competing interest**

20  
21 332 Dr. Lobbezoo reports grants and other from Sunstar Suisse SA, grants from Somnomed, grants from Airway  
22  
23 333 Management, grants from Vivisol-Resmed, grants from Health Holland/TKI, outside the submitted work.  
24  
25  
26  
27  
28  
29  
30  
31  
32  
33  
34  
35  
36  
37  
38  
39  
40  
41  
42  
43  
44  
45  
46  
47  
48  
49  
50  
51  
52  
53  
54  
55  
56  
57  
58  
59  
60

## References

1. Kalia L V, Lang AE, Shulman G. Parkinson's disease. *Lancet* 2015; 386(9996): 896-912
2. Opara JA, Matecki A, Małeczka E, Socha T. Motor assessment in parkinson's disease. *Ann Agric Environ Med* 2017; 24(3): 411-415
3. Khoo TK, Yarnall AJ, Duncan GW, et al. The spectrum of nonmotor symptoms in early Parkinson disease. *Neurology* 2013; 80(3): 276-281
4. Chaudhuri KR, Healy DG, Schapira AH V. Non-motor symptoms of Parkinson's disease: diagnosis and management. *Lancet Neurol* 2006; 5(3): 235-45.
5. Politis, M., Wu, K., Molloy, S., P, G. B., Chaudhuri, K. R., & Piccini, P. (2010). Parkinson's disease symptoms: the patient's perspective. *Mov Disord*, 25(11), 1646-1651
6. Silverdale, M. A., Kobylecki, C., Kass-Iliyya, L., Martinez-Martin, P., Lawton, M., Cotterill, S., et al. (2018). A detailed clinical study of pain in 1957 participants with early/moderate Parkinson's disease. *Parkinsonism Relat Disord*, 56, 27-32.
7. Ettinger RL. Oral health and the aging population. *J Am Dent Assoc* 2007; 138(suppl): 5S-6S
8. Lobbezoo F, Ahlberg J, Glaros AG, Kato T, Koyano K, Lavigne GJ, de Leeuw R, Manfredini D, Svensson P, Winocur E. Bruxism defined and graded: an international consensus. *J Oral Rehabil*. 2013 Jan;40(1):2-4. doi: 10.1111/joor.12011. Epub 2012 Nov 4. PMID: 23121262.
9. Leeuw R de, Klasser GD. *Orofacial Pain: Guidelines for Assessment, Diagnosis, and Management. 5th edition.* Chicago: Quintessence Publishing Co; 2013
10. Papagianni CE, van der Meulen MJ, Naeije M, Lobbezoo F. Oral health-related quality of life in patients with tooth wear. *J Oral Rehabil* 2013; 40(3): 185-90
11. Stiphout MAE van, Marinus J, Hilten JJ Van, Lobbezoo F, Baat C De. Oral Health of Parkinson's Disease Patients: A Case-Control Study. *Parkinson Dis* 2018; e9315285
12. Villa A, Wolff A, Narayana N, et al. World Workshop on Oral Medicine VI: a systematic review of medication-induced salivary gland dysfunction. *Oral Dis* 2016; 22(5): 365-82
13. Maeda T, Nagata K, Satoh Y, Yamazaki T, Takano D. High prevalence of gastroesophageal reflux disease in Parkinson's disease: A questionnaire-based study. *Parkinsons Dis* 2013; e742128
14. Wetselaar P, Manfredini D, Ahlberg J, et al. Associations between tooth wear and dental sleep disorders: A narrative overview. *J Oral Rehabil* 2019;
15. Lobbezoo F, Naeije M. Bruxism is mainly regulated centrally, not peripherally. *J Oral Rehabil* 2001; 28(12): 1085-1091
16. Lobbezoo F, Lavigne GJ, Tanguay R, Montplaisir JY. The effect of the catecholamine precursor L-dopa on sleep bruxism: A controlled clinical trial. *Mov Disord* 1997; 12(1): 73-78
17. Lobbezoo F, Soucy J, Montplaisir JY, Lavigne GJ. Striatal D2 Receptor Binding in Sleep Bruxism : A Controlled Study with Iodine-123-Iodobenzamide and Single-photon-emission Computed Tomography. *J Dent Res* 1996; 75(10): 1804-10
18. Lobbezoo F, Soucy JP, Hartman NG, Montplaisir JY, Lavigne GJ. Effects of the D2 receptor agonist bromocriptine on sleep bruxism: report of two single-patient clinical trials. *J Dent Res* 1997; 76(9): 1610-1614
19. Albers JA, Chand P, Anch AM. Multifactorial sleep disturbance in Parkinson's disease. *Sleep Med* 2017; 35: 41-48
20. Menza M, Dobkin RD, Marin H, Bienfait K. Sleep disturbances in Parkinson's disease. *Mov Disord* 2010; 25(suppl 1): S117-22
21. Kato T, Montplaisir JY, Guitard F, Sessle BJ, Lund JP, Lavigne GJ. Evidence that experimentally induced sleep bruxism is a consequence of transient arousal. *J Dent Res* 2003; 82(4): 284-8

- 1
- 2
- 3 22. Abe S, Gagnon JF, Montplaisir JY, et al. Sleep bruxism and oromandibular myoclonus in rapid eye movement sleep
- 4 behavior disorder: A preliminary report. *Sleep Med* 2013; 14(10): 1024-1030
- 5
- 6 23. Lavigne GJ, Rompré PH, Poirier G, Huard H, Kato T, Montplaisir JY. Rhythmic masticatory muscle activity during
- 7 sleep in humans. *J Dent Res* 2001; 80(2): 443-8
- 8
- 9 24. Manfredini D, Lobbezoo F. Relationship between bruxism and temporomandibular disorders: a systematic review
- 10 of literature from 1998 to 2008. *Oral Surg Oral Med Oral Pathol Oral Radiol Endod.* 2010;109(6):e26-e50
- 11
- 12 25. Tai Y-C, Lin C-H. An overview of pain in Parkinson's disease. *Clin Park Relat Disord* 2020; 2: 1-8
- 13
- 14 26. Hagelberg N, Forssell H, Aalto S, et al. Altered dopamine D2 receptor binding in atypical facial pain. *Pain* 2003;
- 15 106(1-2): 43-48
- 16
- 17 27. Verhoeff MC, Lobbezoo F, Wetselaar P, Aarab G, Koutris M. Parkinson's disease, temporomandibular disorders
- 18 and bruxism: A pilot study. *J Oral Rehabil* 2018; 45(11): 854-863
- 19
- 20 28. Chen Y-Y, Fan H-C, Tung M-C, Chang Y-K. The association between Parkinson's disease and temporomandibular
- 21 disorder. *PLoS One.* 2019;14(6):e0217763. doi:10.1371/journal.pone.0217763
- 22
- 23 29. Wetselaar P, Vermaire EJH, Lobbezoo F, Schuller AA. The prevalence of awake bruxism and sleep bruxism in the
- 24 Dutch adult population. *J Oral Rehabil* 2019; 46(7): 617-623
- 25
- 26 30. Visscher CM, Ligthart L, Schuller AA, et al. Comorbid Disorders and Sociodemographic Variables in
- 27 Temporomandibular Pain in the General Dutch Population. *J Oral Facial Pain Headache* 2015; 29(1): 51-9
- 28
- 29 31. Van Selms MKA, Visscher CM, Naeije M, Lobbezoo F. Bruxism and associated factors among Dutch adolescents.
- 30 *Community Dent Oral Epidemiol* 2013; 41(4): 353-363
- 31
- 32 32. Manfredini D, Lobbezoo F. Role of psychosocial factors in the etiology of bruxism. *J Orofac Pain* 2009; 23(2): 153-
- 33 66
- 34
- 35 33. Winocur E, Uziel N, Lisha T, Goldsmith C, Eli I. Self-reported Bruxism associations with perceived stress, motivation
- 36 for control, dental anxiety and gagging. *J Oral Rehabil* 2011; 38(1): 3-11
- 37
- 38 34. Castroflorio T, Bargellini A, Rossini G, Cugliari G, Deregibus A. Sleep bruxism and related risk factors in adults: A
- 39 systematic literature review. *Arch Oral Biol* 2017; 83:25-32
- 40
- 41 35. Nasreddine ZS, Phillips NA, Bédirian V, et al. The Montreal Cognitive Assessment, MoCA: A brief screening tool for
- 42 mild cognitive impairment. *J Am Geriatr Soc* 2005; 53(4): 695-9
- 43
- 44 36. Postuma RB, Berg D, Stern M, et al. MDS clinical diagnostic criteria for Parkinson's disease. *Mov Disord* 2015;
- 45 30(12): 1591-601
- 46
- 47 37. Kulisevsky J, Fernández de Bobadilla R, Pagonabarraga J, et al. Measuring functional impact of cognitive
- 48 impairment: validation of the Parkinson's disease cognitive functional rating scale. *Parkinsonism Relat Disord*
- 49 2013; 19(9): 812-7
- 50
- 51 38. Hoehn MM, Yahr MD. Parkinsonism : onset, progression, and mortality Parkinsonism: onset, progression, and
- 52 mortality. *Neurology* 1967; 17(5): 427-42
- 53
- 54 39. Goetz CG, Tilley BC, Shaftman SR, et al. Movement Disorder Society-Sponsored Revision of the Unified Parkinson's
- 55 Disease Rating Scale (MDS-UPDRS): Scale presentation and clinimetric testing results. *Mov Disord* 2008; 23(15):
- 56 2129-70 .
- 57
- 58 40. Tomlinson CL, Stowe R, Patel S, Rick C, Gray R, Clarke CE. Systematic review of levodopa dose equivalency
- 59 reporting in Parkinson's disease. *Mov Disord* 2010; 25(15): 2649-53
- 60
41. Beck AT, Steer RA, Brown GK. Manual for the Beck depression inventory-II. *San Antonio, TX Psychol Corp* 1996; 4:
- 561-571
42. Marin RS, Biedrzycki RC, Firinciogullari S. Reliability and validity of the apathy evaluation scale. *Psychiatry Res*
- 1991; 38(2): 143-62

- 1
- 2
- 3
- 4 43. Leentjens AFG, Dujardin K, Pontone GM, Starkstein SE, Weintraub D, Martinez-Martin P. The Parkinson anxiety scale (PAS): Development and validation of a new anxiety scale. *Mov Disord* 2014; 29(8): 1035-1043
- 5
- 6 44. Voss T, Bahr D, Cummings J, Mills R, Ravina B, Williams H. Performance of a shortened Scale for Assessment of Positive Symptoms for Parkinson's disease psychosis. *Park Relat Disord* 2013; 19(3): 295-9
- 7
- 8 45. Weintraub D, Mamikonyan E, Papay K, Shea JA, Xie SX, Siderowf A. Questionnaire for impulsive-compulsive disorders in Parkinson's Disease-Rating Scale. *Mov Disord* 2012; 27(2): 242-7
- 9
- 10
- 11 46. Van Dijk KD, Bidinosti M, Weiss A, Raijmakers P, Berendse HW, van de Berg WDJ. Reduced  $\alpha$ -synuclein levels in cerebrospinal fluid in Parkinson's disease are unrelated to clinical and imaging measures of disease severity. *Eur J Neurol* 2014; 21(3): 388-94
- 12
- 13
- 14 47. Berendse HW, Roos DS, Raijmakers P, Doty RL. Motor and non-motor correlates of olfactory dysfunction in Parkinson's disease. *J Neurol Sci* 2011; 310(1-2): 24-4
- 15
- 16
- 17 48. Marinus J, Visser M, Van Hilten JJ, Lammers GJ, Stiggelbout AM. Assessment of sleep and sleepiness in parkinson disease. *Sleep* 2003; 26(8): 1049-1054
- 18
- 19
- 20 49. Jonasson C, Wernersson B, Hoff DAL, Hatlebakk JG. Validation of the GerdQ questionnaire for the diagnosis of gastro-oesophageal reflux disease. *Aliment Pharmacol Ther* 2013; 37(5): 564-72
- 21
- 22
- 23 50. Schiffman E, Ohrbach R, Truelove E, et al. Diagnostic Criteria for Temporomandibular Disorders (DC/TMD) for Clinical and Research Applications: Recommendations of the International RDC/TMD Consortium Network\* and Orofacial Pain Special Interest Group†. *J Oral Facial Pain Headache* 2014; 28(1): 6-27
- 24
- 25
- 26 51. Von Korff M, Ormel J, Keefe FJ, Dworkin SF. Grading the severity of chronic pain. *Pain* 1992; 50(2): 133-149
- 27
- 28 52. Chung F, Abdullah HR, Liao P. STOP-bang questionnaire a practical approach to screen for obstructive sleep apnea. *Chest* 2016; 149(3): 631-638
- 29
- 30
- 31 53. Wetselaar P, Lobbezoo F. The tooth wear evaluation system: A modular clinical guideline for the diagnosis and management planning of worn dentitions. *J Oral Rehabil* 2016; 43(1): 69-80
- 32
- 33
- 34 54. Das P, Challacombe SJ. Dry Mouth and Clinical Oral Dryness Scoring Systems. *Prim Dent J* 2016; 5(1): 77-79
- 35
- 36 55. Visscher CM, Naeije M, De Laat A, et al. Diagnostic accuracy of temporomandibular disorder pain tests: a multicenter study. *J Orofac Pain* 2009; 23(2): 108-114
- 37
- 38 56. Maldupa I, Brinkmane A, Mihailova A. Comparative analysis of CRT buffer, GC saliva check buffer tests and laboratory titration to evaluate saliva buffering capacity. *Stomatologija* 2011; 13(2): 55-61
- 39
- 40
- 41 57. Bracci A, Djukic G, Favero L, Salmaso L, Guarda-Nardini L, Manfredini D. Frequency of awake bruxism behaviours in the natural environment. A 7-day, multiple-point observation of real-time report in healthy young adults. *J Oral Rehabil* 2018; 45(6): 423-429
- 42
- 43
- 44 58. Yachida W, Arima T, Castrillon EE, Baad-Hansen L, Ohata N, Svensson P. Diagnostic validity of self-reported measures of sleep bruxism using an ambulatory single-channel EMG device. *J Prosthodont Res* 2016; 60(4): 250-257
- 45
- 46
- 47 59. Stuginski-Barbosa J, Porporatti AL, Costa YM, Svensson P, Conti PCR. Diagnostic validity of the use of a portable single-channel electromyography device for sleep bruxism. *Sleep Breath* 2016; 20(2): 695-702
- 48
- 49
- 50 60. Manfredini D, Winocur E, Guarda-Nardini L, Paesani D, Lobbezoo F. Epidemiology of Bruxism in Adults: A Systematic Review of the Literature. *J Orofac Pain* 2013; 27(2): 99-110
- 51
- 52
- 53 61. Lobbezoo F, Ahlberg J, Raphael KG, et al. International consensus on the assessment of bruxism: Report of a work in progress. *J Oral Rehabil* 2018; 45(11): 837-844
- 54
- 55
- 56 62. Durham J, Newton-John TR ZJ. Temporomandibular disorders. *BMJ* 2015; 350: h1154
- 57
- 58 63. L. Naing, T. Winn, B.N. Rusli Practical Issues in Calculating the Sample Size for Prevalence Studies. *Archives of Orofacial Sciences* 2006; 1: 9-14
- 59
- 60



- 1  
2  
3 64. Ella B, Ghorayeb I, Burbaud P, Guehl D. Bruxism in Movement Disorders: A Comprehensive Review. *J Prosthodont* 2017; 26(7): 599-605  
4  
5  
6 65. Manfredini, D., Ahlberg, J., Wetselaar, P., Svensson, P., & Lobbezoo, F. (2019). The bruxism construct: From cut-off points to a continuum spectrum. *J Oral Rehabil*, 46(11), 991-997  
7  
8 66. Raphael, K. G., Santiago, V., & Lobbezoo, F. (2016). Is bruxism a disorder or a behaviour? Rethinking the international consensus on defining and grading of bruxism. *J Oral Rehabil*, 43(10), 791-798.  
9  
10  
11 67. Sung S, Vijjaratnam N, Chan DWC, Farrell M, Evans AH. Pain sensitivity in Parkinson's disease: Systematic review and meta-analysis. *Parkinsonism Relat Disord*. 2018 Mar;48:17-27. Doi: 10.1016/j.parkreldis.2017.12.031. Epub 2017 Dec 29. PMID: 29398491.  
12  
13  
14 68. Goldstein RE, Auclair Clark W. The clinical management of awake bruxism. *J Am Dent Assoc* 2017; 148(6): 387-391  
15  
16 69. Kawakami S, Kumazaki Y, Manda Y, Oki K, Minagi S. Specific diurnal EMG activity pattern observed in occlusal collapse patients: Relationship between diurnal bruxism and tooth loss progression. *PLoS One* 2014; 9(7): e101882  
17  
18  
19 70. Lobbezoo F. Taking up challenges at the interface of wear and tear. *J Dent Res*. 2007 Feb;86(2):101-3. 42.  
20  
21  
22  
23  
24  
25  
26  
27  
28  
29

## 30 Figure Legends

31  
32  
33  
34 Figure 1. Visualization of the possible interactions between the different research variables. *Parkinson's Disease (PD)* is associated with bruxism through different variables: the dopaminergic system (pathophysiology) plays a role in both PD and bruxism; the prodromal phase of PD (RBD) shows the same characteristics during sleep as does bruxism; sleep disturbances lead to micro-arousals that can lead to bruxism; dopaminergic medication (levodopa) can influence bruxism; depression is one of the risk factors for bruxism and is more prevalent in patients with PD; and finally, both PD and bruxism are regulated centrally and not peripherally. PD is also associated with TMD: PD patients experience pain in the entire body (i.e., widespread pain), which is a risk factor for TMD pain; also, musculoskeletal pain (as in TMD pain) is frequently present; and finally, alterations in the striatal dopaminergic system (D1/D2 ratio) could play a role in TMD pain. Bruxism itself is a risk factor for TMD pain and vice versa. Besides, tooth wear can be a consequence of bruxism. When bruxism occurs, saliva can be increased, which can be a protective factor for tooth wear. Also, saliva can be changed due to PD medication. Finally, several exogenic, psychogenic, and physiologic factors can be a risk for bruxism.  
35  
36  
37  
38  
39  
40  
41  
42  
43  
44  
45  
46  
47

48 Figure 2. Flowchart of the study in which a distinction was made between the attendance of participants at the hospital and the study components at the participant's home. The intake and first survey is part of the regular care at the hospital, and only followed by an additional MRI and/or DAT-SPECT scan when indicated (dashed line). When patients are eligible and consent to participate (screening by phone), the additional data are collected after the intake. First, a questionnaire is filled in by the participants. After that, the participant is invited for the clinical examination. When questionnaires/screenings that are part of the regular care were filled in  $\geq 1$  year ago, participants will be asked to repeat this procedure simultaneously with the additional questionnaire and/or clinical examination. Finally, participants will sleep for 5 complete registration nights with the GrindCare for the assessment of sleep bruxism (when exclusion criterion 2 was not met) and use the BruxApp for 5 complete registration days for the assessment of awake bruxism (when exclusion criterion 3 was not met).  
49  
50  
51  
52  
53  
54  
55  
56  
57  
58  
59  
60

1  
2  
3  
4  
5  
6  
7  
8  
9  
10  
11  
12  
13  
14  
15  
16  
17  
18  
19  
20  
21  
22  
23  
24  
25  
26  
27  
28  
29  
30  
31  
32  
33  
34  
35  
36  
37  
38  
39  
40  
41  
42  
43  
44  
45  
46  
47  
48  
49  
50  
51  
52  
53  
54  
55  
56  
57  
58  
59  
60

Figure 3. Flowchart of the data-analysis related to the first secondary aim: “to investigate which factors are influencing the presence of probable awake/sleep bruxism, TMD pain and the frequency of definite awake/sleep bruxism”. All variables will be tested individually to see whether an association with the dependent variable (awake and sleep bruxism and TMD pain) exists, and to see how strong this association is (step 1). This dataset will be analysed for both probable bruxism and TMD pain with the use of logistic regression analyses. For definite bruxism, a linear regression analysis will be used (step 2). The forward selection procedure will be used for the (strongest) independent variables until all variables in this regression model show a P-value <0.05 (step 2). In both step 1 and step 2, a distinction will be made between sleep and awake bruxism.



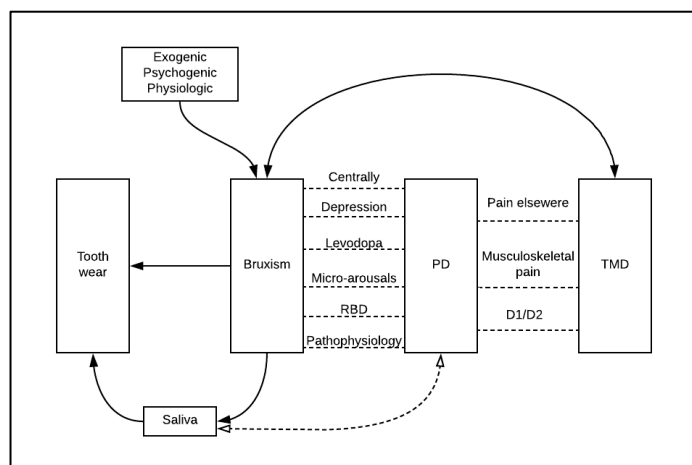

Figure 1. Visualization of the possible interactions between the different research variables. *Parkinson's Disease (PD)* is associated with bruxism through different variables: the dopaminergic system (pathophysiology) plays a role in both conditions; the prodromal phase of PD (RBD) shows the same characteristics during sleep as does bruxism; sleep disturbances lead to micro-arousals that can lead to bruxism; dopaminergic medication (levodopa) can influence bruxism; depression is one of the risk factors for bruxism and is more prevalent in patients with PD; and finally, both PD and bruxism are regulated centrally and not peripherally. PD is also associated with TMD: PD patients experience pain in the entire body (i.e., widespread pain), which is a risk factor for TMD pain; also, musculoskeletal pain (as in TMD pain) is frequently present; and finally, alterations in the striatal dopaminergic system (D1/D2 ratio) could play a role in TMD pain. Bruxism itself is a risk factor for TMD pain and vice versa. Besides, tooth wear can be a consequence of bruxism. When bruxism occurs, saliva can be increased, which can be a protective factor for tooth wear. Also, saliva can be changed due to PD medication. Finally, several exogenic, psychogenic, and physiologic factors can be a risk for bruxism.

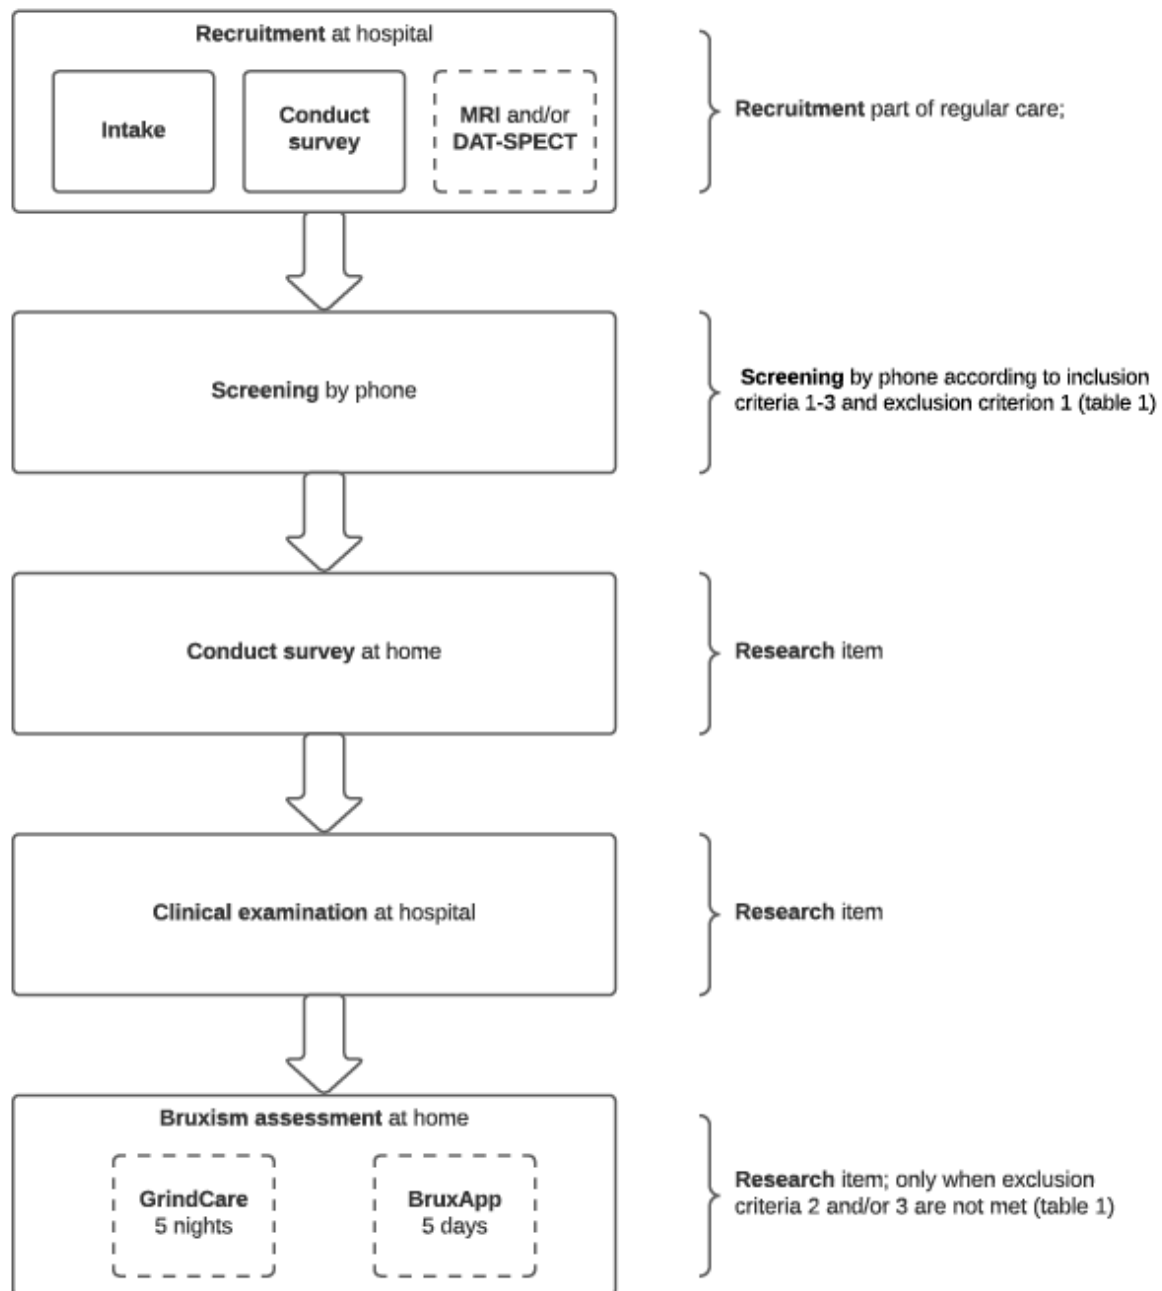

Figure 2. Flowchart of the study in which a distinction was made between the attendance of participants at the hospital and the study components at the participant's home. The intake and first survey is part of the regular care at the hospital, and only followed by an additional MRI and/or DAT-SPECT scan when indicated (dashed line). When patients are eligible and consent to participate (screening by phone), the additional data are collected after the intake. First, a questionnaire is filled in by the participants. After that, the participant is invited for the clinical examination. When questionnaires/screenings that are part of the regular care were filled in  $\geq 1$  year ago, participants will be asked to repeat this procedure simultaneously with the additional questionnaire and/or clinical examination. Finally, participants will sleep for 5 complete registration nights with the GrindCare for the assessment of sleep bruxism (when exclusion criterion 2 was not met) and use the BruxApp for 5 complete registration days for the assessment of awake bruxism (when exclusion criterion 3 was not met).

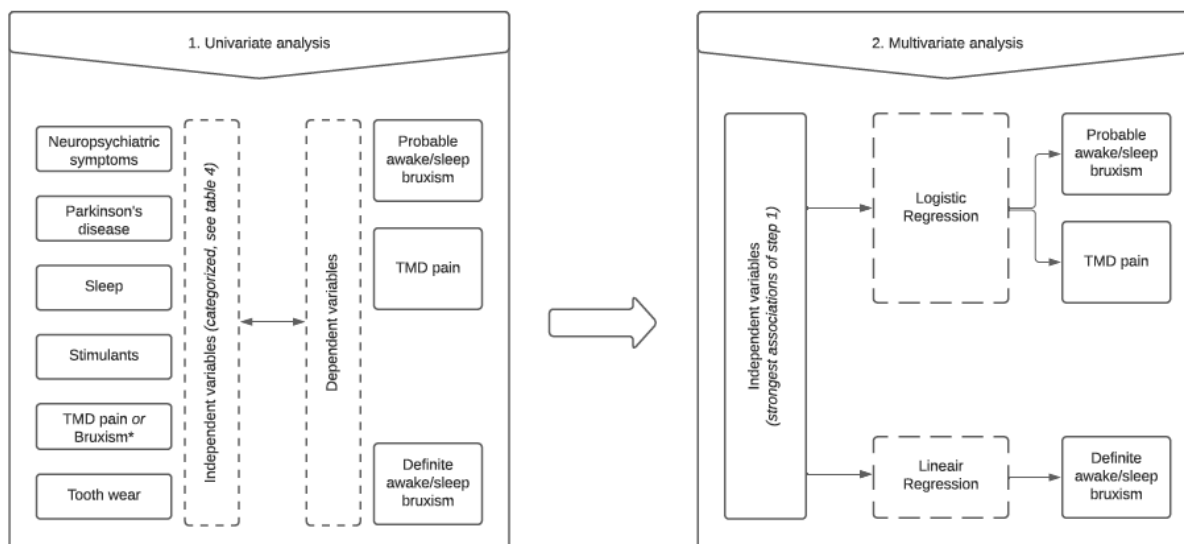

Figure 3. Flowchart of the data-analysis related to the first secondary aim: “to investigate which factors are influencing the presence of probable awake/sleep bruxism, TMD pain and the frequency of definite awake/sleep bruxism”. All variables will be tested individually to see whether an association with the dependent variable (awake and sleep bruxism and TMD pain) exists, and to see how strong this association is (step 1). This dataset will be analysed for both probable bruxism and TMD pain with the use of logistic regression analyses. For definite bruxism, a linear regression analysis will be used (step 2). The forward selection procedure will be used for the (strongest) independent variables until all variables in this regression model show a P-value <0.05 (step 2). In both step 1 and step 2, a distinction will be made between sleep and awake bruxism.

## Appendix 1

All secondary study parameters are listed below, along with a description of the questionnaires/ instruments that will be used for their assessment.

### General disease information:

- Disease severity: see motor symptoms.
- Disease stage: will be established with the Hoehn & Yahr scale. This is a 0 to 5 scale: “asymptomatic (score 0)”, “only unilateral involvement (score 1)”, “bilateral involvement without impairment of balance (score 2)”, “light to mild bilateral involvement, some postural instability and physically independent (score 3)”, “severe disability, still able to walk independent (score 4)”, and “wheelchair or bed bounded without help (score 5)”, in which a higher number means a more developed disease stage<sup>1</sup>.
- Levodopa equivalent daily dosage (LEDD): this is, according to Tomlinson, a “summation of each individual antiparkinsonian drug aligned to 100mg immediate release L-dopa, by means of individual conversion factors”<sup>2,3</sup>.
- Presynaptic dopaminergic loss: will be analysed by means of DAT-SPECT, when applicable.

### Motor symptoms:

- Motor symptoms: will be analysed with the Movement Disorder Society Unified Parkinson Disease Rating Scale III (MDS-UPDRS III)<sup>4</sup>. This involves an examination of motor function, performed by an examiner (e.g., neurologist, trained nurse, or trained research assistant). The patient has to complete 18 motoric tasks. Subsequently, the examiner scores the tasks from 0 till 4: “normal (score 0)”, “slight (score 1)”, “mild (score 2)”, “moderate (score 3)”, and “severe (score 4)” motor problems for that specific part. Finally, a summation of each individual task is established, after that a classification can be made: “mild (score  $\leq$  32)”, “moderate (score 33-58)”, and “severe (score  $\geq$  59)” motor problems<sup>5</sup>.

### Non-motor symptoms:

- Anxiety: will be registered through the Parkinson Anxiety Scale (PAS)<sup>6</sup>. The PAS consists of 3 questionnaires (persistent anxiety, episodic anxiety, and avoidance behavior), with in total 12 questions. There are 5 response options, scored as 0 till 4: “never (score 0)”, “occasionally (score 1)”, “sometimes (score 2)”, “frequently (score 3)”, and “always (score 4)”. Afterwards, 4 groups can be made: “generalized anxiety disorder (score  $\geq$  11 on that subscale)”, “episodic anxiety (score  $\geq$  6 on that subscale)”, “avoidance behavior (score  $\geq$  5 on that subscale)”, and “any anxiety disorder score (score  $\geq$  14)”.
- Apathy: will be measured by means of the apathy evaluation scale (AES)<sup>7</sup>. This scale has 14 statements, with 4 response options: “not at all (score 0)”, “slightly (score 1)”, “somewhat (score 2)”, and “a lot (score 3)”. A total sum score of 42 can be reached. When a higher score is reached, apathy plays a bigger role. The cut off point for “high apathy score” is 14 points.
- Cognitive function: will be analysed by means of the Montreal Cognitive Assessment (MoCA)<sup>8,9</sup> and the Parkinson’s Disease Cognitive Functional Rating Scale, (PD-CFRS)<sup>10,11</sup>. The MoCA is a screening instrument for cognitive dysfunctions on different aspects, such as memory or language, which exist of 11 items in 8 different domains. The examiner (e.g., neurologist, trained nurse, or trained research assistant). scores

each item individually. A sum score of 30 can be reached, wherein a score of 26 or above represents a normal cognitive function and a score above 21 represents a mild cognitive impairment. The PD-CFRS exists of 12 questions with four response options, scored as follows: “No (score 0)”, “Sometimes (score 1)”, “A lot (score 2)” and “not applicable”. All questions answered with “not applicable” will be scored with the mean of all the other questions. A total score of 0-24 can be reached, a higher score means more cognitive problems. The total score will be used.

- Depression: will be registered through the Beck Depression Inventory (BDI-II)<sup>12,13,14</sup>. The BDI-II exists of 21 questions with four response options, scored as 0 till 4 (for example: “I do not feel sad”, “I feel sad much of the time”, “I am sad the whole time”, and “I am sad or so unhappy that I can’t stand it”). A maximum of 63 points can be assembled. Afterwards, 4 groups can be made: “none or minimal (score 0-13)”, “light (score 14-19)”, “moderate (score 20-28)”, and “severe (score 29-63)” depressive symptoms.
- Impulsive-compulsive behavior: will be analysed by means of the Questionnaire for Impulsive-Compulsive Disorders in Parkinson's Disease-Rating Scale (QUIP-RS)<sup>15</sup>. This questionnaire has 7 subscales and in total 28 questions, with 5 response options scored 0 till 4: “never (score 0)”, “occasionally (score 1)”, “sometimes (score 2)”, “frequently (score 3)”, and “a lot (score 3)”. For a combined impulse control disorder, 4 subscales are combined. A total sum score of 64 can be reached, a higher score indicating more impulsive-compulsive behavior. When 10 points or above are registered, an impulse control disorder is present.
- Psychosis: will be measured by means of Parkinson’s disease-adapted scale for assessment of positive symptoms (SAPS-PD)<sup>16</sup>. This 9-item observer-rated scale is scored from 0 till 5: “none (score 0)”, “possible (score 1)”, “mild (score 2)”, “mediocre (score 3)”, “explicit (score 4)”, and “severe (score 5)”, including a part about hallucinations and a part about disillusions. A higher sum score means a probable presence of psychosis. The total score will be used.
- Quality of sleep: is analysed by means of two types of questionnaires that are used in this study to assess this construct. The STOP-BANG-NL<sup>17</sup> questionnaire that screens for the risk for moderate to severe obstructive sleep apnea (OSA), and the Scales for Outcomes PD Sleep (SCOPA-sleep)<sup>18</sup> that screens for quality of sleep during the night and sleepiness during the day. The STOP-BANG-NL consists of 8 questions, with 2 response options: yes (score 1) and no (score 0). The total score ranges from 0-8, a classification can be made: “low risk for OSA (score < 3)”, “intermediate risk (score 3-4)” and “severe risk for OSA (≥ 5)”<sup>17</sup>. The SCOPA-Sleep questionnaire consists of 6 questions about daytime sleepiness, with 4 response options scored from 0 till 3: “never (score 0)”, “sometimes (score 1)”, “frequently (score 2)”, and “a lot (score 3)”, and 5 questions about night time sleep, with 4 response options scored from 0 till 3: “not at all (score 0)”, “somewhat (score 1)”, “quite (score 2)”, and “a lot (score 3)”. A higher score means more daytime sleepiness and/or more nighttime sleep problems.

#### **Oral health and dysfunction:**

- Reflux: will be analysed with the Gastroesophageal Reflux Disease Questionnaire (GERD-Q NL)<sup>19</sup>. This is a self-administered questionnaire with 4 graded Likert scales scored from 0-3 for predictors of GERD, and 2

reverse Likert scales scored from 3-0 for negative predictors of GERD. The response options are as follows: “0 days (score 0 or 3)”, “1 day (score 1 or 2)”, “2-3 days (score 2 or 1)”, and “4-7 days (score 3 or 0)” dependent on a (reverse) likert scale. When a score of  $\geq 8$  is reached, there is a suspicion for GERD.

- Saliva: based on the Saliva Check Buffer© (GC EUROPE N.V), the quantity and quality (pH and buffer capacity) of saliva will be screened<sup>20</sup>. The buffer capacity stands for the capability of saliva to neutralize the environment of the mouth. Both saliva in rest and saliva that is stimulated during chewing will be investigated. An overview of the normal values is given in appendix 3. Additionally, in the clinical examination, a dry mouth screening by means of the Clinical Oral Dryness Score (CODS) will be performed, which includes a 10-item observer-rated dichotomous outcome questionnaire: “present (score 1)” and “absent (score 0)”. When a summation is performed, the following cut-off points are applicable: “mild dryness (score 0-3)”, “moderate dryness (score 4-6)”, and “severe dryness (score >6)”.
- TMD-pain intensity: will be analysed with the use of the Graded Chronic Pain Scale (GCPS)<sup>21</sup>. This is a 7-item questionnaire. Six items have an ordinal scale from 0 till 10, in which 0 stands for “no pain” and 10 for “the worst pain ever”. Additionally, the amount of days that were disabling because of the pain in the last 30 days are noted. When scoring, 5 classifications can be made: “no pain (grade 0)”, “low disability, low intensity (grade 1)”, “low disability, high intensity (grade 2)”, “high disability, moderately limiting (grade 3)”, and “high disability-severely limiting (grade 4)”.
- Tooth Wear: will be analysed with the screening module of the Tooth Wear Screening Index (TWES)<sup>22</sup> that quantifies the amount of tooth wear in 6 sextants of the mouth (right side, front, and left side of the upper jaw and the lower jaw) from 0 till 4: “no wear (score 0)”, “visible wear within the enamel (score 1)”, “visible wear with dentin exposure and loss of clinical crown height of  $\leq 1/3$  (score 2)”, “loss of crown height  $>1/3$  but  $<2/3$  (score 3)” and “loss of crown height  $\geq 2/3$  (score 4)”<sup>23</sup>. Additionally, the palatal side of the upper front is also graded from 0 till 2: “no tooth wear (score 0)”, “tooth wear confined to the enamel (score 1)”, and “tooth wear with dentin exposure (score 2)”. All numbers are scored per tooth and are not summed. The highest number will be used for analysis.

#### Miscellaneous:

- Lifestyle factors (smoking, alcohol, drugs): will be gathered by means of self-report in the standard-care questionnaire of the VUmc. Use of alcohol is noted as units per week. In case of smoking and use of drugs will be both quantified as a nominal variable (participants do (not) smoke and/or use drugs).
- Quality of life: will be analysed with the Parkinson’s Disease Questionnaire – 8 (PDQ-8)<sup>24</sup>, by means of 8 questions about quality of life regarding PD. Participants can answer at an ordinal 5-item scale, with scores from 0 till 4: “Never (score 0)”, “Occasionally (score 1)”, “Sometimes (score 2)”, “Often (score 3)”, and “Always (score 4)”. A score from 0 till 32 can be reached. When a higher score is applicable, poor health-related quality of life is present. The total score will be used.
- Somatic symptoms: will be analysed with the Patient Health Questionnaire – 15 (PHQ15)<sup>25</sup>. Severity of somatization is evaluated by means of 13 questions about somatic symptoms divided in 3 subscales, with scores 0 till 2: “not at all (score 0)”, “bothered a little (score 1)”, and “bothered a lot (score 2)”. Additionally, two questions about sleep and tiredness are present, which are also divided in 3 subscales

1  
2  
3 with scores 0 till 2: “not at all (score 0)”, “several days (score 1)”, and “more than half of the days/nearly  
4 every day (score 2)”. Scores of 0, 5, and 15 are the cut-off points for “low”, “median”, and “high somatic  
5 symptom severity”, respectively.  
6  
7  
8  
9

## 10 11 Appendix 2

12 The following formula was used for the sample size calculation:

$$13 n = (Z^2P(1-P))/d^2$$

14 Z = Z statistic for a level of confidence

15 P = expected prevalence or proportion (in proportion of one)

16 d = precision

17 For the level of confidence of 95%, Z value is 1.96.

18 With an assumed prevalence of 46% (WB according pilot study), P is 0.46

19 With a precision of +/-5 percentage points (0.05), d should be set at 0.05.  
20  
21

22 The numbers for the secondary aims are obtained when reaching the sample size for the primary aim. The  
23 approach for the sample size calculation of the secondary aims are as follows:

24 Since no clinical data of the variables that will be studied are available yet in a population with PD, an effect  
25 size is not known for our outcome measures. Nevertheless, in a recent questionnaire-based study, an  
26 association between PD on the one hand and bruxism and TMD pain on the other was reported<sup>26</sup>. The  
27 prevalence found for these outcome measures were 46.0%, 24.3%, and 29.5% for awake bruxism, sleep  
28 bruxism, and TMD pain, respectively. In the current study, a total of 6 independent categorized variables (see  
29 Table 4) will be analysed to determine if they are associated with the presence of probable and definite  
30 bruxism and/or TMD pain in patients with PD, by means of logistic and linear regression analyses (see statistical  
31 approach). We assume that only four predictors will be eligible for multivariate analysis, because (i) only  
32 predictors with the strongest associations are included, and (ii) predictors will drop out due to their probable  
33 association with each other. The literature about numbers of observations in participants per variable (events)  
34 in a logistic regression analysis indicated that for each predictor in a regression analysis, data from 10-20 events  
35 is needed<sup>27</sup>. Consequently, 15 events are chosen and thus (4x15=) 60 events are needed. Based on the  
36 prevalence of the recent questionnaire-based pilot study<sup>26</sup>, a minimum of 130 participants (60 events/0.46 (=prevalence of awake bruxism)) and a maximum of 246 participants (60 events/0.243 (=prevalence of sleep bruxism)) are needed<sup>26</sup>. For the linear regression, this estimate of the sample size is sufficient to detect medium and large effect sizes<sup>28</sup>. Because this is a wide range, an interim analysis will be done after the inclusion of at least 130 participants or a maximum of 6 months.  
37  
38  
39  
40  
41  
42  
43  
44  
45  
46  
47  
48  
49  
50  
51  
52  
53  
54  
55  
56  
57  
58  
59  
60

### Appendix 3

Cut off points for Saliva Check Buffer (GC EUROPE N.V), to determine whether the quantity and composition of saliva deviate from normal values.

| Saliva type    | Volume (ml)  | interpretation     | pH         | interpretation | Buffercapacity | Interpretation |
|----------------|--------------|--------------------|------------|----------------|----------------|----------------|
| During rest    | 1. >0.50     | 1. Hypersalivation | 1. >7.5    | 1. Abnormal    | 1. 10-12       | 1. Normal/high |
|                | 2. 0.50-0.25 | 2. Normal          | 2. 7.5-6.8 | 2. Normal      | 2. 6-9         | 2. Low         |
|                | 3. 0.24-0.10 | 3. Risk            | 3. 6.7-6.5 | 3. Risk        | 3. 0.5         | 3. Very low    |
|                | 4. <0.10     | 4. Pathologic      | 4. <6.5    | 4. Pathologic  |                |                |
| During chewing | 1. >2.00     | 1. Hypersalivation | 1. >8.0    | 1. Abnormal    | 1. 10-12       | 1. Normal/high |
|                | 2. 2.00-0.75 | 2. Normal          | 2. 8.0-7.0 | 2. Normal      | 2. 6-9         | 2. Low         |
|                | 3. 0.74-0.50 | 3. Risk            | 3. 6.9-6.5 | 3. Risk        | 3. 0-5         | 3. Very low    |
|                | 4. <0.50     | 4. Pathologic      | 4. <6.5    | 4. Pathologic  |                |                |



## References

1. Hoehn MM, Yahr MD. Parkinsonism : onset, progression, and mortality Parkinsonism: onset, progression, and mortality. *Neurology* 1967; 17(5): 427-42
2. Tomlinson CL, Stowe R, Patel S, Rick C, Gray R, Clarke CE. Systematic review of levodopa dose equivalency reporting in Parkinson's disease. *Mov Disord* 2010; 25(15): 2649-53
3. Olde Dubbelink KTE, Stoffers D, Deijen JB, Twisk JWR, Stam CJ, Berendse HW. Cognitive decline in Parkinson's disease is associated with slowing of resting-state brain activity: A longitudinal study. *Neurobiol Aging* 2013; 34(2): 408-18
4. Goetz CG, Tilley BC, Shaftman SR, et al. Movement Disorder Society-Sponsored Revision of the Unified Parkinson's Disease Rating Scale (MDS-UPDRS): Scale presentation and clinimetric testing results. *Mov Disord* 2008; 23(15): 2129-70 .
5. Martínez-Martín P, Rodríguez-Blázquez C, Alvarez M, et al. Parkinson's disease severity levels and MDS-Unified Parkinson's Disease Rating Scale. *Park Relat Disord* 2015; 21(1): 50-4
6. Leentjens AFG, Dujardin K, Pontone GM, Starkstein SE, Weintraub D, Martinez-Martin P. The Parkinson anxiety scale (PAS): Development and validation of a new anxiety scale. *Mov Disord* 2014; 29(8): 1035-1043
7. Marin RS, Biedrzycki RC, Firinciogullari S. Reliability and validity of the apathy evaluation scale. *Psychiatry Res* 1991; 38(2): 143-62
8. Nasreddine ZS, Phillips NA, Bédirian V, et al. The Montreal Cognitive Assessment, MoCA: A brief screening tool for mild cognitive impairment. *J Am Geriatr Soc* 2005; 53(4): 695-9
9. Thissen AJAM, van Bergen F, de Jonghe JFM, Kessels RPC, Dautzenberg PLJ. Applicability and validity of the Dutch version of the Montreal Cognitive Assessment (moCA-d) in diagnosing MCI. *Tijdschr Gerontol Geriatr* 2010; 41(6): 231-40
10. Kulisevsky J, Fernández de Bobadilla R, Pagonabarraga J, et al. Measuring functional impact of cognitive impairment: validation of the Parkinson's disease cognitive functional rating scale. *Parkinsonism Relat Disord* 2013; 19(9): 812-7
11. Ruzafa-Valiente E, Fernández-Bobadilla R, García-Sánchez C, Pagonabarraga J, Martínez-Horta S, Kulisevsky J. Parkinson's Disease - Cognitive Functional Rating Scale across different conditions and degrees of cognitive impairment. *J Neurol Sci* 2016; 361: 66-71
12. Beck AT, Steer RA, Brown GK. Manual for the Beck depression inventory-II. *San Antonio, TX Psychol Corp* 1996; 4: 561-571
13. Beck A, Ward C, Mendelson M, Mock J, Erbaugh J. An inventory for measuring depression. *Arch Gen Psychiatry* 1961; 4: 561-571
14. Bouman TK, Luteijn F, Albersnagel FA, der Ploeg Van. Enige ervaringen met de Beck depression inventory (BDI). *Gedrag Tijdschr voor Psychol* 1985; 13(2): 13-24
15. Voss T, Bahr D, Cummings J, Mills R, Ravina B, Williams H. Performance of a shortened Scale for Assessment of Positive Symptoms for Parkinson's disease psychosis. *Park Relat Disord* 2013; 19(3): 295-9
16. Fernandez HH, Aarsland D, Fénelon G, et al. Scales to assess psychosis in Parkinson's disease: Critique and recommendations. *Mov Disord* 2008; 23(4): 484-500
17. Chung F, Abdullah HR, Liao P. STOP-bang questionnaire a practical approach to screen for obstructive sleep apnea. *Chest* 2016; 149(3): 631-638
18. Marinus J, Visser M, Van Hilten JJ, Lammers GJ, Stiggelbout AM. Assessment of sleep and sleepiness in parkinson disease. *Sleep* 2003; 26(8): 1049-1054
19. Jonasson C, Wernersson B, Hoff DAL, Hatlebakk JG. Validation of the GerdQ questionnaire for the diagnosis of gastro-oesophageal reflux disease. *Aliment Pharmacol Ther* 2013; 37(5): 564-72

- 1  
2  
3 20. Maldupa I, Brinkmane A, Mihailova A. Comparative analysis of CRT buffer, GC saliva check buffer tests and  
4 laboratory titration to evaluate saliva buffering capacity. *Stomatologija* 2011; 13(2): 55-61  
5  
6 21. Von Korff M, Ormel J, Keefe FJ, Dworkin SF. Grading the severity of chronic pain. *Pain* 1992; 50(2): 133-149  
7  
8 22. Wetselaar P, Lobbezoo F. The tooth wear evaluation system: A modular clinical guideline for the diagnosis and  
9 management planning of worn dentitions. *J Oral Rehabil* 2016; 43(1): 69-80  
10  
11 23. Lobbezoo F, Naeije M. A reliability study of clinical tooth wear measurements. *J Prosthet Dent* 2001; 86(6):597-602  
12  
13 24. Jenkinson C, Fitzpatrick R, Peto V, Greenhall R, Hyman N. The PDQ-8: Development and validation of a short-form  
14 Parkinson's disease questionnaire. *Psychol Heal* 1997; 12(6): 805-814  
15  
16 25. Kroenke K, Spitzer RL, Williams JBW. The PHQ-15: Validity of a new measure for evaluating the severity of somatic  
17 symptoms. *Psychosom Med* 2002; 64(2):258-66  
18  
19 26. Verhoeff MC, Lobbezoo F, Wetselaar P, Aarab G, Koutris M. Parkinson's disease, temporomandibular disorders and  
20 bruxism: A pilot study. *J Oral Rehabil* 2018; 45(11): 854-863  
21  
22 27. Peduzzi P, Concato J, Kemper E, Holford TR, Feinstein AR. A simulation study of the number of events per variable  
23 in logistic regression analysis. *J Clin Epidemiol* 1996; 49(12): 1373-9  
24  
25 28. Field AP. *Discovering Statistics Using IBM SPSS Statistics: North American, 5th Edition*; 2017.  
26  
27  
28  
29  
30  
31  
32  
33  
34  
35  
36  
37  
38  
39  
40  
41  
42  
43  
44  
45  
46  
47  
48  
49  
50  
51  
52  
53  
54  
55  
56  
57  
58  
59  
60
